# Supplementary material
Source: publisher figshare collection journal article supplement (https://acs.figshare.com/ndownloader/files/4715587)
Supplement: Supplementary file 1 [file 4715587]

_publ_contact_author              'Jhy-Der Chen'
_publ_contact_author_email        jdchen@cycu.edu.tw
_publ_author_name                 
;
Huan-Chin Chen, Hui-Ling Hu, Zhi-Kai Chan, Chun-Wei Yeh, Hsi-Wei Jia, Chi-Phi Wu, Jhy-Der Chen, Ju-Chun Wang
;


 
  
data_1 
  
_audit_creation_method            SHELXL-97 
_chemical_name_systematic 
; 
 ? 
; 
_chemical_name_common             ? 
_chemical_melting_point           ? 
_chemical_formula_moiety          ? 
_chemical_formula_sum 
 'C17 H18 Cl3 D N4 O2' 
_chemical_formula_weight          418.72 
  
loop_ 
 _atom_type_symbol 
 _atom_type_description 
 _atom_type_scat_dispersion_real 
 _atom_type_scat_dispersion_imag 
 _atom_type_scat_source 
 'C'  'C'   0.0033   0.0016 
 'International Tables Vol C Tables 4.2.6.8 and 6.1.1.4' 
 'H'  'H'   0.0000   0.0000 
 'International Tables Vol C Tables 4.2.6.8 and 6.1.1.4' 
 'N'  'N'   0.0061   0.0033 
 'International Tables Vol C Tables 4.2.6.8 and 6.1.1.4' 
 'O'  'O'   0.0106   0.0060 
 'International Tables Vol C Tables 4.2.6.8 and 6.1.1.4' 
 'Cl'  'Cl'   0.1484   0.1585 
 'International Tables Vol C Tables 4.2.6.8 and 6.1.1.4' 
 'D'  'D'   0.0000   0.0000 
 'International Tables Vol C Tables 4.2.6.8 and 6.1.1.4' 
  
_symmetry_cell_setting            Monoclinic 
_symmetry_space_group_name_H-M    P2(1)/c 
  
loop_ 
 _symmetry_equiv_pos_as_xyz 
 'x, y, z' 
 '-x, y+1/2, -z+1/2' 
 '-x, -y, -z' 
 'x, -y-1/2, z-1/2' 
  
_cell_length_a                    9.8917(8) 
_cell_length_b                    8.2994(6) 
_cell_length_c                    24.1948(18) 
_cell_angle_alpha                 90.00 
_cell_angle_beta                  92.004(6) 
_cell_angle_gamma                 90.00 
_cell_volume                      1985.1(3) 
_cell_formula_units_Z             4 
_cell_measurement_temperature     295(2) 
_cell_measurement_reflns_used     26 
_cell_measurement_theta_min       5.78 
_cell_measurement_theta_max       12.51 
  
_exptl_crystal_description        plate 
_exptl_crystal_colour             colorless 
_exptl_crystal_size_max           0.6 
_exptl_crystal_size_mid           0.2 
_exptl_crystal_size_min           0.1 
_exptl_crystal_density_meas       ? 
_exptl_crystal_density_diffrn     1.401 
_exptl_crystal_density_method     'not measured' 
_exptl_crystal_F_000              864 
_exptl_absorpt_coefficient_mu     0.481 
_exptl_absorpt_correction_type    empirical 
_exptl_absorpt_correction_T_min   0.7409 
_exptl_absorpt_correction_T_max   0.8047 
_exptl_absorpt_process_details    ? 
  
_exptl_special_details 
; 
 ? 
; 
  
_diffrn_ambient_temperature       295(2) 
_diffrn_radiation_wavelength      0.71073 
_diffrn_radiation_type            MoK\a 
_diffrn_radiation_source          'fine-focus sealed tube' 
_diffrn_radiation_monochromator   graphite 
_diffrn_measurement_device_type   'Bruker P4' 
_diffrn_measurement_method        '\w scans' 
_diffrn_detector_area_resol_mean  ? 
_diffrn_standards_number          3 
_diffrn_standards_interval_count  97 
_diffrn_standards_interval_time   ? 
_diffrn_standards_decay_%         ? 
_diffrn_reflns_number             4330 
_diffrn_reflns_av_R_equivalents   0.0214 
_diffrn_reflns_av_sigmaI/netI     0.0282 
_diffrn_reflns_limit_h_min        -1 
_diffrn_reflns_limit_h_max        11 
_diffrn_reflns_limit_k_min        -1 
_diffrn_reflns_limit_k_max        9 
_diffrn_reflns_limit_l_min        -28 
_diffrn_reflns_limit_l_max        28 
_diffrn_reflns_theta_min          2.06 
_diffrn_reflns_theta_max          25.00 
_reflns_number_total              3452 
_reflns_number_gt                 2466 
_reflns_threshold_expression      >2sigma(I) 
  
_computing_data_collection        'Bruker XSCANS' 
_computing_cell_refinement        'Bruker XSCANS' 
_computing_data_reduction         'Bruker SHELXTL' 
_computing_structure_solution     'SHELXS-97 (Sheldrick, 1990)' 
_computing_structure_refinement   'SHELXL-97 (Sheldrick, 1997)' 
_computing_molecular_graphics     'Bruker SHELXTL' 
_computing_publication_material   'Bruker SHELXTL' 
  
_refine_special_details 
; 
 Refinement of F^2^ against ALL reflections.  The weighted R-factor wR and 
 goodness of fit S are based on F^2^, conventional R-factors R are based 
 on F, with F set to zero for negative F^2^. The threshold expression of 
 F^2^ > 2sigma(F^2^) is used only for calculating R-factors(gt) etc. and is 
 not relevant to the choice of reflections for refinement.  R-factors based 
 on F^2^ are statistically about twice as large as those based on F, and R- 
 factors based on ALL data will be even larger. 
; 
  
_refine_ls_structure_factor_coef  Fsqd 
_refine_ls_matrix_type            full 
_refine_ls_weighting_scheme       calc 
_refine_ls_weighting_details 
 'calc w=1/[\s^2^(Fo^2^)+(0.0796P)^2^+1.4468P] where P=(Fo^2^+2Fc^2^)/3' 
_atom_sites_solution_primary      direct 
_atom_sites_solution_secondary    difmap 
_atom_sites_solution_hydrogens    geom 
_refine_ls_hydrogen_treatment     mixed 
_refine_ls_extinction_method      SHELXL 
_refine_ls_extinction_coef        0.011(2) 
_refine_ls_extinction_expression 
 'Fc^*^=kFc[1+0.001xFc^2^\l^3^/sin(2\q)]^-1/4^' 
_refine_ls_number_reflns          3452 
_refine_ls_number_parameters      339 
_refine_ls_number_restraints      0 
_refine_ls_R_factor_all           0.0840 
_refine_ls_R_factor_gt            0.0610 
_refine_ls_wR_factor_ref          0.1781 
_refine_ls_wR_factor_gt           0.1598 
_refine_ls_goodness_of_fit_ref    1.047 
_refine_ls_restrained_S_all       1.047 
_refine_ls_shift/su_max           0.000 
_refine_ls_shift/su_mean          0.000 
  
loop_ 
 _atom_site_label 
 _atom_site_type_symbol 
 _atom_site_fract_x 
 _atom_site_fract_y 
 _atom_site_fract_z 
 _atom_site_U_iso_or_equiv 
 _atom_site_adp_type 
 _atom_site_occupancy 
 _atom_site_symmetry_multiplicity 
 _atom_site_calc_flag 
 _atom_site_refinement_flags 
 _atom_site_disorder_assembly 
 _atom_site_disorder_group 
O1 O 0.5778(2) 0.4520(3) 0.20520(9) 0.0699(7) Uani 1 1 d . . . 
O2 O 0.9550(2) 0.7816(3) 0.04522(11) 0.0811(8) Uani 1 1 d . . . 
N1 N 0.2649(2) 0.3150(3) 0.09430(10) 0.0558(7) Uani 1 1 d . . . 
N2 N 0.4371(2) 0.4698(3) 0.12932(10) 0.0502(6) Uani 1 1 d . . . 
N3 N 1.1447(2) 0.6297(4) 0.05149(11) 0.0532(7) Uani 1 1 d . . . 
N4 N 1.3609(2) 0.6605(3) 0.02379(10) 0.0526(6) Uani 1 1 d . . . 
C1 C 0.3910(3) 0.2061(4) 0.17140(13) 0.0635(9) Uani 1 1 d . . . 
C2 C 0.3155(4) 0.0673(5) 0.16788(15) 0.0744(10) Uani 1 1 d . . . 
C3 C 0.2149(4) 0.0515(5) 0.12729(16) 0.0726(10) Uani 1 1 d . . . 
C4 C 0.1941(4) 0.1778(4) 0.09186(15) 0.0666(9) Uani 1 1 d . . . 
C5 C 0.3642(3) 0.3260(4) 0.13320(11) 0.0488(7) Uani 1 1 d . . . 
C6 C 0.5387(3) 0.5247(4) 0.16357(12) 0.0535(7) Uani 1 1 d . . . 
C7 C 0.6021(3) 0.6816(4) 0.14732(16) 0.0602(8) Uani 1 1 d . . . 
C8 C 0.7549(3) 0.6627(4) 0.14190(14) 0.0585(8) Uani 1 1 d . . . 
C9 C 0.7907(3) 0.5493(5) 0.09573(15) 0.0586(8) Uani 1 1 d . . . 
C10 C 0.9419(3) 0.5240(5) 0.08966(16) 0.0604(8) Uani 1 1 d . . . 
C11 C 1.0121(3) 0.6587(4) 0.06019(12) 0.0539(7) Uani 1 1 d . . . 
C12 C 1.2357(3) 0.7203(3) 0.02139(11) 0.0467(7) Uani 1 1 d . . . 
C13 C 1.2007(3) 0.8562(4) -0.00928(13) 0.0556(8) Uani 1 1 d . . . 
C14 C 1.2989(4) 0.9279(4) -0.03969(13) 0.0620(8) Uani 1 1 d . . . 
C15 C 1.4267(4) 0.8634(4) -0.03956(13) 0.0614(8) Uani 1 1 d . . . 
C16 C 1.4533(3) 0.7318(4) -0.00738(13) 0.0577(8) Uani 1 1 d . . . 
C17 C 0.1754(4) -0.2756(6) 0.27174(17) 0.0812(11) Uani 1 1 d . . . 
Cl1 Cl 0.2235(6) -0.3571(5) 0.21171(17) 0.1272(15) Uani 0.50 1 d P . . 
Cl2 Cl 0.1822(7) -0.3865(7) 0.3282(2) 0.177(3) Uani 0.50 1 d P . . 
Cl3 Cl 0.0141(5) -0.1986(6) 0.2603(2) 0.1319(19) Uani 0.50 1 d P . . 
Cl1' Cl 0.2543(8) -0.4351(9) 0.2388(4) 0.267(5) Uani 0.50 1 d P . . 
Cl2' Cl 0.1271(9) -0.3638(8) 0.3326(2) 0.200(4) Uani 0.50 1 d P . . 
Cl3' Cl 0.0421(9) -0.2089(9) 0.2395(4) 0.279(5) Uani 0.50 1 d P . . 
D D 0.239(5) -0.194(6) 0.2772(19) 0.115(16) Uiso 1 1 d . . . 
H2N H 0.418(3) 0.525(4) 0.1016(12) 0.043(8) Uiso 1 1 d . . . 
H3N H 1.168(3) 0.547(4) 0.0617(13) 0.051(9) Uiso 1 1 d . . . 
H1 H 0.470(4) 0.218(4) 0.2002(15) 0.081(11) Uiso 1 1 d . . . 
H2 H 0.330(4) -0.017(5) 0.1935(16) 0.084(11) Uiso 1 1 d . . . 
H3 H 0.162(4) -0.042(5) 0.1217(15) 0.079(11) Uiso 1 1 d . . . 
H4 H 0.128(4) 0.174(4) 0.0626(15) 0.069(10) Uiso 1 1 d . . . 
H7A H 0.560(3) 0.716(4) 0.1119(15) 0.068(9) Uiso 1 1 d . . . 
H7B H 0.584(3) 0.764(4) 0.1795(14) 0.071(10) Uiso 1 1 d . . . 
H8A H 0.789(3) 0.622(4) 0.1791(15) 0.074(10) Uiso 1 1 d . . . 
H8B H 0.796(3) 0.769(5) 0.1337(14) 0.071(10) Uiso 1 1 d . . . 
H9A H 0.746(4) 0.435(5) 0.1033(15) 0.085(11) Uiso 1 1 d . . . 
H9B H 0.754(3) 0.583(4) 0.0609(15) 0.066(10) Uiso 1 1 d . . . 
H10A H 0.963(3) 0.425(4) 0.0703(14) 0.067(10) Uiso 1 1 d . . . 
H10B H 0.981(3) 0.516(4) 0.1246(16) 0.070(10) Uiso 1 1 d . . . 
H13 H 1.112(3) 0.892(4) -0.0111(13) 0.063(9) Uiso 1 1 d . . . 
H14 H 1.274(4) 1.025(5) -0.0611(15) 0.078(10) Uiso 1 1 d . . . 
H15 H 1.496(4) 0.909(4) -0.0615(14) 0.073(10) Uiso 1 1 d . . . 
H16 H 1.543(4) 0.685(4) -0.0056(15) 0.078(11) Uiso 1 1 d . . . 
  
loop_ 
 _atom_site_aniso_label 
 _atom_site_aniso_U_11 
 _atom_site_aniso_U_22 
 _atom_site_aniso_U_33 
 _atom_site_aniso_U_23 
 _atom_site_aniso_U_13 
 _atom_site_aniso_U_12 
O1 0.0581(13) 0.0919(17) 0.0587(13) 0.0092(12) -0.0121(10) -0.0058(12) 
O2 0.0549(13) 0.0777(17) 0.112(2) 0.0355(15) 0.0155(13) 0.0195(12) 
N1 0.0504(13) 0.0576(16) 0.0588(14) 0.0028(12) -0.0079(11) 0.0014(12) 
N2 0.0437(13) 0.0583(15) 0.0482(13) 0.0058(12) -0.0024(10) 0.0014(12) 
N3 0.0436(13) 0.0526(16) 0.0633(15) 0.0137(13) 0.0026(11) 0.0045(12) 
N4 0.0438(13) 0.0592(15) 0.0548(14) 0.0051(12) 0.0018(10) 0.0023(11) 
C1 0.065(2) 0.071(2) 0.0537(18) 0.0121(16) -0.0058(15) -0.0034(17) 
C2 0.089(3) 0.070(2) 0.064(2) 0.0197(18) -0.0027(19) -0.009(2) 
C3 0.080(2) 0.062(2) 0.075(2) 0.0037(18) -0.0004(19) -0.0131(19) 
C4 0.067(2) 0.063(2) 0.069(2) 0.0005(17) -0.0143(17) -0.0037(17) 
C5 0.0456(15) 0.0557(17) 0.0452(14) -0.0007(13) 0.0046(12) 0.0030(13) 
C6 0.0399(14) 0.0681(19) 0.0525(16) -0.0027(15) 0.0015(13) 0.0039(14) 
C7 0.0485(17) 0.061(2) 0.071(2) -0.0051(17) -0.0017(15) 0.0006(15) 
C8 0.0472(16) 0.064(2) 0.064(2) -0.0038(16) -0.0036(14) -0.0092(15) 
C9 0.0454(16) 0.067(2) 0.0633(19) -0.0026(16) 0.0006(14) -0.0053(15) 
C10 0.0498(17) 0.063(2) 0.068(2) 0.0070(18) 0.0062(16) 0.0024(15) 
C11 0.0460(16) 0.0601(19) 0.0555(16) 0.0068(14) 0.0005(13) 0.0043(15) 
C12 0.0452(15) 0.0493(16) 0.0453(14) 0.0007(12) -0.0014(11) -0.0014(13) 
C13 0.0530(18) 0.0556(18) 0.0580(17) 0.0057(14) -0.0016(14) 0.0017(15) 
C14 0.071(2) 0.0556(19) 0.0588(18) 0.0078(15) 0.0018(16) -0.0024(17) 
C15 0.065(2) 0.063(2) 0.0574(18) 0.0011(16) 0.0122(15) -0.0101(17) 
C16 0.0479(17) 0.065(2) 0.0602(18) -0.0012(16) 0.0081(14) -0.0022(16) 
C17 0.074(2) 0.089(3) 0.081(2) -0.010(2) 0.0005(19) -0.014(2) 
Cl1 0.157(3) 0.101(2) 0.129(2) -0.0558(19) 0.070(2) -0.036(2) 
Cl2 0.227(5) 0.152(4) 0.145(4) 0.091(4) -0.092(4) -0.028(3) 
Cl3 0.0903(19) 0.138(3) 0.166(4) -0.057(3) -0.016(2) 0.048(2) 
Cl1' 0.187(5) 0.204(7) 0.423(12) -0.162(7) 0.192(8) -0.037(5) 
Cl2' 0.364(10) 0.141(4) 0.100(3) -0.034(3) 0.082(4) -0.028(5) 
Cl3' 0.271(9) 0.200(7) 0.349(10) 0.159(7) -0.213(7) -0.079(5) 
  
_geom_special_details 
; 
 All esds (except the esd in the dihedral angle between two l.s. planes) 
 are estimated using the full covariance matrix.  The cell esds are taken 
 into account individually in the estimation of esds in distances, angles 
 and torsion angles; correlations between esds in cell parameters are only 
 used when they are defined by crystal symmetry.  An approximate (isotropic) 
 treatment of cell esds is used for estimating esds involving l.s. planes. 
; 
  
loop_ 
 _geom_bond_atom_site_label_1 
 _geom_bond_atom_site_label_2 
 _geom_bond_distance 
 _geom_bond_site_symmetry_2 
 _geom_bond_publ_flag 
O1 C6 1.225(3) . ? 
O2 C11 1.216(4) . ? 
N1 C4 1.337(4) . ? 
N1 C5 1.339(4) . ? 
N2 H2N 0.83(3) . ? 
N2 C6 1.359(4) . ? 
N2 C5 1.399(4) . ? 
N3 H3N 0.76(3) . ? 
N3 C11 1.357(4) . ? 
N3 C12 1.397(4) . ? 
N4 C12 1.334(4) . ? 
N4 C16 1.342(4) . ? 
C1 H1 1.03(4) . ? 
C1 C2 1.374(5) . ? 
C1 C5 1.378(4) . ? 
C2 H2 0.94(4) . ? 
C2 C3 1.380(5) . ? 
C3 H3 0.94(4) . ? 
C3 C4 1.365(5) . ? 
C4 H4 0.95(4) . ? 
C6 C7 1.504(5) . ? 
C7 H7A 0.98(3) . ? 
C7 H7B 1.06(4) . ? 
C7 C8 1.529(4) . ? 
C8 H8B 0.99(4) . ? 
C8 H8A 1.01(4) . ? 
C8 C9 1.512(5) . ? 
C9 H9B 0.95(3) . ? 
C9 H9A 1.07(4) . ? 
C9 C10 1.523(4) . ? 
C10 H10B 0.92(4) . ? 
C10 H10A 0.97(4) . ? 
C10 C11 1.508(4) . ? 
C12 C13 1.387(4) . ? 
C13 H13 0.92(3) . ? 
C13 C14 1.374(5) . ? 
C14 H14 0.98(4) . ? 
C14 C15 1.373(5) . ? 
C15 H15 0.96(4) . ? 
C15 C16 1.362(5) . ? 
C16 H16 0.97(4) . ? 
C17 Cl3' 1.607(7) . ? 
C17 Cl2 1.646(6) . ? 
C17 Cl1 1.686(6) . ? 
C17 Cl2' 1.726(7) . ? 
C17 Cl3 1.732(6) . ? 
C17 Cl1' 1.743(7) . ? 
Cl1 Cl1' 0.963(11) . ? 
Cl1 Cl3' 2.295(12) . ? 
Cl2 Cl2' 0.590(12) . ? 
Cl2 Cl1' 2.335(10) . ? 
Cl3 Cl3' 0.590(13) . ? 
Cl3 Cl2' 2.459(9) . ? 
  
loop_ 
 _geom_angle_atom_site_label_1 
 _geom_angle_atom_site_label_2 
 _geom_angle_atom_site_label_3 
 _geom_angle 
 _geom_angle_site_symmetry_1 
 _geom_angle_site_symmetry_3 
 _geom_angle_publ_flag 
C4 N1 C5 117.3(3) . . ? 
H2N N2 C6 116(2) . . ? 
H2N N2 C5 115(2) . . ? 
C6 N2 C5 128.1(3) . . ? 
H3N N3 C11 113(2) . . ? 
H3N N3 C12 118(2) . . ? 
C11 N3 C12 129.0(3) . . ? 
C12 N4 C16 117.4(3) . . ? 
H1 C1 C2 121(2) . . ? 
H1 C1 C5 120(2) . . ? 
C2 C1 C5 118.2(3) . . ? 
H2 C2 C1 121(2) . . ? 
H2 C2 C3 119(2) . . ? 
C1 C2 C3 120.1(3) . . ? 
H3 C3 C4 118(2) . . ? 
H3 C3 C2 124(2) . . ? 
C4 C3 C2 117.6(4) . . ? 
H4 C4 N1 114(2) . . ? 
H4 C4 C3 122(2) . . ? 
N1 C4 C3 124.0(3) . . ? 
N1 C5 C1 122.8(3) . . ? 
N1 C5 N2 112.2(2) . . ? 
C1 C5 N2 125.0(3) . . ? 
O1 C6 N2 122.8(3) . . ? 
O1 C6 C7 121.3(3) . . ? 
N2 C6 C7 115.9(3) . . ? 
H7A C7 H7B 112(3) . . ? 
H7A C7 C6 108(2) . . ? 
H7B C7 C6 106.5(19) . . ? 
H7A C7 C8 110(2) . . ? 
H7B C7 C8 108.9(18) . . ? 
C6 C7 C8 110.8(3) . . ? 
H8B C8 H8A 110(3) . . ? 
H8B C8 C9 107(2) . . ? 
H8A C8 C9 112(2) . . ? 
H8B C8 C7 110(2) . . ? 
H8A C8 C7 105(2) . . ? 
C9 C8 C7 112.7(3) . . ? 
H9B C9 H9A 106(3) . . ? 
H9B C9 C8 112(2) . . ? 
H9A C9 C8 108(2) . . ? 
H9B C9 C10 107(2) . . ? 
H9A C9 C10 108(2) . . ? 
C8 C9 C10 114.4(3) . . ? 
H10B C10 H10A 107(3) . . ? 
H10B C10 C11 108(2) . . ? 
H10A C10 C11 107(2) . . ? 
H10B C10 C9 108(2) . . ? 
H10A C10 C9 113(2) . . ? 
C11 C10 C9 114.4(3) . . ? 
O2 C11 N3 123.0(3) . . ? 
O2 C11 C10 123.1(3) . . ? 
N3 C11 C10 113.9(3) . . ? 
N4 C12 C13 122.7(3) . . ? 
N4 C12 N3 113.1(2) . . ? 
C13 C12 N3 124.3(3) . . ? 
H13 C13 C14 122(2) . . ? 
H13 C13 C12 120(2) . . ? 
C14 C13 C12 118.1(3) . . ? 
H14 C14 C15 122(2) . . ? 
H14 C14 C13 118(2) . . ? 
C15 C14 C13 119.8(3) . . ? 
H15 C15 C16 120(2) . . ? 
H15 C15 C14 121(2) . . ? 
C16 C15 C14 118.3(3) . . ? 
H16 C16 N4 116(2) . . ? 
H16 C16 C15 120(2) . . ? 
N4 C16 C15 123.6(3) . . ? 
Cl3' C17 Cl2 127.2(5) . . ? 
Cl3' C17 Cl1 88.3(5) . . ? 
Cl2 C17 Cl1 119.1(4) . . ? 
Cl3' C17 Cl2' 108.3(5) . . ? 
Cl2 C17 Cl2' 20.0(4) . . ? 
Cl1 C17 Cl2' 131.2(4) . . ? 
Cl3' C17 Cl3 19.9(5) . . ? 
Cl2 C17 Cl3 110.4(4) . . ? 
Cl1 C17 Cl3 107.3(3) . . ? 
Cl2' C17 Cl3 90.6(4) . . ? 
Cl3' C17 Cl1' 114.4(6) . . ? 
Cl2 C17 Cl1' 87.1(5) . . ? 
Cl1 C17 Cl1' 32.6(4) . . ? 
Cl2' C17 Cl1' 102.1(4) . . ? 
Cl3 C17 Cl1' 129.2(4) . . ? 
Cl1' Cl1 C17 77.0(5) . . ? 
Cl1' Cl1 Cl3' 113.1(6) . . ? 
C17 Cl1 Cl3' 44.4(3) . . ? 
Cl2' Cl2 C17 87.7(9) . . ? 
Cl2' Cl2 Cl1' 122.4(9) . . ? 
C17 Cl2 Cl1' 48.2(3) . . ? 
Cl3' Cl3 C17 68.0(9) . . ? 
Cl3' Cl3 Cl2' 108.2(9) . . ? 
C17 Cl3 Cl2' 44.6(3) . . ? 
Cl1 Cl1' C17 70.4(5) . . ? 
Cl1 Cl1' Cl2 114.5(6) . . ? 
C17 Cl1' Cl2 44.7(3) . . ? 
Cl2 Cl2' C17 72.3(9) . . ? 
Cl2 Cl2' Cl3 116.7(10) . . ? 
C17 Cl2' Cl3 44.8(2) . . ? 
Cl3 Cl3' C17 92.0(10) . . ? 
Cl3 Cl3' Cl1 136.3(10) . . ? 
C17 Cl3' Cl1 47.2(3) . . ? 
  
_diffrn_measured_fraction_theta_max    0.987 
_diffrn_reflns_theta_full              25.00 
_diffrn_measured_fraction_theta_full   0.987 
_refine_diff_density_max    0.612 
_refine_diff_density_min   -0.364 
_refine_diff_density_rms    0.050 
  
#===END

data_2 
 
_audit_creation_method            SHELXL-97 
_chemical_name_systematic 
; 
 ? 
; 
_chemical_name_common             ? 
_chemical_melting_point           ? 
_chemical_formula_moiety          ? 
_chemical_formula_sum 
 'C16 H22 N4 O4' 
_chemical_formula_weight          334.38 
 
loop_ 
 _atom_type_symbol 
 _atom_type_description 
 _atom_type_scat_dispersion_real 
 _atom_type_scat_dispersion_imag 
 _atom_type_scat_source 
 'C'  'C'   0.0033   0.0016 
 'International Tables Vol C Tables 4.2.6.8 and 6.1.1.4' 
 'H'  'H'   0.0000   0.0000 
 'International Tables Vol C Tables 4.2.6.8 and 6.1.1.4' 
 'N'  'N'   0.0061   0.0033 
 'International Tables Vol C Tables 4.2.6.8 and 6.1.1.4' 
 'O'  'O'   0.0106   0.0060 
 'International Tables Vol C Tables 4.2.6.8 and 6.1.1.4' 
 
_symmetry_cell_setting            monoclinic 
_symmetry_space_group_name_H-M    P2(1)/c
 
loop_ 
 _symmetry_equiv_pos_as_xyz 
 'x, y, z' 
 '-x, y+1/2, -z+1/2' 
 '-x, -y, -z' 
 'x, -y-1/2, z-1/2' 

_cell_length_a                    10.909(2)
_cell_length_b                    5.2417(12) 
_cell_length_c                    14.816(3) 
_cell_angle_alpha                 90.00 
_cell_angle_beta                  99.742(17) 
_cell_angle_gamma                 90.00 
_cell_volume                      835.0(3) 
_cell_formula_units_Z             2 
_cell_measurement_temperature     295(2)
_cell_measurement_reflns_used      27
_cell_measurement_theta_min        5.08
_cell_measurement_theta_max       12.47
 
_exptl_crystal_description        plate 
_exptl_crystal_colour             colorless 
_exptl_crystal_size_max           0.7 
_exptl_crystal_size_mid           0.3 
_exptl_crystal_size_min           0.1
_exptl_crystal_density_meas       ? 
_exptl_crystal_density_diffrn     1.330 
_exptl_crystal_density_method     'not measured' 
_exptl_crystal_F_000              356 
_exptl_absorpt_coefficient_mu     0.097 
_exptl_absorpt_correction_type   'empirical'
_exptl_absorpt_correction_T_min  0.2484
_exptl_absorpt_correction_T_max  0.3209
_exptl_absorpt_process_details    ? 
 
_exptl_special_details 
; 
 ? 
; 
 
_diffrn_ambient_temperature       295(2) 
_diffrn_radiation_wavelength      0.71073 
_diffrn_radiation_type           'MoK\a'
_diffrn_radiation_source         'sealed tube'
_diffrn_radiation_monochromator  'graphite'
_diffrn_measurement_device_type  'Bruker P4'
_diffrn_measurement_method       '\w scans'
_diffrn_detector_area_resol_mean ?
_diffrn_standards_number            3
_diffrn_standards_interval_count   97
_diffrn_standards_interval_time   ? 
_diffrn_standards_decay_%         ? 
_diffrn_reflns_number             2105 
_diffrn_reflns_av_R_equivalents   0.0313 
_diffrn_reflns_av_sigmaI/netI     0.0331 
_diffrn_reflns_limit_h_min        -1 
_diffrn_reflns_limit_h_max        12 
_diffrn_reflns_limit_k_min        -6 
_diffrn_reflns_limit_k_max        1 
_diffrn_reflns_limit_l_min        -17 
_diffrn_reflns_limit_l_max        17 
_diffrn_reflns_theta_min          1.89 
_diffrn_reflns_theta_max          24.99 
_reflns_number_total              1462 
_reflns_number_gt                 1155 
_reflns_threshold_expression      >2sigma(I) 
 
_computing_data_collection      'Bruker XSCANS'
_computing_cell_refinement      'Bruker XSCANS'
_computing_data_reduction       'Bruker SHELXTL'
_computing_structure_solution   'Bruker SHELXTL'
_computing_structure_refinement 'Bruker SHELXTL'
_computing_molecular_graphics   'Bruker SHELXTL'
_computing_publication_material 'Bruker SHELXTL'
 
_refine_special_details 
; 
 Refinement of F^2^ against ALL reflections.  The weighted R-factor wR and 
 goodness of fit S are based on F^2^, conventional R-factors R are based 
 on F, with F set to zero for negative F^2^. The threshold expression of 
 F^2^ > 2sigma(F^2^) is used only for calculating R-factors(gt) etc. and is 
 not relevant to the choice of reflections for refinement.  R-factors based 
 on F^2^ are statistically about twice as large as those based on F, and R- 
 factors based on ALL data will be even larger. 
; 
 
_refine_ls_structure_factor_coef  Fsqd  
_refine_ls_matrix_type            full 
_refine_ls_weighting_scheme       calc  
_refine_ls_weighting_details 
 'calc w=1/[\s^2^(Fo^2^)+(0.0600P)^2^+0.2785P] where P=(Fo^2^+2Fc^2^)/3' 
_atom_sites_solution_primary      direct 
_atom_sites_solution_secondary    difmap 
_atom_sites_solution_hydrogens    geom 
_refine_ls_hydrogen_treatment     mixed 
_refine_ls_extinction_method      SHELXL 
_refine_ls_extinction_coef        0.020(5) 
_refine_ls_extinction_expression 
 'Fc^*^=kFc[1+0.001xFc^2^\l^3^/sin(2\q)]^-1/4^' 
_refine_ls_number_reflns          1462 
_refine_ls_number_parameters      154 
_refine_ls_number_restraints      0 
_refine_ls_R_factor_all           0.0632 
_refine_ls_R_factor_gt            0.0474 
_refine_ls_wR_factor_ref          0.1282 
_refine_ls_wR_factor_gt           0.1146 
_refine_ls_goodness_of_fit_ref    1.083 
_refine_ls_restrained_S_all       1.083 
_refine_ls_shift/su_max           0.000 
_refine_ls_shift/su_mean          0.000 
 
loop_ 
 _atom_site_label 
 _atom_site_type_symbol 
 _atom_site_fract_x 
 _atom_site_fract_y 
 _atom_site_fract_z 
 _atom_site_U_iso_or_equiv 
 _atom_site_adp_type 
 _atom_site_occupancy 
 _atom_site_symmetry_multiplicity 
 _atom_site_calc_flag 
 _atom_site_refinement_flags 
 _atom_site_disorder_assembly 
 _atom_site_disorder_group 
O1 O 0.77109(13) 0.0529(3) 0.89144(10) 0.0562(5) Uani 1 1 d . . . 
O2 O 0.96130(18) -0.0437(4) 0.77696(15) 0.0734(6) Uani 1 1 d . . . 
N1 N 0.40936(14) 0.2770(3) 0.90886(11) 0.0444(5) Uani 1 1 d . . . 
N2 N 0.62059(14) 0.2601(3) 0.95202(11) 0.0410(5) Uani 1 1 d . . . 
C1 C 0.3038(2) 0.1871(5) 0.86012(16) 0.0551(6) Uani 1 1 d . . . 
C2 C 0.2956(2) -0.0290(5) 0.80811(15) 0.0546(6) Uani 1 1 d . . . 
C3 C 0.4022(2) -0.1682(4) 0.80818(13) 0.0473(6) Uani 1 1 d . . . 
C4 C 0.51301(19) -0.0812(4) 0.85645(13) 0.0422(5) Uani 1 1 d . . . 
C5 C 0.51278(17) 0.1457(4) 0.90439(12) 0.0366(5) Uani 1 1 d . . . 
C6 C 0.74080(17) 0.2173(4) 0.94226(13) 0.0429(5) Uani 1 1 d . . . 
C7 C 0.8319(2) 0.3928(6) 0.99918(18) 0.0574(7) Uani 1 1 d . . . 
C8 C 0.95700(19) 0.4093(5) 0.97044(16) 0.0506(6) Uani 1 1 d . . . 
H2O1 H 0.988(4) 0.110(8) 0.760(2) 0.117(13) Uiso 1 1 d . . . 
H2O2 H 0.913(3) -0.027(6) 0.812(2) 0.080(9) Uiso 1 1 d . . . 
H2N H 0.6108(19) 0.390(4) 0.9860(15) 0.045(6) Uiso 1 1 d . . . 
H1 H 0.233(3) 0.288(6) 0.8618(18) 0.083(8) Uiso 1 1 d . . . 
H2 H 0.222(2) -0.076(5) 0.7764(16) 0.065(7) Uiso 1 1 d . . . 
H3 H 0.400(2) -0.325(5) 0.7753(15) 0.054(6) Uiso 1 1 d . . . 
H4 H 0.589(2) -0.177(4) 0.8593(14) 0.050(6) Uiso 1 1 d . . . 
H7A H 0.796(3) 0.574(7) 0.994(2) 0.112(12) Uiso 1 1 d . . . 
H7B H 0.839(3) 0.338(5) 1.0625(19) 0.082(8) Uiso 1 1 d . . . 
H8A H 0.992(3) 0.249(6) 0.9727(17) 0.076(9) Uiso 1 1 d . . . 
H8B H 0.940(3) 0.460(5) 0.9062(19) 0.076(8) Uiso 1 1 d . . . 

loop_ 
 _atom_site_aniso_label 
 _atom_site_aniso_U_11 
 _atom_site_aniso_U_22 
 _atom_site_aniso_U_33 
 _atom_site_aniso_U_23 
 _atom_site_aniso_U_13 
 _atom_site_aniso_U_12 
O1 0.0381(8) 0.0646(10) 0.0697(10) -0.0218(8) 0.0204(7) -0.0051(7) 
O2 0.0677(12) 0.0660(12) 0.0971(14) -0.0132(11) 0.0442(11) -0.0003(10) 
N1 0.0346(8) 0.0492(10) 0.0493(9) -0.0080(8) 0.0069(7) 0.0010(7) 
N2 0.0319(8) 0.0467(10) 0.0466(9) -0.0107(8) 0.0133(7) -0.0046(7) 
C1 0.0370(11) 0.0676(15) 0.0590(13) -0.0171(12) 0.0029(9) 0.0039(11) 
C2 0.0399(11) 0.0705(15) 0.0522(12) -0.0175(11) 0.0045(9) -0.0094(11) 
C3 0.0521(12) 0.0501(12) 0.0426(11) -0.0101(10) 0.0167(9) -0.0115(10) 
C4 0.0401(11) 0.0454(11) 0.0449(10) -0.0028(9) 0.0182(8) -0.0021(9) 
C5 0.0340(9) 0.0430(11) 0.0347(9) 0.0022(8) 0.0116(7) -0.0040(8) 
C6 0.0355(10) 0.0512(12) 0.0450(10) -0.0028(9) 0.0151(8) -0.0049(9) 
C7 0.0380(11) 0.0743(17) 0.0633(14) -0.0191(13) 0.0183(10) -0.0140(12) 
C8 0.0355(11) 0.0617(15) 0.0574(13) -0.0100(11) 0.0155(9) -0.0062(10) 
 
_geom_special_details 
; 
 All esds (except the esd in the dihedral angle between two l.s. planes) 
 are estimated using the full covariance matrix.  The cell esds are taken 
 into account individually in the estimation of esds in distances, angles 
 and torsion angles; correlations between esds in cell parameters are only 
 used when they are defined by crystal symmetry.  An approximate (isotropic) 
 treatment of cell esds is used for estimating esds involving l.s. planes. 
; 
 
loop_ 
 _geom_bond_atom_site_label_1 
 _geom_bond_atom_site_label_2 
 _geom_bond_distance 
 _geom_bond_site_symmetry_2 
 _geom_bond_publ_flag 
O1 C6 1.226(2) . ? 
O2 H2O1 0.91(4) . ? 
O2 H2O2 0.80(3) . ? 
N1 C5 1.333(3) . ? 
N1 C1 1.338(3) . ? 
N2 C6 1.362(2) . ? 
N2 C5 1.400(2) . ? 
N2 H2N 0.86(2) . ? 
C1 C2 1.365(3) . ? 
C1 H1 0.94(3) . ? 
C2 C3 1.373(3) . ? 
C2 H2 0.89(2) . ? 
C3 C4 1.374(3) . ? 
C3 H3 0.95(3) . ? 
C4 C5 1.386(3) . ? 
C4 H4 0.96(2) . ? 
C6 C7 1.504(3) . ? 
C7 C8 1.499(3) . ? 
C7 H7A 1.03(4) . ? 
C7 H7B 0.97(3) . ? 
C8 C8 1.508(5) 3_767 ? 
C8 H8A 0.92(3) . ? 
C8 H8B 0.97(3) . ? 
 
loop_ 
 _geom_angle_atom_site_label_1 
 _geom_angle_atom_site_label_2 
 _geom_angle_atom_site_label_3 
 _geom_angle 
 _geom_angle_site_symmetry_1 
 _geom_angle_site_symmetry_3 
 _geom_angle_publ_flag 
H2O1 O2 H2O2 111(3) . . ? 
C5 N1 C1 116.75(18) . . ? 
C6 N2 C5 128.16(18) . . ? 
C6 N2 H2N 114.1(14) . . ? 
C5 N2 H2N 117.0(14) . . ? 
N1 C1 C2 124.4(2) . . ? 
N1 C1 H1 115.2(17) . . ? 
C2 C1 H1 120.4(17) . . ? 
C1 C2 C3 117.8(2) . . ? 
C1 C2 H2 119.4(16) . . ? 
C3 C2 H2 122.8(16) . . ? 
C2 C3 C4 119.7(2) . . ? 
C2 C3 H3 120.6(14) . . ? 
C4 C3 H3 119.7(14) . . ? 
C3 C4 C5 118.28(19) . . ? 
C3 C4 H4 121.6(13) . . ? 
C5 C4 H4 120.1(13) . . ? 
N1 C5 C4 122.94(18) . . ? 
N1 C5 N2 113.57(17) . . ? 
C4 C5 N2 123.49(18) . . ? 
O1 C6 N2 123.05(19) . . ? 
O1 C6 C7 123.57(18) . . ? 
N2 C6 C7 113.37(18) . . ? 
C8 C7 C6 115.04(19) . . ? 
C8 C7 H7A 106(2) . . ? 
C6 C7 H7A 108.4(19) . . ? 
C8 C7 H7B 111.2(17) . . ? 
C6 C7 H7B 107.3(17) . . ? 
H7A C7 H7B 109(3) . . ? 
C7 C8 C8 112.2(2) . 3_767 ? 
C7 C8 H8A 109.4(18) . . ? 
C8 C8 H8A 109.7(17) 3_767 . ? 
C7 C8 H8B 105.4(16) . . ? 
C8 C8 H8B 113.0(17) 3_767 . ? 
H8A C8 H8B 107(2) . . ? 
 
_diffrn_measured_fraction_theta_max    0.996 
_diffrn_reflns_theta_full              24.99 
_diffrn_measured_fraction_theta_full   0.996 
_refine_diff_density_max    0.161 
_refine_diff_density_min   -0.183 
_refine_diff_density_rms    0.046 

#===END

data_3 
 
  
_audit_creation_method            SHELXL-97 
_chemical_name_systematic 
; 
 ? 
; 
_chemical_name_common             ? 
_chemical_melting_point           ? 
_chemical_formula_moiety          ? 
_chemical_formula_sum 
 'C16 H18 Ag N5 O5' 
_chemical_formula_weight          468.22 
  
loop_ 
 _atom_type_symbol 
 _atom_type_description 
 _atom_type_scat_dispersion_real 
 _atom_type_scat_dispersion_imag 
 _atom_type_scat_source 
 'C'  'C'   0.0033   0.0016 
 'International Tables Vol C Tables 4.2.6.8 and 6.1.1.4' 
 'H'  'H'   0.0000   0.0000 
 'International Tables Vol C Tables 4.2.6.8 and 6.1.1.4' 
 'N'  'N'   0.0061   0.0033 
 'International Tables Vol C Tables 4.2.6.8 and 6.1.1.4' 
 'O'  'O'   0.0106   0.0060 
 'International Tables Vol C Tables 4.2.6.8 and 6.1.1.4' 
 'Ag'  'Ag'  -0.8971   1.1015 
 'International Tables Vol C Tables 4.2.6.8 and 6.1.1.4' 
  
_symmetry_cell_setting            Triclinic 
_symmetry_space_group_name_H-M    P-1 
  
loop_ 
 _symmetry_equiv_pos_as_xyz 
 'x, y, z' 
 '-x, -y, -z' 
  
_cell_length_a                    8.3486(12) 
_cell_length_b                    9.9271(10) 
_cell_length_c                    11.5278(11) 
_cell_angle_alpha                 99.612(7) 
_cell_angle_beta                  104.505(9) 
_cell_angle_gamma                 103.956(10) 
_cell_volume                      870.95(17) 
_cell_formula_units_Z             2 
_cell_measurement_temperature     295(2) 
_cell_measurement_reflns_used     26 
_cell_measurement_theta_min       4.67 
_cell_measurement_theta_max       12.46 
  
_exptl_crystal_description        PLATE 
_exptl_crystal_colour             COLORLESS 
_exptl_crystal_size_max           0.8 
_exptl_crystal_size_mid           0.4 
_exptl_crystal_size_min           0.1 
_exptl_crystal_density_meas       ? 
_exptl_crystal_density_diffrn     1.785 
_exptl_crystal_density_method     'not measured' 
_exptl_crystal_F_000              472 
_exptl_absorpt_coefficient_mu     1.198 
_exptl_absorpt_correction_type    empirical 
_exptl_absorpt_correction_T_min   0.7683 
_exptl_absorpt_correction_T_max   0.9846 
_exptl_absorpt_process_details    ? 
  
_exptl_special_details 
; 
 ? 
; 
  
_diffrn_ambient_temperature       295(2) 
_diffrn_radiation_wavelength      0.71073 
_diffrn_radiation_type            MoK\a 
_diffrn_radiation_source          'fine-focus sealed tube' 
_diffrn_radiation_monochromator   graphite 
_diffrn_measurement_device_type   'Bruker P4' 
_diffrn_measurement_method        '\w scans' 
_diffrn_detector_area_resol_mean  ? 
_diffrn_standards_number          3 
_diffrn_standards_interval_count  97 
_diffrn_standards_interval_time   ? 
_diffrn_standards_decay_%         ? 
_diffrn_reflns_number             3736 
_diffrn_reflns_av_R_equivalents   0.0147 
_diffrn_reflns_av_sigmaI/netI     0.0234 
_diffrn_reflns_limit_h_min        -9 
_diffrn_reflns_limit_h_max        1 
_diffrn_reflns_limit_k_min        -11 
_diffrn_reflns_limit_k_max        11 
_diffrn_reflns_limit_l_min        -13 
_diffrn_reflns_limit_l_max        13 
_diffrn_reflns_theta_min          1.88 
_diffrn_reflns_theta_max          25.00 
_reflns_number_total              3045 
_reflns_number_gt                 2852 
_reflns_threshold_expression      >2sigma(I) 
  
_computing_data_collection        'Bruker XSCANS' 
_computing_cell_refinement        'Bruker XSCANS' 
_computing_data_reduction         'Bruker SHELXTL' 
_computing_structure_solution     'SHELXS-97 (Sheldrick, 1990)' 
_computing_structure_refinement   'SHELXL-97 (Sheldrick, 1997)' 
_computing_molecular_graphics     'Bruker SHELXTL' 
_computing_publication_material   'Bruker SHELXTL' 
  
_refine_special_details 
; 
 Refinement of F^2^ against ALL reflections.  The weighted R-factor wR and 
 goodness of fit S are based on F^2^, conventional R-factors R are based 
 on F, with F set to zero for negative F^2^. The threshold expression of 
 F^2^ > 2sigma(F^2^) is used only for calculating R-factors(gt) etc. and is 
 not relevant to the choice of reflections for refinement.  R-factors based 
 on F^2^ are statistically about twice as large as those based on F, and R- 
 factors based on ALL data will be even larger. 
; 
  
_refine_ls_structure_factor_coef  Fsqd 
_refine_ls_matrix_type            full 
_refine_ls_weighting_scheme       calc 
_refine_ls_weighting_details 
 'calc w=1/[\s^2^(Fo^2^)+(0.0000P)^2^+1.4389P] where P=(Fo^2^+2Fc^2^)/3' 
_atom_sites_solution_primary      direct 
_atom_sites_solution_secondary    difmap 
_atom_sites_solution_hydrogens    geom 
_refine_ls_hydrogen_treatment     mixed 
_refine_ls_extinction_method      none 
_refine_ls_extinction_coef        ? 
_refine_ls_number_reflns          3045 
_refine_ls_number_parameters      316 
_refine_ls_number_restraints      0 
_refine_ls_R_factor_all           0.0313 
_refine_ls_R_factor_gt            0.0288 
_refine_ls_wR_factor_ref          0.0598 
_refine_ls_wR_factor_gt           0.0585 
_refine_ls_goodness_of_fit_ref    1.016 
_refine_ls_restrained_S_all       1.016 
_refine_ls_shift/su_max           0.000 
_refine_ls_shift/su_mean          0.000 
  
loop_ 
 _atom_site_label 
 _atom_site_type_symbol 
 _atom_site_fract_x 
 _atom_site_fract_y 
 _atom_site_fract_z 
 _atom_site_U_iso_or_equiv 
 _atom_site_adp_type 
 _atom_site_occupancy 
 _atom_site_symmetry_multiplicity 
 _atom_site_calc_flag 
 _atom_site_refinement_flags 
 _atom_site_disorder_assembly 
 _atom_site_disorder_group 
Ag1 Ag 0.33843(3) 0.49950(3) 0.09292(2) 0.05276(9) Uani 1 1 d . . . 
O1 O -0.2385(3) 0.3673(2) -0.3011(2) 0.0548(6) Uani 1 1 d . . . 
O2 O -0.1512(4) -0.3360(3) -0.4767(3) 0.0778(8) Uani 1 1 d . . . 
O3 O 0.6533(3) 0.6722(3) 0.1231(2) 0.0635(7) Uani 1 1 d . . . 
O4 O 0.6011(5) 0.8368(4) 0.2373(3) 0.1128(13) Uani 1 1 d . . . 
O5 O 0.7749(5) 0.8936(4) 0.1372(4) 0.1192(15) Uani 1 1 d . . . 
N1 N 0.1912(3) 0.6196(3) -0.0157(2) 0.0407(5) Uani 1 1 d . . . 
N2 N 0.0449(3) 0.4300(3) -0.1857(2) 0.0419(6) Uani 1 1 d . . . 
H2N H 0.132(5) 0.398(4) -0.165(3) 0.056(10) Uiso 1 1 d . . . 
N3 N -0.4152(4) -0.4247(3) -0.6197(2) 0.0472(6) Uani 1 1 d . . . 
H3N H -0.503(5) -0.404(4) -0.647(3) 0.063(12) Uiso 1 1 d . . . 
N4 N -0.5249(3) -0.6185(3) -0.7873(2) 0.0438(6) Uani 1 1 d . . . 
N5 N 0.6787(4) 0.8027(3) 0.1642(3) 0.0594(8) Uani 1 1 d . . . 
C1 C 0.2241(5) 0.7578(3) 0.0429(3) 0.0516(8) Uani 1 1 d . . . 
H1 H 0.313(4) 0.793(4) 0.121(3) 0.054(10) Uiso 1 1 d . . . 
C2 C 0.1385(5) 0.8465(4) -0.0022(4) 0.0604(9) Uani 1 1 d . . . 
H2 H 0.164(5) 0.938(4) 0.044(4) 0.074(12) Uiso 1 1 d . . . 
C3 C 0.0123(5) 0.7953(4) -0.1152(4) 0.0600(9) Uani 1 1 d . . . 
H3 H -0.051(5) 0.856(4) -0.149(3) 0.072(12) Uiso 1 1 d . . . 
C4 C -0.0238(4) 0.6561(3) -0.1785(3) 0.0482(7) Uani 1 1 d . . . 
H4 H -0.101(4) 0.623(3) -0.254(3) 0.042(9) Uiso 1 1 d . . . 
C5 C 0.0683(4) 0.5710(3) -0.1255(3) 0.0381(6) Uani 1 1 d . . . 
C6 C -0.1024(4) 0.3386(3) -0.2726(3) 0.0436(7) Uani 1 1 d . . . 
C7 C -0.0791(5) 0.2001(4) -0.3298(5) 0.0659(11) Uani 1 1 d . . . 
H7B H -0.020(7) 0.216(5) -0.392(5) 0.116(19) Uiso 1 1 d . . . 
H7A H 0.000(7) 0.165(5) -0.268(5) 0.120(19) Uiso 1 1 d . . . 
C8 C -0.2373(5) 0.0738(4) -0.3818(4) 0.0557(9) Uani 1 1 d . . . 
H8B H -0.295(5) 0.055(4) -0.326(4) 0.071(12) Uiso 1 1 d . . . 
H8A H -0.324(6) 0.098(4) -0.449(4) 0.088(14) Uiso 1 1 d . . . 
C9 C -0.1954(5) -0.0592(4) -0.4339(4) 0.0605(10) Uani 1 1 d . . . 
H9A H -0.096(6) -0.073(5) -0.375(4) 0.096(15) Uiso 1 1 d . . . 
H9B H -0.164(7) -0.041(6) -0.516(5) 0.15(2) Uiso 1 1 d . . . 
C10 C -0.3437(5) -0.1929(4) -0.4806(4) 0.0582(9) Uani 1 1 d . . . 
H10A H -0.441(6) -0.181(4) -0.538(4) 0.085(14) Uiso 1 1 d . . . 
H10B H -0.395(6) -0.208(5) -0.412(5) 0.116(18) Uiso 1 1 d . . . 
C11 C -0.2927(4) -0.3227(3) -0.5240(3) 0.0471(7) Uani 1 1 d . . . 
C12 C -0.4057(4) -0.5567(3) -0.6768(3) 0.0411(7) Uani 1 1 d . . . 
C13 C -0.2857(5) -0.6222(4) -0.6231(3) 0.0527(8) Uani 1 1 d . . . 
H13 H -0.199(5) -0.576(4) -0.550(3) 0.069(12) Uiso 1 1 d . . . 
C14 C -0.2938(5) -0.7559(4) -0.6848(4) 0.0595(9) Uani 1 1 d . . . 
H14 H -0.217(5) -0.805(4) -0.655(3) 0.069(11) Uiso 1 1 d . . . 
C15 C -0.4207(5) -0.8227(4) -0.7955(4) 0.0582(9) Uani 1 1 d . . . 
H15 H -0.427(5) -0.911(4) -0.844(4) 0.076(12) Uiso 1 1 d . . . 
C16 C -0.5311(5) -0.7513(3) -0.8437(3) 0.0530(8) Uani 1 1 d . . . 
H16 H -0.616(5) -0.792(4) -0.920(3) 0.057(10) Uiso 1 1 d . . . 
  
loop_ 
 _atom_site_aniso_label 
 _atom_site_aniso_U_11 
 _atom_site_aniso_U_22 
 _atom_site_aniso_U_33 
 _atom_site_aniso_U_23 
 _atom_site_aniso_U_13 
 _atom_site_aniso_U_12 
Ag1 0.05041(15) 0.05443(16) 0.04820(15) 0.01365(11) 0.00051(11) 0.02031(12) 
O1 0.0392(12) 0.0528(13) 0.0596(14) 0.0011(11) 0.0005(10) 0.0140(10) 
O2 0.0611(17) 0.0596(16) 0.0830(19) -0.0029(14) -0.0183(14) 0.0199(13) 
O3 0.0530(14) 0.0461(14) 0.0801(17) 0.0058(12) 0.0066(13) 0.0150(11) 
O4 0.141(3) 0.119(3) 0.099(3) 0.016(2) 0.039(2) 0.081(3) 
O5 0.102(3) 0.088(2) 0.126(3) 0.053(2) -0.004(2) -0.023(2) 
N1 0.0415(13) 0.0351(13) 0.0396(13) 0.0063(10) 0.0077(11) 0.0075(11) 
N2 0.0364(13) 0.0350(13) 0.0461(14) 0.0013(11) 0.0031(11) 0.0116(11) 
N3 0.0440(15) 0.0415(14) 0.0464(15) 0.0004(11) -0.0013(12) 0.0182(12) 
N4 0.0470(15) 0.0349(13) 0.0447(14) 0.0068(11) 0.0052(12) 0.0143(11) 
N5 0.0567(18) 0.0546(18) 0.0585(18) 0.0157(15) -0.0006(15) 0.0187(15) 
C1 0.058(2) 0.0392(17) 0.0467(18) 0.0012(14) 0.0113(16) 0.0050(15) 
C2 0.077(3) 0.0319(17) 0.069(2) 0.0040(16) 0.023(2) 0.0144(17) 
C3 0.064(2) 0.0430(19) 0.081(3) 0.0224(18) 0.023(2) 0.0259(17) 
C4 0.0488(19) 0.0437(18) 0.0494(19) 0.0132(14) 0.0070(15) 0.0157(15) 
C5 0.0367(15) 0.0340(14) 0.0414(15) 0.0085(12) 0.0098(12) 0.0089(12) 
C6 0.0392(16) 0.0418(16) 0.0423(16) 0.0030(13) 0.0073(13) 0.0085(13) 
C7 0.043(2) 0.047(2) 0.086(3) -0.0176(19) 0.009(2) 0.0091(16) 
C8 0.050(2) 0.0472(19) 0.058(2) -0.0053(16) 0.0137(18) 0.0062(16) 
C9 0.048(2) 0.0440(19) 0.071(2) -0.0087(17) 0.0054(18) 0.0083(16) 
C10 0.052(2) 0.0463(19) 0.064(2) -0.0071(17) 0.0164(18) 0.0060(16) 
C11 0.0463(18) 0.0433(17) 0.0422(16) 0.0055(13) 0.0046(14) 0.0083(14) 
C12 0.0425(16) 0.0369(15) 0.0427(16) 0.0088(12) 0.0106(13) 0.0127(13) 
C13 0.0503(19) 0.053(2) 0.053(2) 0.0163(16) 0.0062(16) 0.0203(16) 
C14 0.065(2) 0.053(2) 0.077(3) 0.0281(19) 0.027(2) 0.0343(19) 
C15 0.073(2) 0.0404(18) 0.068(2) 0.0110(17) 0.029(2) 0.0242(18) 
C16 0.064(2) 0.0378(17) 0.0512(19) 0.0042(15) 0.0123(17) 0.0136(16) 
  
_geom_special_details 
; 
 All esds (except the esd in the dihedral angle between two l.s. planes) 
 are estimated using the full covariance matrix.  The cell esds are taken 
 into account individually in the estimation of esds in distances, angles 
 and torsion angles; correlations between esds in cell parameters are only 
 used when they are defined by crystal symmetry.  An approximate (isotropic) 
 treatment of cell esds is used for estimating esds involving l.s. planes. 
; 
  
loop_ 
 _geom_bond_atom_site_label_1 
 _geom_bond_atom_site_label_2 
 _geom_bond_distance 
 _geom_bond_site_symmetry_2 
 _geom_bond_publ_flag 
Ag1 N1 2.222(2) . ? 
Ag1 N4 2.230(2) 1_666 ? 
O1 C6 1.217(4) . ? 
O2 C11 1.219(4) . ? 
O3 N5 1.249(4) . ? 
O4 N5 1.236(4) . ? 
O5 N5 1.194(4) . ? 
N1 C5 1.339(4) . ? 
N1 C1 1.352(4) . ? 
N2 C6 1.371(4) . ? 
N2 C5 1.399(4) . ? 
N2 H2N 0.86(4) . ? 
N3 C11 1.361(4) . ? 
N3 C12 1.394(4) . ? 
N3 H3N 0.81(4) . ? 
N4 C12 1.342(4) . ? 
N4 C16 1.352(4) . ? 
N4 Ag1 2.230(2) 1_444 ? 
C1 C2 1.352(5) . ? 
C1 H1 0.96(3) . ? 
C2 C3 1.377(5) . ? 
C2 H2 0.92(4) . ? 
C3 C4 1.373(5) . ? 
C3 H3 0.96(4) . ? 
C4 C5 1.389(4) . ? 
C4 H4 0.90(3) . ? 
C6 C7 1.502(5) . ? 
C7 C8 1.493(5) . ? 
C7 H7B 0.98(5) . ? 
C7 H7A 1.01(5) . ? 
C8 C9 1.513(5) . ? 
C8 H8B 0.92(4) . ? 
C8 H8A 1.03(4) . ? 
C9 C10 1.490(5) . ? 
C9 H9A 0.98(5) . ? 
C9 H9B 1.07(6) . ? 
C10 C11 1.500(5) . ? 
C10 H10A 0.96(4) . ? 
C10 H10B 1.00(5) . ? 
C12 C13 1.396(4) . ? 
C13 C14 1.374(5) . ? 
C13 H13 0.92(4) . ? 
C14 C15 1.376(5) . ? 
C14 H14 0.94(4) . ? 
C15 C16 1.360(5) . ? 
C15 H15 0.94(4) . ? 
C16 H16 0.93(3) . ? 
  
loop_ 
 _geom_angle_atom_site_label_1 
 _geom_angle_atom_site_label_2 
 _geom_angle_atom_site_label_3 
 _geom_angle 
 _geom_angle_site_symmetry_1 
 _geom_angle_site_symmetry_3 
 _geom_angle_publ_flag 
N1 Ag1 N4 175.52(9) . 1_666 ? 
C5 N1 C1 117.0(3) . . ? 
C5 N1 Ag1 128.74(19) . . ? 
C1 N1 Ag1 114.1(2) . . ? 
C6 N2 C5 126.6(3) . . ? 
C6 N2 H2N 117(2) . . ? 
C5 N2 H2N 116(2) . . ? 
C11 N3 C12 128.0(3) . . ? 
C11 N3 H3N 115(3) . . ? 
C12 N3 H3N 117(3) . . ? 
C12 N4 C16 117.5(3) . . ? 
C12 N4 Ag1 124.34(19) . 1_444 ? 
C16 N4 Ag1 115.9(2) . 1_444 ? 
O5 N5 O4 119.7(4) . . ? 
O5 N5 O3 123.0(4) . . ? 
O4 N5 O3 117.3(4) . . ? 
C2 C1 N1 123.7(3) . . ? 
C2 C1 H1 119(2) . . ? 
N1 C1 H1 117(2) . . ? 
C1 C2 C3 118.7(3) . . ? 
C1 C2 H2 119(2) . . ? 
C3 C2 H2 122(2) . . ? 
C4 C3 C2 119.5(3) . . ? 
C4 C3 H3 120(2) . . ? 
C2 C3 H3 120(2) . . ? 
C3 C4 C5 118.4(3) . . ? 
C3 C4 H4 120(2) . . ? 
C5 C4 H4 121(2) . . ? 
N1 C5 C4 122.6(3) . . ? 
N1 C5 N2 115.1(3) . . ? 
C4 C5 N2 122.2(3) . . ? 
O1 C6 N2 123.3(3) . . ? 
O1 C6 C7 123.3(3) . . ? 
N2 C6 C7 113.4(3) . . ? 
C8 C7 C6 117.0(3) . . ? 
C8 C7 H7B 111(3) . . ? 
C6 C7 H7B 109(3) . . ? 
C8 C7 H7A 103(3) . . ? 
C6 C7 H7A 112(3) . . ? 
H7B C7 H7A 105(4) . . ? 
C7 C8 C9 111.7(3) . . ? 
C7 C8 H8B 113(2) . . ? 
C9 C8 H8B 109(3) . . ? 
C7 C8 H8A 108(2) . . ? 
C9 C8 H8A 111(2) . . ? 
H8B C8 H8A 104(3) . . ? 
C10 C9 C8 115.4(3) . . ? 
C10 C9 H9A 111(3) . . ? 
C8 C9 H9A 111(3) . . ? 
C10 C9 H9B 103(3) . . ? 
C8 C9 H9B 105(3) . . ? 
H9A C9 H9B 110(4) . . ? 
C9 C10 C11 113.2(3) . . ? 
C9 C10 H10A 112(3) . . ? 
C11 C10 H10A 114(3) . . ? 
C9 C10 H10B 108(3) . . ? 
C11 C10 H10B 109(3) . . ? 
H10A C10 H10B 99(4) . . ? 
O2 C11 N3 122.3(3) . . ? 
O2 C11 C10 122.3(3) . . ? 
N3 C11 C10 115.4(3) . . ? 
N4 C12 N3 114.5(3) . . ? 
N4 C12 C13 122.1(3) . . ? 
N3 C12 C13 123.4(3) . . ? 
C14 C13 C12 118.5(3) . . ? 
C14 C13 H13 120(2) . . ? 
C12 C13 H13 122(2) . . ? 
C13 C14 C15 119.8(3) . . ? 
C13 C14 H14 123(2) . . ? 
C15 C14 H14 117(2) . . ? 
C16 C15 C14 118.6(3) . . ? 
C16 C15 H15 118(2) . . ? 
C14 C15 H15 123(2) . . ? 
N4 C16 C15 123.4(3) . . ? 
N4 C16 H16 115(2) . . ? 
C15 C16 H16 121(2) . . ? 
  
_diffrn_measured_fraction_theta_max    0.992 
_diffrn_reflns_theta_full              25.00 
_diffrn_measured_fraction_theta_full   0.992 
_refine_diff_density_max    0.511 
_refine_diff_density_min   -0.541 
_refine_diff_density_rms    0.058 
  

#===END

data_4 
  
_audit_creation_method            SHELXL-97 
_chemical_name_systematic 
; 
 ? 
; 
_chemical_name_common             ? 
_chemical_melting_point           ? 
_chemical_formula_moiety          ? 
_chemical_formula_sum 
 'C16 H18 Ag F6 N4 O2 P' 
_chemical_formula_weight          551.18 
  
loop_ 
 _atom_type_symbol 
 _atom_type_description 
 _atom_type_scat_dispersion_real 
 _atom_type_scat_dispersion_imag 
 _atom_type_scat_source 
 'C'  'C'   0.0033   0.0016 
 'International Tables Vol C Tables 4.2.6.8 and 6.1.1.4' 
 'H'  'H'   0.0000   0.0000 
 'International Tables Vol C Tables 4.2.6.8 and 6.1.1.4' 
 'N'  'N'   0.0061   0.0033 
 'International Tables Vol C Tables 4.2.6.8 and 6.1.1.4' 
 'O'  'O'   0.0106   0.0060 
 'International Tables Vol C Tables 4.2.6.8 and 6.1.1.4' 
 'F'  'F'   0.0171   0.0103 
 'International Tables Vol C Tables 4.2.6.8 and 6.1.1.4' 
 'P'  'P'   0.1023   0.0942 
 'International Tables Vol C Tables 4.2.6.8 and 6.1.1.4' 
 'Ag'  'Ag'  -0.8971   1.1015 
 'International Tables Vol C Tables 4.2.6.8 and 6.1.1.4' 
  
_symmetry_cell_setting            Triclinic 
_symmetry_space_group_name_H-M    P-1 
  
loop_ 
 _symmetry_equiv_pos_as_xyz 
 'x, y, z' 
 '-x, -y, -z' 
  
_cell_length_a                    4.9284(8) 
_cell_length_b                    10.5139(19) 
_cell_length_c                    11.6977(17) 
_cell_angle_alpha                 110.359(10) 
_cell_angle_beta                  92.989(11) 
_cell_angle_gamma                 93.981(13) 
_cell_volume                      565.01(16) 
_cell_formula_units_Z             1 
_cell_measurement_temperature     295(2) 
_cell_measurement_reflns_used     28 
_cell_measurement_theta_min       5.66 
_cell_measurement_theta_max       13.49 
  
_exptl_crystal_description        plate 
_exptl_crystal_colour             colorless 
_exptl_crystal_size_max           0.5 
_exptl_crystal_size_mid           0.3 
_exptl_crystal_size_min           0.2 
_exptl_crystal_density_meas       ? 
_exptl_crystal_density_diffrn     1.620 
_exptl_crystal_density_method     'not measured' 
_exptl_crystal_F_000              274 
_exptl_absorpt_coefficient_mu     1.030 
_exptl_absorpt_correction_type    empirical 
_exptl_absorpt_correction_T_min   0.8224 
_exptl_absorpt_correction_T_max   0.9873 
_exptl_absorpt_process_details    ? 
  
_exptl_special_details 
; 
 ? 
; 
  
_diffrn_ambient_temperature       295(2) 
_diffrn_radiation_wavelength      0.71073 
_diffrn_radiation_type            MoK\a 
_diffrn_radiation_source          'fine-focus sealed tube' 
_diffrn_radiation_monochromator   graphite 
_diffrn_measurement_device_type   'Bruker P4' 
_diffrn_measurement_method        '\w scans' 
_diffrn_detector_area_resol_mean  ? 
_diffrn_standards_number          3 
_diffrn_standards_interval_count  100
_diffrn_standards_interval_time   ? 
_diffrn_standards_decay_%         ? 
_diffrn_reflns_number             2655 
_diffrn_reflns_av_R_equivalents   0.0238 
_diffrn_reflns_av_sigmaI/netI     0.0354 
_diffrn_reflns_limit_h_min        -5 
_diffrn_reflns_limit_h_max        1 
_diffrn_reflns_limit_k_min        -11 
_diffrn_reflns_limit_k_max        11 
_diffrn_reflns_limit_l_min        -13 
_diffrn_reflns_limit_l_max        13 
_diffrn_reflns_theta_min          2.25 
_diffrn_reflns_theta_max          24.99 
_reflns_number_total              1940 
_reflns_number_gt                 1750 
_reflns_threshold_expression      >2sigma(I) 
  
_computing_data_collection        'Bruker XSCANS' 
_computing_cell_refinement        'Bruker XSCANS' 
_computing_data_reduction         'Bruker SHELXTL' 
_computing_structure_solution     'SHELXS-97 (Sheldrick, 1990)' 
_computing_structure_refinement   'SHELXL-97 (Sheldrick, 1997)' 
_computing_molecular_graphics     'Bruker SHELXTL' 
_computing_publication_material   'Bruker SHELXTL' 
  
_refine_special_details 
; 
 Refinement of F^2^ against ALL reflections.  The weighted R-factor wR and 
 goodness of fit S are based on F^2^, conventional R-factors R are based 
 on F, with F set to zero for negative F^2^. The threshold expression of 
 F^2^ > 2sigma(F^2^) is used only for calculating R-factors(gt) etc. and is 
 not relevant to the choice of reflections for refinement.  R-factors based 
 on F^2^ are statistically about twice as large as those based on F, and R- 
 factors based on ALL data will be even larger. 
; 
  
_refine_ls_structure_factor_coef  Fsqd 
_refine_ls_matrix_type            full 
_refine_ls_weighting_scheme       calc 
_refine_ls_weighting_details 
 'calc w=1/[\s^2^(Fo^2^)+(0.0000P)^2^+3.0828P] where P=(Fo^2^+2Fc^2^)/3' 
_atom_sites_solution_primary      direct 
_atom_sites_solution_secondary    difmap 
_atom_sites_solution_hydrogens    geom 
_refine_ls_hydrogen_treatment     mixed 
_refine_ls_extinction_method      none 
_refine_ls_extinction_coef        ? 
_refine_ls_number_reflns          1940 
_refine_ls_number_parameters      173 
_refine_ls_number_restraints      0 
_refine_ls_R_factor_all           0.0600 
_refine_ls_R_factor_gt            0.0543 
_refine_ls_wR_factor_ref          0.1238 
_refine_ls_wR_factor_gt           0.1209 
_refine_ls_goodness_of_fit_ref    1.032 
_refine_ls_restrained_S_all       1.032 
_refine_ls_shift/su_max           0.000 
_refine_ls_shift/su_mean          0.000 
  
loop_ 
 _atom_site_label 
 _atom_site_type_symbol 
 _atom_site_fract_x 
 _atom_site_fract_y 
 _atom_site_fract_z 
 _atom_site_U_iso_or_equiv 
 _atom_site_adp_type 
 _atom_site_occupancy 
 _atom_site_symmetry_multiplicity 
 _atom_site_calc_flag 
 _atom_site_refinement_flags 
 _atom_site_disorder_assembly 
 _atom_site_disorder_group 
Ag1 Ag 0.0000 0.5000 0.5000 0.0637(3) Uani 1 2 d S . . 
O1 O 0.7657(8) 0.3860(5) 0.2377(4) 0.0684(13) Uani 1 1 d . . . 
N1 N 0.2665(9) 0.3439(5) 0.4787(5) 0.0523(12) Uani 1 1 d . . . 
N2 N 0.3397(10) 0.3467(6) 0.2859(5) 0.0537(13) Uani 1 1 d . . . 
H2N H 0.166(14) 0.361(6) 0.271(6) 0.066(19) Uiso 1 1 d . . . 
C1 C 0.3086(14) 0.2946(7) 0.5694(6) 0.0652(18) Uani 1 1 d . . . 
H1A H 0.2068 0.3245 0.6369 0.078 Uiso 1 1 calc R . . 
C2 C 0.4907(15) 0.2040(8) 0.5673(7) 0.075(2) Uani 1 1 d . . . 
H2A H 0.5149 0.1727 0.6319 0.090 Uiso 1 1 calc R . . 
C3 C 0.6397(14) 0.1593(7) 0.4672(8) 0.075(2) Uani 1 1 d . . . 
H3A H 0.7693 0.0981 0.4640 0.090 Uiso 1 1 calc R . . 
C4 C 0.5961(13) 0.2056(7) 0.3710(7) 0.0619(17) Uani 1 1 d . . . 
H4A H 0.6931 0.1750 0.3019 0.074 Uiso 1 1 calc R . . 
C5 C 0.4066(11) 0.2977(6) 0.3799(5) 0.0480(14) Uani 1 1 d . . . 
C6 C 0.5230(11) 0.3859(7) 0.2185(5) 0.0504(14) Uani 1 1 d . . . 
C7 C 0.3935(13) 0.4343(10) 0.1242(7) 0.092(3) Uani 1 1 d . . . 
H7A H 0.2622 0.3616 0.0721 0.110 Uiso 1 1 calc R . . 
H7B H 0.2919 0.5103 0.1664 0.110 Uiso 1 1 calc R . . 
C8 C 0.5672(12) 0.4762(8) 0.0467(6) 0.0641(18) Uani 1 1 d . . . 
H8A H 0.6690 0.4003 0.0043 0.077 Uiso 1 1 calc R . . 
H8B H 0.6983 0.5493 0.0985 0.077 Uiso 1 1 calc R . . 
P1 P 0.0424(7) 0.8919(4) 0.1730(4) 0.0631(9) Uani 0.50 1 d P . . 
F1 F 0.0581(17) 0.9417(10) 0.3081(8) 0.088(3) Uani 0.50 1 d P . . 
F2 F 0.038(2) 0.7584(13) 0.1878(13) 0.138(5) Uani 0.50 1 d P . . 
F3 F 0.044(3) 1.0293(12) 0.1618(11) 0.141(5) Uani 0.50 1 d P . . 
F4 F 0.026(3) 0.8445(14) 0.0350(10) 0.147(5) Uani 0.50 1 d P . . 
F5 F 0.341(3) 0.9041(14) 0.1729(13) 0.155(5) Uani 0.50 1 d P . . 
F6 F -0.262(3) 0.8775(16) 0.1742(15) 0.177(6) Uani 0.50 1 d P . . 
  
loop_ 
 _atom_site_aniso_label 
 _atom_site_aniso_U_11 
 _atom_site_aniso_U_22 
 _atom_site_aniso_U_33 
 _atom_site_aniso_U_23 
 _atom_site_aniso_U_13 
 _atom_site_aniso_U_12 
Ag1 0.0546(4) 0.0822(6) 0.0702(5) 0.0441(4) 0.0121(3) 0.0161(4) 
O1 0.034(2) 0.120(4) 0.073(3) 0.059(3) 0.007(2) 0.015(2) 
N1 0.046(3) 0.064(3) 0.057(3) 0.034(3) -0.002(2) 0.001(2) 
N2 0.034(3) 0.083(4) 0.058(3) 0.042(3) 0.001(2) 0.007(2) 
C1 0.066(4) 0.078(5) 0.063(4) 0.043(4) -0.006(3) -0.004(4) 
C2 0.076(5) 0.082(5) 0.084(5) 0.056(4) -0.013(4) -0.004(4) 
C3 0.059(4) 0.062(4) 0.117(7) 0.053(5) -0.014(4) 0.004(3) 
C4 0.050(4) 0.062(4) 0.081(5) 0.035(4) 0.002(3) 0.007(3) 
C5 0.035(3) 0.058(4) 0.057(4) 0.031(3) -0.006(2) -0.004(3) 
C6 0.032(3) 0.075(4) 0.049(3) 0.029(3) 0.001(2) 0.006(3) 
C7 0.042(4) 0.176(9) 0.096(6) 0.100(6) -0.004(4) 0.001(4) 
C8 0.045(3) 0.100(5) 0.059(4) 0.044(4) 0.001(3) 0.008(3) 
P1 0.059(2) 0.061(2) 0.070(2) 0.0254(18) -0.0061(17) 0.0091(17) 
F1 0.076(5) 0.127(8) 0.079(6) 0.052(6) 0.007(4) 0.037(5) 
F2 0.125(9) 0.152(11) 0.170(12) 0.107(10) -0.025(8) -0.014(8) 
F3 0.187(12) 0.128(10) 0.133(10) 0.091(8) -0.039(9) -0.012(9) 
F4 0.206(14) 0.176(12) 0.093(8) 0.077(8) 0.021(8) 0.075(11) 
F5 0.129(11) 0.145(11) 0.158(12) 0.008(9) 0.041(9) 0.001(9) 
F6 0.132(11) 0.184(14) 0.183(14) 0.033(11) -0.036(10) 0.011(10) 
  
_geom_special_details 
; 
 All esds (except the esd in the dihedral angle between two l.s. planes) 
 are estimated using the full covariance matrix.  The cell esds are taken 
 into account individually in the estimation of esds in distances, angles 
 and torsion angles; correlations between esds in cell parameters are only 
 used when they are defined by crystal symmetry.  An approximate (isotropic) 
 treatment of cell esds is used for estimating esds involving l.s. planes. 
; 
  
loop_ 
 _geom_bond_atom_site_label_1 
 _geom_bond_atom_site_label_2 
 _geom_bond_distance 
 _geom_bond_site_symmetry_2 
 _geom_bond_publ_flag 
Ag1 N1 2.128(5) . ? 
Ag1 N1 2.128(5) 2_566 ? 
O1 C6 1.205(6) . ? 
N1 C5 1.337(7) . ? 
N1 C1 1.346(7) . ? 
N2 C6 1.363(7) . ? 
N2 C5 1.401(7) . ? 
N2 H2N 0.90(7) . ? 
C1 C2 1.348(10) . ? 
C1 H1A 0.9300 . ? 
C2 C3 1.373(11) . ? 
C2 H2A 0.9300 . ? 
C3 C4 1.386(9) . ? 
C3 H3A 0.9300 . ? 
C4 C5 1.373(8) . ? 
C4 H4A 0.9300 . ? 
C6 C7 1.498(8) . ? 
C7 C8 1.434(9) . ? 
C7 H7A 0.9700 . ? 
C7 H7B 0.9700 . ? 
C8 C8 1.495(11) 2_665 ? 
C8 H8A 0.9700 . ? 
C8 H8B 0.9700 . ? 
P1 F5 1.470(14) . ? 
P1 F2 1.471(12) . ? 
P1 F1 1.478(9) . ? 
P1 F3 1.495(11) . ? 
P1 F6 1.501(16) . ? 
P1 F4 1.510(12) . ? 
  
loop_ 
 _geom_angle_atom_site_label_1 
 _geom_angle_atom_site_label_2 
 _geom_angle_atom_site_label_3 
 _geom_angle 
 _geom_angle_site_symmetry_1 
 _geom_angle_site_symmetry_3 
 _geom_angle_publ_flag 
N1 Ag1 N1 180.000(2) . 2_566 ? 
C5 N1 C1 118.3(5) . . ? 
C5 N1 Ag1 121.9(4) . . ? 
C1 N1 Ag1 119.7(5) . . ? 
C6 N2 C5 125.1(5) . . ? 
C6 N2 H2N 115(4) . . ? 
C5 N2 H2N 119(4) . . ? 
N1 C1 C2 123.3(7) . . ? 
N1 C1 H1A 118.3 . . ? 
C2 C1 H1A 118.3 . . ? 
C1 C2 C3 118.3(6) . . ? 
C1 C2 H2A 120.8 . . ? 
C3 C2 H2A 120.8 . . ? 
C2 C3 C4 119.7(6) . . ? 
C2 C3 H3A 120.2 . . ? 
C4 C3 H3A 120.2 . . ? 
C5 C4 C3 118.5(7) . . ? 
C5 C4 H4A 120.7 . . ? 
C3 C4 H4A 120.7 . . ? 
N1 C5 C4 121.8(5) . . ? 
N1 C5 N2 115.2(5) . . ? 
C4 C5 N2 123.0(6) . . ? 
O1 C6 N2 122.3(5) . . ? 
O1 C6 C7 124.2(5) . . ? 
N2 C6 C7 113.5(5) . . ? 
C8 C7 C6 118.2(5) . . ? 
C8 C7 H7A 107.8 . . ? 
C6 C7 H7A 107.8 . . ? 
C8 C7 H7B 107.8 . . ? 
C6 C7 H7B 107.8 . . ? 
H7A C7 H7B 107.1 . . ? 
C7 C8 C8 117.2(7) . 2_665 ? 
C7 C8 H8A 108.0 . . ? 
C8 C8 H8A 108.0 2_665 . ? 
C7 C8 H8B 108.0 . . ? 
C8 C8 H8B 108.0 2_665 . ? 
H8A C8 H8B 107.3 . . ? 
F5 P1 F2 92.5(8) . . ? 
F5 P1 F1 91.8(7) . . ? 
F2 P1 F1 82.4(7) . . ? 
F5 P1 F3 88.2(8) . . ? 
F2 P1 F3 178.2(9) . . ? 
F1 P1 F3 95.9(7) . . ? 
F5 P1 F6 179.0(10) . . ? 
F2 P1 F6 86.5(8) . . ? 
F1 P1 F6 87.8(7) . . ? 
F3 P1 F6 92.7(9) . . ? 
F5 P1 F4 88.2(8) . . ? 
F2 P1 F4 99.0(8) . . ? 
F1 P1 F4 178.6(7) . . ? 
F3 P1 F4 82.7(7) . . ? 
F6 P1 F4 92.3(9) . . ? 
  
_diffrn_measured_fraction_theta_max    0.975 
_diffrn_reflns_theta_full              24.99 
_diffrn_measured_fraction_theta_full   0.975 
_refine_diff_density_max    0.754 
_refine_diff_density_min   -0.502 
_refine_diff_density_rms    0.096 

#===END

data_5 
  
_audit_creation_method            SHELXL-97 
_chemical_name_systematic 
; 
 ? 
; 
_chemical_name_common             ? 
_chemical_melting_point           ? 
_chemical_formula_moiety          ? 
_chemical_formula_sum 
 'C18 H22 Ag B F4 N5 O2.50' 
_chemical_formula_weight          543.09 
  
loop_ 
 _atom_type_symbol 
 _atom_type_description 
 _atom_type_scat_dispersion_real 
 _atom_type_scat_dispersion_imag 
 _atom_type_scat_source 
 'C'  'C'   0.0033   0.0016 
 'International Tables Vol C Tables 4.2.6.8 and 6.1.1.4' 
 'H'  'H'   0.0000   0.0000 
 'International Tables Vol C Tables 4.2.6.8 and 6.1.1.4' 
 'B'  'B'   0.0013   0.0007 
 'International Tables Vol C Tables 4.2.6.8 and 6.1.1.4' 
 'N'  'N'   0.0061   0.0033 
 'International Tables Vol C Tables 4.2.6.8 and 6.1.1.4' 
 'O'  'O'   0.0106   0.0060 
 'International Tables Vol C Tables 4.2.6.8 and 6.1.1.4' 
 'F'  'F'   0.0171   0.0103 
 'International Tables Vol C Tables 4.2.6.8 and 6.1.1.4' 
 'Ag'  'Ag'  -0.8971   1.1015 
 'International Tables Vol C Tables 4.2.6.8 and 6.1.1.4' 
  
_symmetry_cell_setting            Triclinic 
_symmetry_space_group_name_H-M    P1 
  
loop_ 
 _symmetry_equiv_pos_as_xyz 
 'x, y, z' 
  
_cell_length_a                    9.8724(18) 
_cell_length_b                    10.2111(11) 
_cell_length_c                    11.5477(12) 
_cell_angle_alpha                 111.007(8) 
_cell_angle_beta                  93.701(12) 
_cell_angle_gamma                 93.778(10) 
_cell_volume                      1079.5(3) 
_cell_formula_units_Z             2 
_cell_measurement_temperature     295(2) 
_cell_measurement_reflns_used     25 
_cell_measurement_theta_min       6.36 
_cell_measurement_theta_max       12.36 
  
_exptl_crystal_description        plate 
_exptl_crystal_colour             colorless 
_exptl_crystal_size_max           0.4 
_exptl_crystal_size_mid           0.3 
_exptl_crystal_size_min           0.2 
_exptl_crystal_density_meas       ? 
_exptl_crystal_density_diffrn     1.671 
_exptl_crystal_density_method     'not measured' 
_exptl_crystal_F_000              546 
_exptl_absorpt_coefficient_mu     0.995 
_exptl_absorpt_correction_type    empirical 
_exptl_absorpt_correction_T_min   0.3924 
_exptl_absorpt_correction_T_max   0.4129 
_exptl_absorpt_process_details    ? 
  
_exptl_special_details 
; 
 ? 
; 
  
_diffrn_ambient_temperature       295(2) 
_diffrn_radiation_wavelength      0.71073 
_diffrn_radiation_type            MoK\a 
_diffrn_radiation_source          'fine-focus sealed tube' 
_diffrn_radiation_monochromator   graphite 
_diffrn_measurement_device_type   'Bruker P4' 
_diffrn_measurement_method        '\w scans' 
_diffrn_detector_area_resol_mean  ? 
_diffrn_standards_number          3 
_diffrn_standards_interval_count  100 
_diffrn_standards_interval_time   ? 
_diffrn_standards_decay_%         ? 
_diffrn_reflns_number             4402 
_diffrn_reflns_av_R_equivalents   0.0000 
_diffrn_reflns_av_sigmaI/netI     0.0283 
_diffrn_reflns_limit_h_min        -11 
_diffrn_reflns_limit_h_max        1 
_diffrn_reflns_limit_k_min        -11 
_diffrn_reflns_limit_k_max        11 
_diffrn_reflns_limit_l_min        -13 
_diffrn_reflns_limit_l_max        13 
_diffrn_reflns_theta_min          1.90 
_diffrn_reflns_theta_max          25.00 
_reflns_number_total              4402 
_reflns_number_gt                 3301 
_reflns_threshold_expression      >2sigma(I) 
  
_computing_data_collection        'Bruker XSCANS' 
_computing_cell_refinement        'Bruker XSCANS' 
_computing_data_reduction         'Bruker SHELXTL' 
_computing_structure_solution     'SHELXS-97 (Sheldrick, 1990)' 
_computing_structure_refinement   'SHELXL-97 (Sheldrick, 1997)' 
_computing_molecular_graphics     'Bruker SHELXTL' 
_computing_publication_material   'Bruker SHELXTL' 
  
_refine_special_details 
; 
 Refinement of F^2^ against ALL reflections.  The weighted R-factor wR and 
 goodness of fit S are based on F^2^, conventional R-factors R are based 
 on F, with F set to zero for negative F^2^. The threshold expression of 
 F^2^ > 2sigma(F^2^) is used only for calculating R-factors(gt) etc. and is 
 not relevant to the choice of reflections for refinement.  R-factors based 
 on F^2^ are statistically about twice as large as those based on F, and R- 
 factors based on ALL data will be even larger. 
; 
  
_refine_ls_structure_factor_coef  Fsqd 
_refine_ls_matrix_type            full 
_refine_ls_weighting_scheme       calc 
_refine_ls_weighting_details 
 'calc w=1/[\s^2^(Fo^2^)+(0.0000P)^2^+3.6358P] where P=(Fo^2^+2Fc^2^)/3' 
_atom_sites_solution_primary      direct 
_atom_sites_solution_secondary    difmap 
_atom_sites_solution_hydrogens    geom 
_refine_ls_hydrogen_treatment     constr
_refine_ls_extinction_method      SHELXL 
_refine_ls_extinction_coef        0.0003(2) 
_refine_ls_extinction_expression 
 'Fc^*^=kFc[1+0.001xFc^2^\l^3^/sin(2\q)]^-1/4^' 
_refine_ls_abs_structure_details 
 'Flack H D (1983), Acta Cryst. A39, 876-881' 
_refine_ls_abs_structure_Flack    0.11(6) 
_refine_ls_number_reflns          4402 
_refine_ls_number_parameters      553 
_refine_ls_number_restraints      3 
_refine_ls_R_factor_all           0.0639 
_refine_ls_R_factor_gt            0.0421 
_refine_ls_wR_factor_ref          0.0846 
_refine_ls_wR_factor_gt           0.0750 
_refine_ls_goodness_of_fit_ref    1.031 
_refine_ls_restrained_S_all       1.030 
_refine_ls_shift/su_max           0.001 
_refine_ls_shift/su_mean          0.000 
  
loop_ 
 _atom_site_label 
 _atom_site_type_symbol 
 _atom_site_fract_x 
 _atom_site_fract_y 
 _atom_site_fract_z 
 _atom_site_U_iso_or_equiv 
 _atom_site_adp_type 
 _atom_site_occupancy 
 _atom_site_symmetry_multiplicity 
 _atom_site_calc_flag 
 _atom_site_refinement_flags 
 _atom_site_disorder_assembly 
 _atom_site_disorder_group 
Ag1 Ag -0.49675(8) 0.76258(8) 1.03391(7) 0.0535(5) Uani 1 1 d . . . 
Ag2 Ag 0.01545(8) 0.75291(8) 0.02628(7) 0.0527(5) Uani 1 1 d . . . 
O1 O -0.1150(14) 0.6202(17) 0.7557(14) 0.059(4) Uani 1 1 d . . . 
O2 O -0.3739(13) 0.8938(15) 0.3012(14) 0.050(4) Uani 1 1 d . . . 
O3 O 0.3919(13) 0.6371(17) -0.2307(14) 0.056(4) Uani 1 1 d . . . 
O4 O 0.1198(14) 0.8706(17) -0.7107(14) 0.056(4) Uani 1 1 d . . . 
N1 N -0.3560(14) 0.6046(15) 1.0152(15) 0.039(4) Uani 1 1 d . . . 
N2 N -0.3237(15) 0.5965(16) 0.8219(14) 0.040(4) Uani 1 1 d . . . 
H2N H -0.4199 0.6027 0.8038 0.048 Uiso 1 1 d R . . 
N3 N -0.1605(15) 0.9088(17) 0.2416(13) 0.039(4) Uani 1 1 d . . . 
H3N H -0.0711 0.9065 0.2641 0.047 Uiso 1 1 d R . . 
N4 N -0.1169(14) 0.9071(16) 0.0430(15) 0.043(4) Uani 1 1 d . . . 
N5 N 0.1522(17) 0.5969(17) 0.0081(14) 0.043(4) Uani 1 1 d . . . 
N6 N 0.1804(12) 0.5796(16) -0.1881(14) 0.041(4) Uani 1 1 d . . . 
H6N H 0.0834 0.5936 -0.1950 0.049 Uiso 1 1 d R . . 
N7 N 0.3334(15) 0.9237(17) -0.7460(14) 0.044(4) Uani 1 1 d . . . 
H7N H 0.4165 0.9298 -0.7092 0.053 Uiso 1 1 d R . . 
N8 N 0.3667(16) 0.9232(16) -0.9488(15) 0.042(4) Uani 1 1 d . . . 
C1 C -0.3420(17) 0.5610(17) 1.1110(14) 0.040(4) Uani 1 1 d . . . 
H1A H -0.3980 0.5919 1.1753 0.048 Uiso 1 1 calc R . . 
C2 C -0.245(2) 0.470(2) 1.116(2) 0.066(6) Uani 1 1 d . . . 
H2B H -0.2296 0.4412 1.1826 0.079 Uiso 1 1 calc R . . 
C3 C -0.171(2) 0.426(2) 1.007(2) 0.067(6) Uani 1 1 d . . . 
H3B H -0.1005 0.3709 1.0083 0.080 Uiso 1 1 calc R . . 
C4 C -0.1922(19) 0.455(2) 0.907(2) 0.055(5) Uani 1 1 d . . . 
H4A H -0.1493 0.4142 0.8348 0.066 Uiso 1 1 calc R . . 
C5 C -0.2807(19) 0.548(2) 0.9186(16) 0.046(5) Uani 1 1 d . . . 
C6 C -0.2390(15) 0.6284(17) 0.7462(15) 0.034(4) Uani 1 1 d . . . 
C7 C -0.3062(18) 0.6880(19) 0.6532(15) 0.044(4) Uani 1 1 d . . . 
H7B H -0.3523 0.7692 0.6992 0.053 Uiso 1 1 calc R . . 
H7C H -0.3746 0.6172 0.5973 0.053 Uiso 1 1 calc R . . 
C8 C -0.2013(19) 0.733(2) 0.5731(16) 0.050(5) Uani 1 1 d . . . 
H8B H -0.1325 0.8047 0.6281 0.060 Uiso 1 1 calc R . . 
H8C H -0.1559 0.6527 0.5252 0.060 Uiso 1 1 calc R . . 
C9 C -0.2751(16) 0.7913(19) 0.4863(16) 0.041(4) Uani 1 1 d . . . 
H9A H -0.3434 0.7191 0.4319 0.049 Uiso 1 1 calc R . . 
H9B H -0.3222 0.8702 0.5352 0.049 Uiso 1 1 calc R . . 
C10 C -0.1861(17) 0.838(2) 0.4099(17) 0.053(5) Uani 1 1 d . . . 
H10A H -0.1252 0.9179 0.4645 0.064 Uiso 1 1 calc R . . 
H10B H -0.1302 0.7628 0.3701 0.064 Uiso 1 1 calc R . . 
C11 C -0.2531(19) 0.878(2) 0.3140(15) 0.047(5) Uani 1 1 d . . . 
C12 C -0.1892(16) 0.9572(15) 0.1419(16) 0.028(4) Uani 1 1 d . . . 
C13 C -0.2919(19) 1.0504(17) 0.1436(17) 0.041(4) Uani 1 1 d . . . 
H13A H -0.3434 1.0797 0.2114 0.050 Uiso 1 1 calc R . . 
C14 C -0.317(2) 1.100(2) 0.0434(18) 0.053(5) Uani 1 1 d . . . 
H14A H -0.3817 1.1622 0.0441 0.064 Uiso 1 1 calc R . . 
C15 C -0.240(2) 1.048(2) -0.0517(16) 0.059(6) Uani 1 1 d . . . 
H15A H -0.2516 1.0763 -0.1197 0.071 Uiso 1 1 calc R . . 
C16 C -0.149(2) 0.960(2) -0.0517(19) 0.064(6) Uani 1 1 d . . . 
H16A H -0.1011 0.9289 -0.1216 0.077 Uiso 1 1 calc R . . 
C17 C 0.175(2) 0.553(2) 0.1048(17) 0.061(6) Uani 1 1 d . . . 
H17A H 0.1272 0.5860 0.1745 0.073 Uiso 1 1 calc R . . 
C18 C 0.275(2) 0.453(2) 0.099(2) 0.072(7) Uani 1 1 d . . . 
H18A H 0.2943 0.4214 0.1635 0.087 Uiso 1 1 calc R . . 
C19 C 0.338(2) 0.4096(19) -0.0081(19) 0.060(5) Uani 1 1 d . . . 
H19A H 0.4055 0.3490 -0.0108 0.072 Uiso 1 1 calc R . . 
C20 C 0.3167(15) 0.4427(17) -0.1100(18) 0.043(4) Uani 1 1 d . . . 
H20A H 0.3614 0.4068 -0.1817 0.051 Uiso 1 1 calc R . . 
C21 C 0.2194(16) 0.5371(18) -0.0941(17) 0.037(4) Uani 1 1 d . . . 
C22 C 0.2657(13) 0.6224(17) -0.2580(14) 0.027(3) Uani 1 1 d . . . 
C23 C 0.1967(17) 0.667(2) -0.3606(16) 0.070(6) Uani 1 1 d . . . 
H23A H 0.1244 0.7255 -0.3263 0.084 Uiso 1 1 calc R . . 
H23B H 0.1552 0.5838 -0.4282 0.084 Uiso 1 1 calc R . . 
C24 C 0.2996(18) 0.7530(18) -0.4155(14) 0.050(4) Uani 1 1 d . . . 
H24A H 0.3299 0.8441 -0.3517 0.060 Uiso 1 1 calc R . . 
H24B H 0.3791 0.7019 -0.4387 0.060 Uiso 1 1 calc R . . 
C25 C 0.2323(15) 0.774(2) -0.5282(16) 0.052(5) Uani 1 1 d . . . 
H25A H 0.2207 0.6837 -0.5967 0.063 Uiso 1 1 calc R . . 
H25B H 0.1420 0.8027 -0.5096 0.063 Uiso 1 1 calc R . . 
C26 C 0.2974(17) 0.869(2) -0.5676(17) 0.064(5) Uani 1 1 d . . . 
H26A H 0.3897 0.8439 -0.5815 0.077 Uiso 1 1 calc R . . 
H26B H 0.3035 0.9607 -0.5014 0.077 Uiso 1 1 calc R . . 
C27 C 0.233(2) 0.880(2) -0.6827(19) 0.058(5) Uani 1 1 d . . . 
C28 C 0.3034(18) 0.9680(18) -0.8500(17) 0.040(5) Uani 1 1 d . . . 
C29 C 0.207(2) 1.060(2) -0.8471(18) 0.056(5) Uani 1 1 d . . . 
H29A H 0.1591 1.0921 -0.7769 0.067 Uiso 1 1 calc R . . 
C30 C 0.1754(19) 1.110(2) -0.947(2) 0.063(6) Uani 1 1 d . . . 
H30A H 0.1119 1.1736 -0.9445 0.076 Uiso 1 1 calc R . . 
C31 C 0.249(2) 1.052(2) -1.0445(14) 0.055(5) Uani 1 1 d . . . 
H31A H 0.2342 1.0749 -1.1152 0.066 Uiso 1 1 calc R . . 
C32 C 0.338(2) 0.9679(18) -1.0419(18) 0.050(5) Uani 1 1 d . . . 
H32A H 0.3871 0.9349 -1.1111 0.060 Uiso 1 1 calc R . . 
N9 N -0.495(2) 0.1399(19) 0.7923(18) 0.116(6) Uani 1 1 d . . . 
C33 C -0.417(3) 0.218(2) 0.623(2) 0.164(13) Uani 1 1 d . . . 
H33A H -0.4575 0.1688 0.5397 0.247 Uiso 1 1 calc R . . 
H33B H -0.3194 0.2224 0.6242 0.247 Uiso 1 1 calc R . . 
H33C H -0.4443 0.3123 0.6532 0.247 Uiso 1 1 calc R . . 
C34 C -0.462(3) 0.144(2) 0.7043(17) 0.094(7) Uani 1 1 d . . . 
N10 N 0.001(2) 1.393(3) 0.295(2) 0.194(13) Uani 1 1 d . . . 
C35 C -0.083(2) 1.320(2) 0.4556(15) 0.105(7) Uani 1 1 d . . . 
H35A H -0.1703 1.2661 0.4306 0.157 Uiso 1 1 calc R . . 
H35B H -0.0917 1.4090 0.5193 0.157 Uiso 1 1 calc R . . 
H35C H -0.0211 1.2688 0.4873 0.157 Uiso 1 1 calc R . . 
C36 C -0.033(2) 1.340(2) 0.356(2) 0.093(7) Uani 1 1 d . . . 
B1 B 0.0048(8) 0.1713(7) 0.7286(7) 0.074(6) Uani 1 1 d G . . 
F1 F 0.0987(13) 0.0822(13) 0.6721(10) 0.221(8) Uani 1 1 d G . . 
F2 F 0.0187(13) 0.2903(9) 0.7002(8) 0.154(4) Uani 1 1 d G . . 
F3 F -0.1239(10) 0.1052(12) 0.6873(12) 0.195(7) Uani 1 1 d G . . 
F4 F 0.0256(12) 0.2074(11) 0.8551(7) 0.125(4) Uani 1 1 d G . . 
B2 B -0.4993(10) 1.3779(8) 0.3520(8) 0.068(5) Uani 1 1 d G . . 
F5 F -0.5969(17) 1.3663(15) 0.4279(14) 0.306(13) Uani 1 1 d G . . 
F6 F -0.3735(13) 1.3700(15) 0.4051(15) 0.237(9) Uani 1 1 d G . . 
F7 F -0.5250(13) 1.2706(10) 0.2384(11) 0.177(6) Uani 1 1 d G . . 
F8 F -0.5019(13) 1.5047(9) 0.3368(10) 0.164(5) Uani 1 1 d G . . 
O5 O -0.741(6) 1.251(7) 0.512(5) 0.437(17) Uani 1 1 d . . . 
  
loop_ 
 _atom_site_aniso_label 
 _atom_site_aniso_U_11 
 _atom_site_aniso_U_22 
 _atom_site_aniso_U_33 
 _atom_site_aniso_U_23 
 _atom_site_aniso_U_13 
 _atom_site_aniso_U_12 
Ag1 0.0493(11) 0.0655(9) 0.0564(8) 0.0326(8) 0.0115(8) 0.0145(8) 
Ag2 0.0483(11) 0.0658(9) 0.0557(8) 0.0325(7) 0.0152(7) 0.0173(8) 
O1 0.031(7) 0.105(12) 0.058(9) 0.050(9) 0.012(7) 0.014(8) 
O2 0.025(6) 0.074(9) 0.068(9) 0.045(8) 0.001(6) 0.010(6) 
O3 0.019(6) 0.100(11) 0.060(9) 0.043(8) -0.001(6) -0.001(7) 
O4 0.033(7) 0.100(11) 0.060(9) 0.058(8) 0.002(6) 0.012(7) 
N1 0.033(7) 0.042(7) 0.046(8) 0.022(7) -0.006(6) 0.017(5) 
N2 0.033(7) 0.046(7) 0.053(9) 0.030(7) 0.009(7) 0.007(6) 
N3 0.027(7) 0.063(9) 0.041(8) 0.037(7) -0.001(6) 0.004(6) 
N4 0.035(7) 0.053(9) 0.043(8) 0.023(7) 0.012(6) -0.015(6) 
N5 0.052(9) 0.054(9) 0.040(8) 0.040(7) 0.002(7) 0.002(8) 
N6 0.013(5) 0.064(8) 0.054(8) 0.030(7) 0.013(5) 0.001(5) 
N7 0.048(8) 0.059(8) 0.038(7) 0.034(6) -0.017(6) 0.013(6) 
N8 0.038(8) 0.046(8) 0.040(9) 0.013(7) 0.001(7) 0.005(7) 
C1 0.035(8) 0.050(9) 0.033(8) 0.014(7) -0.001(7) 0.000(7) 
C2 0.059(13) 0.059(12) 0.085(14) 0.041(11) -0.021(11) -0.024(10) 
C3 0.035(9) 0.044(9) 0.129(17) 0.048(11) -0.023(10) -0.005(7) 
C4 0.030(9) 0.066(11) 0.081(13) 0.044(10) -0.011(9) 0.004(9) 
C5 0.044(10) 0.062(10) 0.037(9) 0.026(8) -0.002(7) -0.010(8) 
C6 0.021(7) 0.036(7) 0.045(9) 0.017(7) -0.021(6) 0.003(6) 
C7 0.042(9) 0.067(10) 0.036(8) 0.033(8) 0.001(7) 0.020(7) 
C8 0.044(10) 0.078(12) 0.040(9) 0.034(8) 0.017(7) 0.004(9) 
C9 0.028(8) 0.054(9) 0.046(9) 0.027(7) -0.009(7) 0.009(7) 
C10 0.026(8) 0.088(13) 0.057(11) 0.037(10) 0.010(7) 0.006(8) 
C11 0.048(10) 0.062(10) 0.035(8) 0.017(7) 0.027(7) 0.004(8) 
C12 0.020(6) 0.019(6) 0.047(9) 0.017(6) -0.012(6) 0.006(5) 
C13 0.047(10) 0.034(8) 0.052(9) 0.022(7) 0.016(7) 0.016(7) 
C14 0.063(11) 0.058(10) 0.061(9) 0.047(8) -0.004(8) 0.014(8) 
C15 0.076(13) 0.075(12) 0.051(10) 0.050(10) 0.006(9) 0.029(10) 
C16 0.083(14) 0.071(13) 0.063(13) 0.056(11) 0.001(11) -0.001(11) 
C17 0.056(13) 0.085(14) 0.036(10) 0.021(9) -0.007(10) 0.001(11) 
C18 0.061(13) 0.067(12) 0.114(17) 0.072(13) -0.028(12) -0.006(10) 
C19 0.069(12) 0.050(9) 0.078(11) 0.041(9) 0.019(9) 0.022(8) 
C20 0.030(7) 0.045(8) 0.067(10) 0.035(7) 0.000(6) 0.020(6) 
C21 0.019(7) 0.049(9) 0.051(9) 0.027(8) 0.016(6) 0.005(6) 
C22 0.005(5) 0.054(8) 0.029(7) 0.026(6) -0.008(5) -0.003(5) 
C23 0.033(8) 0.153(15) 0.070(9) 0.100(11) -0.002(6) 0.001(8) 
C24 0.060(10) 0.064(9) 0.034(7) 0.024(7) 0.023(7) 0.013(8) 
C25 0.018(6) 0.102(12) 0.057(9) 0.059(9) -0.013(6) -0.011(7) 
C26 0.022(6) 0.097(11) 0.077(10) 0.038(8) -0.010(6) 0.002(7) 
C27 0.069(13) 0.063(11) 0.056(11) 0.036(9) 0.024(10) 0.003(9) 
C28 0.040(9) 0.036(8) 0.051(10) 0.030(7) -0.023(8) -0.004(7) 
C29 0.061(11) 0.063(10) 0.039(7) 0.014(7) 0.017(7) -0.012(9) 
C30 0.040(9) 0.067(11) 0.112(15) 0.077(12) -0.033(9) -0.009(8) 
C31 0.071(13) 0.070(11) 0.033(7) 0.030(7) 0.009(8) 0.003(10) 
C32 0.064(13) 0.044(9) 0.059(12) 0.037(9) 0.009(10) 0.002(9) 
N9 0.136(15) 0.153(13) 0.129(13) 0.119(11) 0.059(11) 0.064(12) 
C33 0.20(3) 0.083(13) 0.21(3) 0.072(16) -0.04(2) -0.010(17) 
C34 0.133(19) 0.099(14) 0.056(9) 0.042(9) -0.013(11) -0.002(13) 
N10 0.097(15) 0.42(4) 0.127(16) 0.17(2) 0.023(13) 0.06(2) 
C35 0.137(18) 0.135(16) 0.057(8) 0.049(9) 0.028(10) 0.014(14) 
C36 0.090(13) 0.078(11) 0.150(19) 0.079(12) 0.027(12) 0.047(10) 
B1 0.069(12) 0.059(10) 0.077(12) 0.007(9) 0.001(10) 0.003(9) 
F1 0.216(16) 0.260(17) 0.165(11) 0.014(11) 0.079(11) 0.170(15) 
F2 0.234(14) 0.135(8) 0.112(7) 0.070(6) 0.010(8) 0.008(9) 
F3 0.135(12) 0.171(12) 0.185(12) -0.035(10) -0.007(10) -0.042(10) 
F4 0.127(9) 0.183(11) 0.097(6) 0.076(7) 0.029(6) 0.071(8) 
B2 0.084(13) 0.067(10) 0.064(10) 0.034(8) 0.003(10) 0.023(10) 
F5 0.33(3) 0.27(2) 0.40(3) 0.18(2) 0.25(2) 0.103(19) 
F6 0.178(17) 0.264(19) 0.286(19) 0.132(16) -0.080(14) 0.058(14) 
F7 0.109(9) 0.122(8) 0.207(13) -0.047(9) -0.006(10) 0.008(8) 
F8 0.184(13) 0.147(9) 0.140(9) 0.045(7) -0.037(9) -0.033(9) 
O5 0.36(3) 0.69(5) 0.44(4) 0.37(4) 0.21(3) 0.17(3) 
  
_geom_special_details 
; 
 All esds (except the esd in the dihedral angle between two l.s. planes) 
 are estimated using the full covariance matrix.  The cell esds are taken 
 into account individually in the estimation of esds in distances, angles 
 and torsion angles; correlations between esds in cell parameters are only 
 used when they are defined by crystal symmetry.  An approximate (isotropic) 
 treatment of cell esds is used for estimating esds involving l.s. planes. 
; 
  
loop_ 
 _geom_bond_atom_site_label_1 
 _geom_bond_atom_site_label_2 
 _geom_bond_distance 
 _geom_bond_site_symmetry_2 
 _geom_bond_publ_flag 
Ag1 N8 2.154(15) 1_457 ? 
Ag1 N1 2.159(13) . ? 
Ag2 N4 2.076(16) . ? 
Ag2 N5 2.118(16) . ? 
O1 C6 1.23(2) . ? 
O2 C11 1.22(2) . ? 
O3 C22 1.250(18) . ? 
O4 C27 1.13(2) . ? 
N1 C1 1.34(2) . ? 
N1 C5 1.35(2) . ? 
N2 C6 1.35(2) . ? 
N2 C5 1.42(2) . ? 
N2 H2N 0.9704 . ? 
N3 C11 1.37(2) . ? 
N3 C12 1.426(19) . ? 
N3 H3N 0.9084 . ? 
N4 C12 1.34(2) . ? 
N4 C16 1.41(2) . ? 
N5 C21 1.36(2) . ? 
N5 C17 1.36(2) . ? 
N6 C21 1.35(2) . ? 
N6 C22 1.358(19) . ? 
N6 H6N 0.9798 . ? 
N7 C27 1.41(2) . ? 
N7 C28 1.447(19) . ? 
N7 H7N 0.8870 . ? 
N8 C28 1.29(2) . ? 
N8 C32 1.33(2) . ? 
N8 Ag1 2.154(15) 1_653 ? 
C1 C2 1.38(3) . ? 
C1 H1A 0.9300 . ? 
C2 C3 1.44(3) . ? 
C2 H2B 0.9300 . ? 
C3 C4 1.30(3) . ? 
C3 H3B 0.9300 . ? 
C4 C5 1.31(3) . ? 
C4 H4A 0.9300 . ? 
C6 C7 1.546(17) . ? 
C7 C8 1.58(2) . ? 
C7 H7B 0.9700 . ? 
C7 H7C 0.9700 . ? 
C8 C9 1.508(10) . ? 
C8 H8B 0.9700 . ? 
C8 H8C 0.9700 . ? 
C9 C10 1.46(2) . ? 
C9 H9A 0.9700 . ? 
C9 H9B 0.9700 . ? 
C10 C11 1.45(2) . ? 
C10 H10A 0.9700 . ? 
C10 H10B 0.9700 . ? 
C12 C13 1.43(2) . ? 
C13 C14 1.43(2) . ? 
C13 H13A 0.9300 . ? 
C14 C15 1.34(3) . ? 
C14 H14A 0.9300 . ? 
C15 C16 1.31(3) . ? 
C15 H15A 0.9300 . ? 
C16 H16A 0.9300 . ? 
C17 C18 1.45(3) . ? 
C17 H17A 0.9300 . ? 
C18 C19 1.36(3) . ? 
C18 H18A 0.9300 . ? 
C19 C20 1.35(2) . ? 
C19 H19A 0.9300 . ? 
C20 C21 1.38(2) . ? 
C20 H20A 0.9300 . ? 
C22 C23 1.552(16) . ? 
C23 C24 1.60(2) . ? 
C23 H23A 0.9700 . ? 
C23 H23B 0.9700 . ? 
C24 C25 1.513(10) . ? 
C24 H24A 0.9700 . ? 
C24 H24B 0.9700 . ? 
C25 C26 1.35(2) . ? 
C25 H25A 0.9700 . ? 
C25 H25B 0.9700 . ? 
C26 C27 1.48(2) . ? 
C26 H26A 0.9700 . ? 
C26 H26B 0.9700 . ? 
C28 C29 1.38(3) . ? 
C29 C30 1.44(3) . ? 
C29 H29A 0.9300 . ? 
C30 C31 1.35(3) . ? 
C30 H30A 0.9300 . ? 
C31 C32 1.28(3) . ? 
C31 H31A 0.9300 . ? 
C32 H32A 0.9300 . ? 
N9 C34 1.10(2) . ? 
C33 C34 1.47(3) . ? 
C33 H33A 0.9600 . ? 
C33 H33B 0.9600 . ? 
C33 H33C 0.9600 . ? 
N10 C36 1.08(3) . ? 
C35 C36 1.36(3) . ? 
C35 H35A 0.9600 . ? 
C35 H35B 0.9600 . ? 
C35 H35C 0.9600 . ? 
B1 F2 1.3696 . ? 
B1 F1 1.3696 . ? 
B1 F4 1.3697 . ? 
B1 F3 1.3697 . ? 
B2 F8 1.3696 . ? 
B2 F5 1.3697 . ? 
B2 F6 1.3697 . ? 
B2 F7 1.3697 . ? 
  
loop_ 
 _geom_angle_atom_site_label_1 
 _geom_angle_atom_site_label_2 
 _geom_angle_atom_site_label_3 
 _geom_angle 
 _geom_angle_site_symmetry_1 
 _geom_angle_site_symmetry_3 
 _geom_angle_publ_flag 
N8 Ag1 N1 178.6(7) 1_457 . ? 
N4 Ag2 N5 179.3(7) . . ? 
C1 N1 C5 117.8(14) . . ? 
C1 N1 Ag1 115.3(12) . . ? 
C5 N1 Ag1 126.9(12) . . ? 
C6 N2 C5 124.2(14) . . ? 
C6 N2 H2N 115.8 . . ? 
C5 N2 H2N 119.9 . . ? 
C11 N3 C12 126.5(14) . . ? 
C11 N3 H3N 116.8 . . ? 
C12 N3 H3N 116.4 . . ? 
C12 N4 C16 113.5(16) . . ? 
C12 N4 Ag2 122.5(11) . . ? 
C16 N4 Ag2 123.7(13) . . ? 
C21 N5 C17 117.0(17) . . ? 
C21 N5 Ag2 124.6(11) . . ? 
C17 N5 Ag2 118.4(14) . . ? 
C21 N6 C22 125.5(12) . . ? 
C21 N6 H6N 114.4 . . ? 
C22 N6 H6N 119.4 . . ? 
C27 N7 C28 124.0(15) . . ? 
C27 N7 H7N 111.6 . . ? 
C28 N7 H7N 124.1 . . ? 
C28 N8 C32 119.6(16) . . ? 
C28 N8 Ag1 118.7(12) . 1_653 ? 
C32 N8 Ag1 121.4(14) . 1_653 ? 
N1 C1 C2 120.8(16) . . ? 
N1 C1 H1A 119.6 . . ? 
C2 C1 H1A 119.6 . . ? 
C1 C2 C3 113.2(17) . . ? 
C1 C2 H2B 123.4 . . ? 
C3 C2 H2B 123.4 . . ? 
C4 C3 C2 127(2) . . ? 
C4 C3 H3B 116.4 . . ? 
C2 C3 H3B 116.4 . . ? 
C3 C4 C5 112(2) . . ? 
C3 C4 H4A 123.8 . . ? 
C5 C4 H4A 123.8 . . ? 
C4 C5 N1 127.8(17) . . ? 
C4 C5 N2 123.8(19) . . ? 
N1 C5 N2 108.1(17) . . ? 
O1 C6 N2 122.7(14) . . ? 
O1 C6 C7 121.7(17) . . ? 
N2 C6 C7 115.5(13) . . ? 
C6 C7 C8 113.6(14) . . ? 
C6 C7 H7B 108.9 . . ? 
C8 C7 H7B 108.9 . . ? 
C6 C7 H7C 108.9 . . ? 
C8 C7 H7C 108.9 . . ? 
H7B C7 H7C 107.7 . . ? 
C9 C8 C7 109.9(10) . . ? 
C9 C8 H8B 109.7 . . ? 
C7 C8 H8B 109.7 . . ? 
C9 C8 H8C 109.7 . . ? 
C7 C8 H8C 109.7 . . ? 
H8B C8 H8C 108.2 . . ? 
C10 C9 C8 113.9(10) . . ? 
C10 C9 H9A 108.8 . . ? 
C8 C9 H9A 108.8 . . ? 
C10 C9 H9B 108.8 . . ? 
C8 C9 H9B 108.8 . . ? 
H9A C9 H9B 107.7 . . ? 
C11 C10 C9 116.2(15) . . ? 
C11 C10 H10A 108.2 . . ? 
C9 C10 H10A 108.2 . . ? 
C11 C10 H10B 108.2 . . ? 
C9 C10 H10B 108.2 . . ? 
H10A C10 H10B 107.4 . . ? 
O2 C11 N3 122.4(16) . . ? 
O2 C11 C10 126.4(16) . . ? 
N3 C11 C10 111.0(15) . . ? 
N4 C12 N3 116.3(14) . . ? 
N4 C12 C13 121.1(15) . . ? 
N3 C12 C13 122.6(16) . . ? 
C14 C13 C12 121.5(17) . . ? 
C14 C13 H13A 119.2 . . ? 
C12 C13 H13A 119.2 . . ? 
C15 C14 C13 114.7(18) . . ? 
C15 C14 H14A 122.6 . . ? 
C13 C14 H14A 122.6 . . ? 
C16 C15 C14 122.1(15) . . ? 
C16 C15 H15A 119.0 . . ? 
C14 C15 H15A 119.0 . . ? 
C15 C16 N4 127.0(19) . . ? 
C15 C16 H16A 116.5 . . ? 
N4 C16 H16A 116.5 . . ? 
N5 C17 C18 119.8(19) . . ? 
N5 C17 H17A 120.1 . . ? 
C18 C17 H17A 120.1 . . ? 
C19 C18 C17 115.4(16) . . ? 
C19 C18 H18A 122.3 . . ? 
C17 C18 H18A 122.3 . . ? 
C20 C19 C18 128.4(17) . . ? 
C20 C19 H19A 115.8 . . ? 
C18 C19 H19A 115.8 . . ? 
C19 C20 C21 111.0(17) . . ? 
C19 C20 H20A 124.5 . . ? 
C21 C20 H20A 124.5 . . ? 
N6 C21 N5 112.1(15) . . ? 
N6 C21 C20 119.8(16) . . ? 
N5 C21 C20 128.1(16) . . ? 
O3 C22 N6 120.3(13) . . ? 
O3 C22 C23 123.3(15) . . ? 
N6 C22 C23 116.0(12) . . ? 
C22 C23 C24 113.6(13) . . ? 
C22 C23 H23A 108.8 . . ? 
C24 C23 H23A 108.8 . . ? 
C22 C23 H23B 108.8 . . ? 
C24 C23 H23B 108.8 . . ? 
H23A C23 H23B 107.7 . . ? 
C25 C24 C23 111.2(11) . . ? 
C25 C24 H24A 109.4 . . ? 
C23 C24 H24A 109.4 . . ? 
C25 C24 H24B 109.4 . . ? 
C23 C24 H24B 109.4 . . ? 
H24A C24 H24B 108.0 . . ? 
C26 C25 C24 116.9(11) . . ? 
C26 C25 H25A 108.1 . . ? 
C24 C25 H25A 108.1 . . ? 
C26 C25 H25B 108.1 . . ? 
C24 C25 H25B 108.1 . . ? 
H25A C25 H25B 107.3 . . ? 
C25 C26 C27 115.4(16) . . ? 
C25 C26 H26A 108.4 . . ? 
C27 C26 H26A 108.4 . . ? 
C25 C26 H26B 108.4 . . ? 
C27 C26 H26B 108.4 . . ? 
H26A C26 H26B 107.5 . . ? 
O4 C27 N7 123.5(19) . . ? 
O4 C27 C26 126(2) . . ? 
N7 C27 C26 109.8(17) . . ? 
N8 C28 C29 117.3(15) . . ? 
N8 C28 N7 121.2(17) . . ? 
C29 C28 N7 121.5(18) . . ? 
C28 C29 C30 123.5(19) . . ? 
C28 C29 H29A 118.2 . . ? 
C30 C29 H29A 118.2 . . ? 
C31 C30 C29 112.3(18) . . ? 
C31 C30 H30A 123.9 . . ? 
C29 C30 H30A 123.9 . . ? 
C32 C31 C30 121.6(15) . . ? 
C32 C31 H31A 119.2 . . ? 
C30 C31 H31A 119.2 . . ? 
C31 C32 N8 125.7(18) . . ? 
C31 C32 H32A 117.2 . . ? 
N8 C32 H32A 117.2 . . ? 
C34 C33 H33A 109.5 . . ? 
C34 C33 H33B 109.5 . . ? 
H33A C33 H33B 109.5 . . ? 
C34 C33 H33C 109.5 . . ? 
H33A C33 H33C 109.5 . . ? 
H33B C33 H33C 109.5 . . ? 
N9 C34 C33 153(2) . . ? 
C36 C35 H35A 109.5 . . ? 
C36 C35 H35B 109.5 . . ? 
H35A C35 H35B 109.5 . . ? 
C36 C35 H35C 109.5 . . ? 
H35A C35 H35C 109.5 . . ? 
H35B C35 H35C 109.5 . . ? 
N10 C36 C35 161(3) . . ? 
F2 B1 F1 109.5 . . ? 
F2 B1 F4 109.4 . . ? 
F1 B1 F4 109.5 . . ? 
F2 B1 F3 109.5 . . ? 
F1 B1 F3 109.5 . . ? 
F4 B1 F3 109.4 . . ? 
F8 B2 F5 109.4 . . ? 
F8 B2 F6 109.5 . . ? 
F5 B2 F6 109.5 . . ? 
F8 B2 F7 109.5 . . ? 
F5 B2 F7 109.5 . . ? 
F6 B2 F7 109.5 . . ? 
  
_diffrn_measured_fraction_theta_max    0.974 
_diffrn_reflns_theta_full              25.00 
_diffrn_measured_fraction_theta_full   0.974 
_refine_diff_density_max    0.698 
_refine_diff_density_min   -0.399 
_refine_diff_density_rms    0.072 

#===END

data_6
  
_audit_creation_method            SHELXL-97 
_chemical_name_systematic 
; 
 ? 
; 
_chemical_name_common             ? 
_chemical_melting_point           ? 
_chemical_formula_moiety          ? 
_chemical_formula_sum 
 'C18 H21 Ag Cl N5 O6' 
_chemical_formula_weight          546.72 
  
loop_ 
 _atom_type_symbol 
 _atom_type_description 
 _atom_type_scat_dispersion_real 
 _atom_type_scat_dispersion_imag 
 _atom_type_scat_source 
 'C'  'C'   0.0033   0.0016 
 'International Tables Vol C Tables 4.2.6.8 and 6.1.1.4' 
 'H'  'H'   0.0000   0.0000 
 'International Tables Vol C Tables 4.2.6.8 and 6.1.1.4' 
 'N'  'N'   0.0061   0.0033 
 'International Tables Vol C Tables 4.2.6.8 and 6.1.1.4' 
 'O'  'O'   0.0106   0.0060 
 'International Tables Vol C Tables 4.2.6.8 and 6.1.1.4' 
 'Cl'  'Cl'   0.1484   0.1585 
 'International Tables Vol C Tables 4.2.6.8 and 6.1.1.4' 
 'Ag'  'Ag'  -0.8971   1.1015 
 'International Tables Vol C Tables 4.2.6.8 and 6.1.1.4' 
  
_symmetry_cell_setting            Triclinic 
_symmetry_space_group_name_H-M    P1 
  
loop_ 
 _symmetry_equiv_pos_as_xyz 
 'x, y, z' 
  
_cell_length_a                    9.8733(19) 
_cell_length_b                    10.3078(18) 
_cell_length_c                    11.5645(14) 
_cell_angle_alpha                 111.169(10) 
_cell_angle_beta                  93.351(13) 
_cell_angle_gamma                 93.971(13) 
_cell_volume                      1090.5(3) 
_cell_formula_units_Z             2 
_cell_measurement_temperature     295(2) 
_cell_measurement_reflns_used     962 
_cell_measurement_theta_min       2.82 
_cell_measurement_theta_max       25.07 
  
_exptl_crystal_description        plate 
_exptl_crystal_colour             yellow 
_exptl_crystal_size_max           0.4 
_exptl_crystal_size_mid           0.2 
_exptl_crystal_size_min           0.1 
_exptl_crystal_density_meas       0 
_exptl_crystal_density_diffrn     1.665 
_exptl_crystal_density_method     'not measured' 
_exptl_crystal_F_000              552 
_exptl_absorpt_coefficient_mu     1.091 
_exptl_absorpt_correction_type    empirical 
_exptl_absorpt_correction_T_min   0.7081 
_exptl_absorpt_correction_T_max   0.8893 
_exptl_absorpt_process_details    ? 
  
_exptl_special_details 
; 
 ? 
; 
  
_diffrn_ambient_temperature       295(2) 
_diffrn_radiation_wavelength      0.71073 
_diffrn_radiation_type            MoK\a 
_diffrn_radiation_source          'fine-focus sealed tube' 
_diffrn_radiation_monochromator   graphite 
_diffrn_measurement_device_type   'CCD area detector' 
_diffrn_measurement_method        'phi and omega scans' 
_diffrn_detector_area_resol_mean  ? 
_diffrn_standards_number          ? 
_diffrn_standards_interval_count  ? 
_diffrn_standards_interval_time   ? 
_diffrn_standards_decay_%         ? 
_diffrn_reflns_number             10548 
_diffrn_reflns_av_R_equivalents   0.0212 
_diffrn_reflns_av_sigmaI/netI     0.0220 
_diffrn_reflns_limit_h_min        -11 
_diffrn_reflns_limit_h_max        11 
_diffrn_reflns_limit_k_min        -12 
_diffrn_reflns_limit_k_max        12 
_diffrn_reflns_limit_l_min        -13 
_diffrn_reflns_limit_l_max        13 
_diffrn_reflns_theta_min          2.13 
_diffrn_reflns_theta_max          25.17 
_reflns_number_total              7588 
_reflns_number_gt                 6279 
_reflns_threshold_expression      >2sigma(I) 
  
_computing_data_collection        'Bruker SMART' 
_computing_cell_refinement        'Bruker SMART' 
_computing_data_reduction         'Bruker SAINT' 
_computing_structure_solution     'SHELXS-97 (Sheldrick, 1990)' 
_computing_structure_refinement   'SHELXL-97 (Sheldrick, 1997)' 
_computing_molecular_graphics     'Bruker SHELXTL' 
_computing_publication_material   'Bruker SHELXTL' 
  
_refine_special_details 
; 
 Refinement of F^2^ against ALL reflections.  The weighted R-factor wR and 
 goodness of fit S are based on F^2^, conventional R-factors R are based 
 on F, with F set to zero for negative F^2^. The threshold expression of 
 F^2^ > 2sigma(F^2^) is used only for calculating R-factors(gt) etc. and is 
 not relevant to the choice of reflections for refinement.  R-factors based 
 on F^2^ are statistically about twice as large as those based on F, and R- 
 factors based on ALL data will be even larger. 
; 
  
_refine_ls_structure_factor_coef  Fsqd 
_refine_ls_matrix_type            full 
_refine_ls_weighting_scheme       calc 
_refine_ls_weighting_details 
 'calc w=1/[\s^2^(Fo^2^)+(0.0681P)^2^+0.7104P] where P=(Fo^2^+2Fc^2^)/3' 
_atom_sites_solution_primary      direct 
_atom_sites_solution_secondary    difmap 
_atom_sites_solution_hydrogens    geom 
_refine_ls_hydrogen_treatment     constr 
_refine_ls_extinction_method      none 
_refine_ls_extinction_coef        ? 
_refine_ls_abs_structure_details  ?
_refine_ls_number_reflns          7588 
_refine_ls_number_parameters      559 
_refine_ls_number_restraints      4 
_refine_ls_R_factor_all           0.0473 
_refine_ls_R_factor_gt            0.0370 
_refine_ls_wR_factor_ref          0.1158 
_refine_ls_wR_factor_gt           0.1057 
_refine_ls_goodness_of_fit_ref    1.049 
_refine_ls_restrained_S_all       1.048 
_refine_ls_shift/su_max           0.001 
_refine_ls_shift/su_mean          0.000 
  
loop_ 
 _atom_site_label 
 _atom_site_type_symbol 
 _atom_site_fract_x 
 _atom_site_fract_y 
 _atom_site_fract_z 
 _atom_site_U_iso_or_equiv 
 _atom_site_adp_type 
 _atom_site_occupancy 
 _atom_site_symmetry_multiplicity 
 _atom_site_calc_flag 
 _atom_site_refinement_flags 
 _atom_site_disorder_assembly 
 _atom_site_disorder_group 
Ag1 Ag 0.50044(3) 0.58313(3) 0.48791(3) 0.05541(17) Uani 1 1 d . . . 
Ag2 Ag 1.01250(3) 0.57285(3) -0.52050(3) 0.05320(16) Uani 1 1 d . . . 
O1 O 0.8867(5) 0.4452(6) 0.2124(5) 0.0626(15) Uani 1 1 d . . . 
O2 O 0.6287(4) 0.7118(5) -0.2435(4) 0.0507(13) Uani 1 1 d . . . 
O3 O 1.3926(4) 0.4653(6) -0.7736(5) 0.0595(15) Uani 1 1 d . . . 
O4 O 1.1219(5) 0.6919(6) -1.2550(4) 0.0600(16) Uani 1 1 d . . . 
N1 N 0.6387(5) 0.4236(5) 0.4699(5) 0.0412(14) Uani 1 1 d . . . 
N2 N 0.6771(5) 0.4203(5) 0.2729(5) 0.0444(14) Uani 1 1 d . . . 
H2 H 0.5924 0.4280 0.2574 0.053 Uiso 1 1 calc R . . 
N3 N 0.8410(5) 0.7267(6) -0.3065(4) 0.0415(14) Uani 1 1 d . . . 
H3A H 0.9248 0.7137 -0.2939 0.050 Uiso 1 1 calc R . . 
N4 N 0.8800(6) 0.7269(6) -0.5006(5) 0.0444(15) Uani 1 1 d . . . 
N5 N 1.1516(5) 0.4163(6) -0.5373(5) 0.0457(15) Uani 1 1 d . . . 
N6 N 1.1846(5) 0.4078(6) -0.7370(5) 0.0436(14) Uani 1 1 d . . . 
H6A H 1.0993 0.4091 -0.7557 0.052 Uiso 1 1 calc R . . 
N7 N 1.3395(5) 0.7434(6) -1.2949(5) 0.0430(14) Uani 1 1 d . . . 
H7N H 1.4245 0.7393 -1.2771 0.052 Uiso 1 1 calc R . . 
N8 N 1.3698(6) 0.7411(6) -1.4906(5) 0.0423(15) Uani 1 1 d . . . 
C1 C 0.6561(7) 0.3797(6) 0.5587(6) 0.0429(16) Uani 1 1 d . . . 
H1A H 0.6024 0.4081 0.6252 0.052 Uiso 1 1 calc R . . 
C2 C 0.7611(9) 0.2841(8) 0.5569(8) 0.073(2) Uani 1 1 d . . . 
H2B H 0.7833 0.2582 0.6243 0.087 Uiso 1 1 calc R . . 
C3 C 0.8204(8) 0.2384(7) 0.4538(8) 0.063(2) Uani 1 1 d . . . 
H3B H 0.8806 0.1704 0.4434 0.075 Uiso 1 1 calc R . . 
C4 C 0.7975(8) 0.2855(8) 0.3658(8) 0.065(2) Uani 1 1 d . . . 
H4A H 0.8496 0.2556 0.2983 0.078 Uiso 1 1 calc R . . 
C5 C 0.7059(5) 0.3730(7) 0.3636(6) 0.0418(17) Uani 1 1 d . . . 
C6 C 0.7615(6) 0.4563(6) 0.2045(5) 0.0406(16) Uani 1 1 d . . . 
C7 C 0.6955(7) 0.5172(7) 0.1165(6) 0.0490(17) Uani 1 1 d . . . 
H7A H 0.6613 0.6045 0.1654 0.059 Uiso 1 1 calc R . . 
H7B H 0.6180 0.4535 0.0687 0.059 Uiso 1 1 calc R . . 
C8 C 0.7943(6) 0.5456(7) 0.0224(5) 0.0423(16) Uani 1 1 d . . . 
H8B H 0.8722 0.6093 0.0693 0.051 Uiso 1 1 calc R . . 
H8C H 0.8277 0.4585 -0.0281 0.051 Uiso 1 1 calc R . . 
C9 C 0.7216(7) 0.6082(8) -0.0626(7) 0.0525(19) Uani 1 1 d . . . 
H9A H 0.6511 0.5396 -0.1173 0.063 Uiso 1 1 calc R . . 
H9B H 0.6781 0.6886 -0.0123 0.063 Uiso 1 1 calc R . . 
C10 C 0.8137(6) 0.6496(8) -0.1354(6) 0.0497(19) Uani 1 1 d . . . 
H10A H 0.8629 0.5706 -0.1792 0.060 Uiso 1 1 calc R . . 
H10B H 0.8798 0.7230 -0.0800 0.060 Uiso 1 1 calc R . . 
C11 C 0.7476(6) 0.7011(7) -0.2286(6) 0.0427(17) Uani 1 1 d . . . 
C12 C 0.8042(7) 0.7746(6) -0.4087(6) 0.0378(16) Uani 1 1 d . . . 
C13 C 0.7047(6) 0.8721(6) -0.3941(7) 0.0433(16) Uani 1 1 d . . . 
H13A H 0.6600 0.9071 -0.3222 0.052 Uiso 1 1 calc R . . 
C14 C 0.6790(8) 0.9126(8) -0.5021(8) 0.0577(19) Uani 1 1 d . . . 
H14A H 0.6087 0.9664 -0.5074 0.069 Uiso 1 1 calc R . . 
C15 C 0.7681(8) 0.8646(8) -0.5985(6) 0.0534(18) Uani 1 1 d . . . 
H15A H 0.7628 0.8979 -0.6632 0.064 Uiso 1 1 calc R . . 
C16 C 0.8537(10) 0.7788(10) -0.5997(8) 0.071(3) Uani 1 1 d . . . 
H16A H 0.9032 0.7469 -0.6688 0.085 Uiso 1 1 calc R . . 
C17 C 1.1688(6) 0.3727(6) -0.4464(5) 0.0406(14) Uani 1 1 d . . . 
H17A H 1.1160 0.4016 -0.3793 0.049 Uiso 1 1 calc R . . 
C18 C 1.2718(9) 0.2781(8) -0.4505(9) 0.071(2) Uani 1 1 d . . . 
H18A H 1.2960 0.2536 -0.3827 0.085 Uiso 1 1 calc R . . 
C19 C 1.3294(8) 0.2284(8) -0.5559(9) 0.064(2) Uani 1 1 d . . . 
H19A H 1.3885 0.1596 -0.5654 0.077 Uiso 1 1 calc R . . 
C20 C 1.3069(8) 0.2713(8) -0.6452(7) 0.060(2) Uani 1 1 d . . . 
H20A H 1.3573 0.2389 -0.7138 0.072 Uiso 1 1 calc R . . 
C21 C 1.2144(6) 0.3607(7) -0.6454(6) 0.0408(17) Uani 1 1 d . . . 
C22 C 1.2671(6) 0.4515(7) -0.8012(6) 0.0472(18) Uani 1 1 d . . . 
C23 C 1.1957(8) 0.4843(10) -0.9076(8) 0.096(3) Uani 1 1 d . . . 
H23A H 1.1215 0.5402 -0.8758 0.115 Uiso 1 1 calc R . . 
H23B H 1.1565 0.3972 -0.9715 0.115 Uiso 1 1 calc R . . 
C24 C 1.2899(7) 0.5626(8) -0.9674(6) 0.0524(18) Uani 1 1 d . . . 
H24A H 1.3218 0.6537 -0.9054 0.063 Uiso 1 1 calc R . . 
H24B H 1.3689 0.5114 -0.9913 0.063 Uiso 1 1 calc R . . 
C25 C 1.2251(8) 0.5826(9) -1.0789(6) 0.0517(19) Uani 1 1 d . . . 
H25A H 1.2158 0.4939 -1.1487 0.062 Uiso 1 1 calc R . . 
H25B H 1.1344 0.6108 -1.0622 0.062 Uiso 1 1 calc R . . 
C26 C 1.3002(7) 0.6839(8) -1.1128(6) 0.0564(18) Uani 1 1 d . . . 
H26A H 1.3914 0.6560 -1.1271 0.068 Uiso 1 1 calc R . . 
H26B H 1.3085 0.7722 -1.0427 0.068 Uiso 1 1 calc R . . 
C27 C 1.2419(7) 0.7079(8) -1.2258(6) 0.0439(18) Uani 1 1 d . . . 
C28 C 1.2974(7) 0.7878(6) -1.3978(6) 0.0389(17) Uani 1 1 d . . . 
C29 C 1.1990(6) 0.8854(7) -1.3802(8) 0.0487(18) Uani 1 1 d . . . 
H29A H 1.1574 0.9210 -1.3066 0.058 Uiso 1 1 calc R . . 
C30 C 1.1678(8) 0.9266(8) -1.4891(8) 0.058(2) Uani 1 1 d . . . 
H30A H 1.0974 0.9812 -1.4914 0.069 Uiso 1 1 calc R . . 
C31 C 1.2498(10) 0.8788(9) -1.5875(7) 0.064(2) Uani 1 1 d . . . 
H31A H 1.2422 0.9109 -1.6529 0.077 Uiso 1 1 calc R . . 
C32 C 1.3325(11) 0.7938(10) -1.5879(9) 0.084(3) Uani 1 1 d . . . 
H32A H 1.3767 0.7589 -1.6601 0.101 Uiso 1 1 calc R . . 
N9 N 0.9910(10) 1.2152(17) -0.2478(9) 0.184(6) Uani 1 1 d . . . 
C33 C 0.9300(15) 1.1298(13) -0.0936(9) 0.145(6) Uani 1 1 d . . . 
H33A H 0.9779 1.0590 -0.0782 0.218 Uiso 1 1 calc R . . 
H33B H 0.8352 1.0971 -0.1158 0.218 Uiso 1 1 calc R . . 
H33C H 0.9396 1.2130 -0.0199 0.218 Uiso 1 1 calc R . . 
N10 N 1.5067(9) -0.0297(10) -0.7432(8) 0.120(3) Uani 1 1 d . . . 
C34 C 0.9921(15) 1.1639(14) -0.2050(11) 0.123(4) Uani 1 1 d . . . 
C35 C 1.5848(14) 0.0266(13) -0.9338(13) 0.155(6) Uani 1 1 d . . . 
H35A H 1.5705 -0.0465 -1.0146 0.233 Uiso 1 1 calc R . . 
H35B H 1.6796 0.0608 -0.9165 0.233 Uiso 1 1 calc R . . 
H35C H 1.5314 0.1015 -0.9322 0.233 Uiso 1 1 calc R . . 
C36 C 1.5456(9) -0.0259(11) -0.8437(8) 0.077(2) Uani 1 1 d . . . 
Cl1 Cl 0.0121(3) 0.9705(3) 0.1643(3) 0.0943(9) Uani 1 1 d . . . 
Cl2 Cl 0.4985(3) 1.1824(3) 0.7982(3) 0.0835(8) Uani 1 1 d . . . 
O5 O 0.0291(3) 1.1082(5) 0.1535(6) 0.187(4) Uani 1 1 d D . . 
O6 O -0.1222(9) 0.9346(8) 0.0999(12) 0.346(9) Uani 1 1 d D . . 
O7 O 0.1126(14) 0.9008(15) 0.1322(10) 0.326(7) Uani 1 1 d . . . 
O8 O 0.0233(6) 1.0303(7) 0.3024(5) 0.1081(19) Uani 1 1 d . . . 
O9 O 0.4091(13) 1.2000(14) 0.8860(14) 0.275(6) Uani 1 1 d . . . 
O10 O 0.4951(11) 1.3192(8) 0.7984(8) 0.168(4) Uani 1 1 d . . . 
O11 O 0.4684(9) 1.0841(9) 0.7078(15) 0.313(10) Uani 1 1 d . . . 
O12 O 0.6344(7) 1.2109(11) 0.8344(9) 0.221(6) Uani 1 1 d . . . 
  
loop_ 
 _atom_site_aniso_label 
 _atom_site_aniso_U_11 
 _atom_site_aniso_U_22 
 _atom_site_aniso_U_33 
 _atom_site_aniso_U_23 
 _atom_site_aniso_U_13 
 _atom_site_aniso_U_12 
Ag1 0.0535(4) 0.0667(3) 0.0574(3) 0.0337(2) 0.0116(2) 0.0152(3) 
Ag2 0.0463(3) 0.0687(3) 0.0558(3) 0.0332(2) 0.0142(2) 0.0144(3) 
O1 0.032(2) 0.101(3) 0.072(3) 0.049(3) 0.010(2) 0.019(2) 
O2 0.029(2) 0.088(3) 0.055(2) 0.048(2) 0.0045(19) 0.012(2) 
O3 0.0165(18) 0.102(3) 0.073(3) 0.046(3) 0.0059(18) 0.007(2) 
O4 0.047(3) 0.104(4) 0.047(2) 0.051(3) -0.003(2) 0.002(3) 
N1 0.036(2) 0.046(2) 0.050(3) 0.027(2) -0.001(2) 0.011(2) 
N2 0.029(2) 0.051(2) 0.062(3) 0.033(2) -0.007(2) 0.004(2) 
N3 0.030(2) 0.074(3) 0.030(2) 0.027(2) 0.0085(18) 0.011(2) 
N4 0.047(3) 0.056(3) 0.032(2) 0.021(2) 0.001(2) -0.010(3) 
N5 0.033(2) 0.055(3) 0.057(3) 0.031(2) 0.000(2) 0.004(2) 
N6 0.021(2) 0.057(3) 0.058(3) 0.027(2) -0.0004(19) 0.0063(19) 
N7 0.029(2) 0.075(3) 0.038(2) 0.038(2) 0.0004(19) 0.005(2) 
N8 0.051(3) 0.051(3) 0.032(2) 0.026(2) 0.000(2) -0.002(3) 
C1 0.054(3) 0.041(3) 0.039(3) 0.022(2) -0.002(2) 0.003(3) 
C2 0.068(4) 0.071(4) 0.102(5) 0.065(4) -0.020(4) -0.002(3) 
C3 0.055(4) 0.047(3) 0.098(5) 0.042(3) -0.005(3) 0.010(3) 
C4 0.060(4) 0.067(4) 0.062(4) 0.020(4) 0.000(3) -0.011(4) 
C5 0.019(2) 0.053(3) 0.048(3) 0.013(3) 0.003(2) -0.003(2) 
C6 0.036(3) 0.051(3) 0.034(3) 0.015(2) -0.011(2) 0.014(3) 
C7 0.050(3) 0.061(3) 0.043(3) 0.026(3) 0.007(2) 0.011(3) 
C8 0.034(3) 0.066(4) 0.027(2) 0.017(2) 0.003(2) 0.009(3) 
C9 0.038(3) 0.074(4) 0.060(4) 0.042(3) 0.006(3) 0.009(3) 
C10 0.018(2) 0.102(5) 0.041(3) 0.039(3) 0.003(2) 0.014(3) 
C11 0.037(3) 0.056(4) 0.039(3) 0.023(3) 0.019(2) -0.003(3) 
C12 0.048(3) 0.033(3) 0.039(3) 0.024(2) -0.011(2) 0.000(2) 
C13 0.031(3) 0.045(3) 0.073(4) 0.040(3) 0.013(3) 0.021(2) 
C14 0.046(4) 0.071(4) 0.074(4) 0.051(3) -0.013(3) 0.000(3) 
C15 0.055(4) 0.068(4) 0.047(3) 0.034(3) 0.001(3) 0.003(3) 
C16 0.075(5) 0.091(6) 0.057(4) 0.046(4) -0.009(4) -0.017(5) 
C17 0.045(3) 0.049(3) 0.038(3) 0.028(2) 0.000(2) 0.009(2) 
C18 0.061(4) 0.060(3) 0.106(5) 0.057(4) -0.031(4) -0.015(3) 
C19 0.049(4) 0.062(3) 0.095(5) 0.047(4) -0.012(3) 0.013(3) 
C20 0.061(4) 0.062(4) 0.056(4) 0.021(3) 0.013(3) -0.004(3) 
C21 0.029(3) 0.060(3) 0.037(3) 0.022(3) 0.004(2) 0.005(3) 
C22 0.021(3) 0.076(4) 0.056(3) 0.039(3) -0.005(2) 0.010(3) 
C23 0.042(3) 0.203(7) 0.095(4) 0.119(4) 0.011(3) 0.001(4) 
C24 0.038(3) 0.086(4) 0.045(3) 0.038(3) 0.006(2) 0.010(3) 
C25 0.046(4) 0.079(4) 0.035(3) 0.028(3) -0.001(2) 0.002(3) 
C26 0.028(3) 0.094(4) 0.052(3) 0.036(3) -0.014(2) -0.002(3) 
C27 0.042(4) 0.060(4) 0.032(3) 0.019(3) 0.007(3) -0.003(3) 
C28 0.033(3) 0.038(3) 0.052(3) 0.029(3) -0.012(3) -0.007(3) 
C29 0.029(3) 0.046(3) 0.087(5) 0.043(3) 0.000(3) 0.013(3) 
C30 0.043(3) 0.055(3) 0.089(5) 0.049(3) -0.018(3) -0.002(3) 
C31 0.083(5) 0.076(5) 0.052(3) 0.048(3) -0.005(3) 0.005(4) 
C32 0.104(7) 0.096(6) 0.063(5) 0.052(4) -0.016(5) -0.025(6) 
N9 0.092(5) 0.387(15) 0.102(6) 0.107(8) 0.024(5) 0.103(7) 
C33 0.210(14) 0.148(10) 0.065(5) 0.020(6) 0.015(7) 0.024(10) 
N10 0.105(5) 0.193(7) 0.125(5) 0.116(5) 0.060(4) 0.064(5) 
C34 0.154(10) 0.154(8) 0.093(7) 0.083(6) -0.018(6) 0.045(7) 
C35 0.158(12) 0.159(9) 0.198(12) 0.139(9) -0.031(9) -0.021(9) 
C36 0.068(4) 0.113(6) 0.060(4) 0.040(4) 0.008(3) 0.021(4) 
Cl1 0.0976(18) 0.0987(15) 0.0947(16) 0.0457(14) -0.0090(14) 0.0210(14) 
Cl2 0.0755(15) 0.0880(15) 0.0978(17) 0.0499(13) 0.0014(12) -0.0042(13) 
O5 0.334(12) 0.138(5) 0.118(5) 0.094(4) -0.002(6) -0.020(6) 
O6 0.434(18) 0.187(10) 0.370(16) 0.111(10) -0.273(15) -0.063(12) 
O7 0.429(12) 0.410(13) 0.160(8) 0.064(8) 0.082(9) 0.361(10) 
O8 0.102(4) 0.170(5) 0.073(3) 0.062(3) 0.008(2) 0.051(4) 
O9 0.297(11) 0.256(11) 0.367(14) 0.173(10) 0.244(10) 0.148(9) 
O10 0.261(10) 0.095(4) 0.139(6) 0.044(4) -0.033(6) -0.012(5) 
O11 0.115(6) 0.122(6) 0.48(2) -0.155(9) 0.050(9) -0.026(5) 
O12 0.076(4) 0.268(11) 0.184(8) -0.076(7) -0.042(4) 0.044(5) 
  
_geom_special_details 
; 
 All esds (except the esd in the dihedral angle between two l.s. planes) 
 are estimated using the full covariance matrix.  The cell esds are taken 
 into account individually in the estimation of esds in distances, angles 
 and torsion angles; correlations between esds in cell parameters are only 
 used when they are defined by crystal symmetry.  An approximate (isotropic) 
 treatment of cell esds is used for estimating esds involving l.s. planes. 
; 
  
loop_ 
 _geom_bond_atom_site_label_1 
 _geom_bond_atom_site_label_2 
 _geom_bond_distance 
 _geom_bond_site_symmetry_2 
 _geom_bond_publ_flag 
Ag1 N8 2.101(6) 1_457 ? 
Ag1 N1 2.170(5) . ? 
Ag2 N4 2.084(6) . ? 
Ag2 N5 2.154(6) . ? 
O1 C6 1.251(7) . ? 
O2 C11 1.195(8) . ? 
O3 C22 1.246(7) . ? 
O4 C27 1.197(8) . ? 
N1 C1 1.271(9) . ? 
N1 C5 1.380(8) . ? 
N2 C6 1.306(9) . ? 
N2 C5 1.331(9) . ? 
N3 C11 1.403(7) . ? 
N3 C12 1.472(8) . ? 
N4 C12 1.303(9) . ? 
N4 C16 1.448(11) . ? 
N5 C17 1.291(9) . ? 
N5 C21 1.378(8) . ? 
N6 C22 1.296(9) . ? 
N6 C21 1.341(9) . ? 
N7 C27 1.397(9) . ? 
N7 C28 1.470(8) . ? 
N8 C28 1.289(9) . ? 
N8 C32 1.455(11) . ? 
N8 Ag1 2.101(6) 1_653 ? 
C1 C2 1.475(10) . ? 
C2 C3 1.304(12) . ? 
C3 C4 1.291(12) . ? 
C4 C5 1.327(11) . ? 
C6 C7 1.515(9) . ? 
C7 C8 1.593(9) . ? 
C8 C9 1.528(5) . ? 
C9 C10 1.418(10) . ? 
C10 C11 1.500(10) . ? 
C12 C13 1.427(8) . ? 
C13 C14 1.467(11) . ? 
C14 C15 1.428(11) . ? 
C15 C16 1.261(13) . ? 
C17 C18 1.448(10) . ? 
C18 C19 1.319(13) . ? 
C19 C20 1.276(12) . ? 
C20 C21 1.343(11) . ? 
C22 C23 1.535(10) . ? 
C23 C24 1.539(11) . ? 
C24 C25 1.493(5) . ? 
C25 C26 1.420(11) . ? 
C26 C27 1.505(10) . ? 
C28 C29 1.416(9) . ? 
C29 C30 1.489(11) . ? 
C30 C31 1.397(12) . ? 
C31 C32 1.237(14) . ? 
N9 C34 0.846(18) . ? 
C33 C34 1.595(19) . ? 
N10 C36 1.258(12) . ? 
C35 C36 1.397(16) . ? 
Cl1 O7 1.261(10) . ? 
Cl1 O6 1.438(8) . ? 
Cl1 O5 1.467(6) . ? 
Cl1 O8 1.484(6) . ? 
Cl2 O11 1.168(9) . ? 
Cl2 O9 1.355(11) . ? 
Cl2 O12 1.362(7) . ? 
Cl2 O10 1.412(8) . ? 
  
loop_ 
 _geom_angle_atom_site_label_1 
 _geom_angle_atom_site_label_2 
 _geom_angle_atom_site_label_3 
 _geom_angle 
 _geom_angle_site_symmetry_1 
 _geom_angle_site_symmetry_3 
 _geom_angle_publ_flag 
N8 Ag1 N1 178.5(2) 1_457 . ? 
N4 Ag2 N5 178.8(2) . . ? 
C1 N1 C5 121.7(6) . . ? 
C1 N1 Ag1 118.7(4) . . ? 
C5 N1 Ag1 119.6(4) . . ? 
C6 N2 C5 128.0(5) . . ? 
C11 N3 C12 123.9(6) . . ? 
C12 N4 C16 113.7(7) . . ? 
C12 N4 Ag2 125.4(5) . . ? 
C16 N4 Ag2 120.5(5) . . ? 
C17 N5 C21 121.7(6) . . ? 
C17 N5 Ag2 118.2(4) . . ? 
C21 N5 Ag2 119.9(5) . . ? 
C22 N6 C21 128.8(5) . . ? 
C27 N7 C28 120.3(6) . . ? 
C28 N8 C32 111.4(7) . . ? 
C28 N8 Ag1 124.0(5) . 1_653 ? 
C32 N8 Ag1 123.9(6) . 1_653 ? 
N1 C1 C2 120.3(6) . . ? 
C3 C2 C1 115.1(8) . . ? 
C4 C3 C2 121.5(8) . . ? 
C3 C4 C5 125.5(8) . . ? 
C4 C5 N2 127.0(7) . . ? 
C4 C5 N1 115.2(7) . . ? 
N2 C5 N1 117.7(6) . . ? 
O1 C6 N2 123.3(6) . . ? 
O1 C6 C7 122.4(6) . . ? 
N2 C6 C7 114.2(5) . . ? 
C6 C7 C8 114.4(5) . . ? 
C9 C8 C7 111.6(4) . . ? 
C10 C9 C8 111.5(5) . . ? 
C9 C10 C11 114.4(5) . . ? 
O2 C11 N3 121.9(7) . . ? 
O2 C11 C10 126.0(6) . . ? 
N3 C11 C10 111.9(6) . . ? 
N4 C12 C13 128.1(6) . . ? 
N4 C12 N3 111.7(6) . . ? 
C13 C12 N3 119.9(6) . . ? 
C12 C13 C14 114.4(6) . . ? 
C15 C14 C13 116.0(7) . . ? 
C16 C15 C14 122.8(8) . . ? 
C15 C16 N4 124.4(9) . . ? 
N5 C17 C18 119.0(6) . . ? 
C19 C18 C17 116.3(8) . . ? 
C20 C19 C18 122.5(8) . . ? 
C19 C20 C21 123.4(8) . . ? 
N6 C21 C20 126.2(6) . . ? 
N6 C21 N5 117.3(6) . . ? 
C20 C21 N5 116.3(7) . . ? 
O3 C22 N6 120.3(7) . . ? 
O3 C22 C23 125.6(7) . . ? 
N6 C22 C23 114.1(5) . . ? 
C22 C23 C24 114.2(6) . . ? 
C25 C24 C23 114.7(5) . . ? 
C26 C25 C24 113.3(5) . . ? 
C25 C26 C27 116.2(5) . . ? 
O4 C27 N7 123.8(7) . . ? 
O4 C27 C26 121.7(6) . . ? 
N7 C27 C26 114.4(6) . . ? 
N8 C28 C29 128.0(7) . . ? 
N8 C28 N7 112.3(6) . . ? 
C29 C28 N7 119.3(7) . . ? 
C28 C29 C30 114.6(7) . . ? 
C31 C30 C29 116.5(7) . . ? 
C32 C31 C30 120.2(8) . . ? 
C31 C32 N8 128.7(9) . . ? 
N9 C34 C33 146.2(18) . . ? 
N10 C36 C35 160.5(12) . . ? 
O7 Cl1 O6 125.1(8) . . ? 
O7 Cl1 O5 113.2(9) . . ? 
O6 Cl1 O5 94.3(4) . . ? 
O7 Cl1 O8 107.3(6) . . ? 
O6 Cl1 O8 117.9(7) . . ? 
O5 Cl1 O8 93.4(4) . . ? 
O11 Cl2 O9 113.7(9) . . ? 
O11 Cl2 O12 115.4(6) . . ? 
O9 Cl2 O12 119.1(9) . . ? 
O11 Cl2 O10 121.6(10) . . ? 
O9 Cl2 O10 94.2(7) . . ? 
O12 Cl2 O10 89.2(6) . . ? 
  
_diffrn_measured_fraction_theta_max    0.992 
_diffrn_reflns_theta_full              25.17 
_diffrn_measured_fraction_theta_full   0.992 
_refine_diff_density_max    0.934 
_refine_diff_density_min   -0.417 
_refine_diff_density_rms    0.074 
  
#===END

data_7 
  
_audit_creation_method            SHELXL-97 
_chemical_name_systematic 
; 
 ? 
; 
_chemical_name_common             ? 
_chemical_melting_point           ? 
_chemical_formula_moiety          ? 
_chemical_formula_sum 
 'C16 H19.33 Ag Cl N4 O6.67' 
_chemical_formula_weight          517.67 
  
loop_ 
 _atom_type_symbol 
 _atom_type_description 
 _atom_type_scat_dispersion_real 
 _atom_type_scat_dispersion_imag 
 _atom_type_scat_source 
 'C'  'C'   0.0033   0.0016 
 'International Tables Vol C Tables 4.2.6.8 and 6.1.1.4' 
 'H'  'H'   0.0000   0.0000 
 'International Tables Vol C Tables 4.2.6.8 and 6.1.1.4' 
 'N'  'N'   0.0061   0.0033 
 'International Tables Vol C Tables 4.2.6.8 and 6.1.1.4' 
 'O'  'O'   0.0106   0.0060 
 'International Tables Vol C Tables 4.2.6.8 and 6.1.1.4' 
 'Cl'  'Cl'   0.1484   0.1585 
 'International Tables Vol C Tables 4.2.6.8 and 6.1.1.4' 
 'Ag'  'Ag'  -0.8971   1.1015 
 'International Tables Vol C Tables 4.2.6.8 and 6.1.1.4' 
  
_symmetry_cell_setting            Monoclinic 
_symmetry_space_group_name_H-M    P2(1)/n 
  
loop_ 
 _symmetry_equiv_pos_as_xyz 
 'x, y, z' 
 '-x+1/2, y+1/2, -z+1/2' 
 '-x, -y, -z' 
 'x-1/2, -y-1/2, z-1/2' 
  
_cell_length_a                    17.281(4) 
_cell_length_b                    14.731(3) 
_cell_length_c                    23.027(5) 
_cell_angle_alpha                 90.00 
_cell_angle_beta                  101.453(4) 
_cell_angle_gamma                 90.00 
_cell_volume                      5745(2) 
_cell_formula_units_Z             12 
_cell_measurement_temperature     298(2) 
_cell_measurement_reflns_used     984 
_cell_measurement_theta_min       2.74 
_cell_measurement_theta_max       25.03 
  
_exptl_crystal_description        plate 
_exptl_crystal_colour             'light yellow' 
_exptl_crystal_size_max           0.6 
_exptl_crystal_size_mid           0.4 
_exptl_crystal_size_min           0.1 
_exptl_crystal_density_meas       0 
_exptl_crystal_density_diffrn     1.795 
_exptl_crystal_density_method     'not measured' 
_exptl_crystal_F_000              3128 
_exptl_absorpt_coefficient_mu     1.238 
_exptl_absorpt_correction_type    empirical 
_exptl_absorpt_correction_T_min   0.6588 
_exptl_absorpt_correction_T_max   0.9148 
_exptl_absorpt_process_details    ? 
  
_exptl_special_details 
; 
 ? 
; 
  
_diffrn_ambient_temperature       298(2) 
_diffrn_radiation_wavelength      0.71073 
_diffrn_radiation_type            MoK\a 
_diffrn_radiation_source          'fine-focus sealed tube' 
_diffrn_radiation_monochromator   graphite 
_diffrn_measurement_device_type   'CCD area detector' 
_diffrn_measurement_method        'phi and omega scans' 
_diffrn_detector_area_resol_mean  ? 
_diffrn_standards_number          ? 
_diffrn_standards_interval_count  ? 
_diffrn_standards_interval_time   ? 
_diffrn_standards_decay_%         ? 
_diffrn_reflns_number             23558 
_diffrn_reflns_av_R_equivalents   0.0348 
_diffrn_reflns_av_sigmaI/netI     0.0301 
_diffrn_reflns_limit_h_min        -20 
_diffrn_reflns_limit_h_max        20 
_diffrn_reflns_limit_k_min        -9 
_diffrn_reflns_limit_k_max        17 
_diffrn_reflns_limit_l_min        -27 
_diffrn_reflns_limit_l_max        16 
_diffrn_reflns_theta_min          2.27 
_diffrn_reflns_theta_max          25.06 
_reflns_number_total              10072 
_reflns_number_gt                 7260 
_reflns_threshold_expression      >2sigma(I) 
  
_computing_data_collection        'Bruker SMART' 
_computing_cell_refinement        'Bruker SMART' 
_computing_data_reduction         'Bruker SAINT' 
_computing_structure_solution     'SHELXS-97 (Sheldrick, 1990)' 
_computing_structure_refinement   'SHELXL-97 (Sheldrick, 1997)' 
_computing_molecular_graphics     'Bruker SHELXTL' 
_computing_publication_material   'Bruker SHELXTL' 
  
_refine_special_details 
; 
 Refinement of F^2^ against ALL reflections.  The weighted R-factor wR and 
 goodness of fit S are based on F^2^, conventional R-factors R are based 
 on F, with F set to zero for negative F^2^. The threshold expression of 
 F^2^ > 2sigma(F^2^) is used only for calculating R-factors(gt) etc. and is 
 not relevant to the choice of reflections for refinement.  R-factors based 
 on F^2^ are statistically about twice as large as those based on F, and R- 
 factors based on ALL data will be even larger. 
; 
  
_refine_ls_structure_factor_coef  Fsqd 
_refine_ls_matrix_type            full 
_refine_ls_weighting_scheme       calc 
_refine_ls_weighting_details 
 'calc w=1/[\s^2^(Fo^2^)+(0.0850P)^2^+20.1995P] where P=(Fo^2^+2Fc^2^)/3' 
_atom_sites_solution_primary      direct 
_atom_sites_solution_secondary    difmap 
_atom_sites_solution_hydrogens    geom 
_refine_ls_hydrogen_treatment     constr 
_refine_ls_extinction_method      none 
_refine_ls_extinction_coef        ? 
_refine_ls_number_reflns          10072 
_refine_ls_number_parameters      775 
_refine_ls_number_restraints      0 
_refine_ls_R_factor_all           0.0857 
_refine_ls_R_factor_gt            0.0578 
_refine_ls_wR_factor_ref          0.1824 
_refine_ls_wR_factor_gt           0.1540 
_refine_ls_goodness_of_fit_ref    1.060 
_refine_ls_restrained_S_all       1.060 
_refine_ls_shift/su_max           0.001 
_refine_ls_shift/su_mean          0.000 
  
loop_ 
 _atom_site_label 
 _atom_site_type_symbol 
 _atom_site_fract_x 
 _atom_site_fract_y 
 _atom_site_fract_z 
 _atom_site_U_iso_or_equiv 
 _atom_site_adp_type 
 _atom_site_occupancy 
 _atom_site_symmetry_multiplicity 
 _atom_site_calc_flag 
 _atom_site_refinement_flags 
 _atom_site_disorder_assembly 
 _atom_site_disorder_group 
Ag1 Ag 0.33981(3) 0.76108(4) 0.38640(3) 0.06009(19) Uani 1 1 d . . . 
Ag2 Ag 0.85412(3) 0.24666(4) 0.12971(2) 0.04832(17) Uani 1 1 d . . . 
Ag3 Ag 0.54477(3) 0.22994(4) 0.14056(2) 0.05582(18) Uani 1 1 d . . . 
O1 O 0.6345(3) 0.8769(4) 0.4635(2) 0.0580(12) Uani 1 1 d . . . 
O2 O 0.0785(3) 0.6224(5) 0.2605(2) 0.0750(16) Uani 1 1 d . . . 
O3 O 0.5715(2) 0.3629(4) 0.03090(19) 0.0560(12) Uani 1 1 d . . . 
O4 O 1.1322(2) 0.1393(3) 0.23005(19) 0.0527(12) Uani 1 1 d . . . 
O5 O 0.8396(2) 0.1297(3) 0.22277(18) 0.0492(11) Uani 1 1 d . . . 
O6 O 0.2903(3) 0.4121(4) 0.0194(2) 0.0711(16) Uani 1 1 d . . . 
N1 N 0.4189(3) 0.8476(4) 0.3506(2) 0.0452(12) Uani 1 1 d . . . 
N2 N 0.5004(3) 0.8786(4) 0.4407(2) 0.0438(12) Uani 1 1 d . . . 
H2N H 0.4591 0.8760 0.4562 0.053 Uiso 1 1 calc R . . 
N3 N 0.2450(3) 0.6822(4) 0.4072(2) 0.0453(12) Uani 1 1 d . . . 
N4 N 0.2034(3) 0.6397(4) 0.3090(2) 0.0469(13) Uani 1 1 d . . . 
H4N H 0.2513 0.6479 0.3048 0.056 Uiso 1 1 calc R . . 
N5 N 0.7730(3) 0.3370(3) 0.1612(2) 0.0376(11) Uani 1 1 d . . . 
N6 N 0.7039(3) 0.3604(3) 0.0664(2) 0.0369(11) Uani 1 1 d . . . 
H6N H 0.7488 0.3562 0.0558 0.044 Uiso 1 1 calc R . . 
N7 N 0.9377(3) 0.1616(3) 0.0973(2) 0.0367(10) Uani 1 1 d . . . 
N8 N 1.0009(3) 0.1293(4) 0.1929(2) 0.0417(12) Uani 1 1 d . . . 
H8N H 0.9553 0.1295 0.2026 0.050 Uiso 1 1 calc R . . 
N9 N 0.6281(3) 0.1506(3) 0.1038(2) 0.0363(10) Uani 1 1 d . . . 
N10 N 0.7053(3) 0.1225(3) 0.1958(2) 0.0393(11) Uani 1 1 d . . . 
H10N H 0.6627 0.1241 0.2097 0.047 Uiso 1 1 calc R . . 
N11 N 0.4587(3) 0.3244(4) 0.1634(2) 0.0420(11) Uani 1 1 d . . . 
N12 N 0.4090(3) 0.3602(4) 0.0659(2) 0.0459(12) Uani 1 1 d . . . 
H12N H 0.4536 0.3405 0.0600 0.055 Uiso 1 1 calc R . . 
C1 C 0.4009(4) 0.8547(5) 0.2904(3) 0.0563(17) Uani 1 1 d . . . 
H1A H 0.3530 0.8312 0.2704 0.068 Uiso 1 1 calc R . . 
C2 C 0.4500(5) 0.8947(5) 0.2582(3) 0.0608(19) Uani 1 1 d . . . 
H2B H 0.4359 0.8985 0.2171 0.073 Uiso 1 1 calc R . . 
C3 C 0.5203(4) 0.9290(5) 0.2877(3) 0.0606(19) Uani 1 1 d . . . 
H3A H 0.5554 0.9548 0.2666 0.073 Uiso 1 1 calc R . . 
C4 C 0.5397(4) 0.9254(5) 0.3490(3) 0.0506(16) Uani 1 1 d . . . 
H4B H 0.5866 0.9503 0.3696 0.061 Uiso 1 1 calc R . . 
C5 C 0.4867(4) 0.8835(4) 0.3790(3) 0.0429(14) Uani 1 1 d . . . 
C6 C 0.5713(4) 0.8773(4) 0.4797(3) 0.0447(14) Uani 1 1 d . . . 
C7 C 0.5624(4) 0.8736(5) 0.5429(3) 0.0555(17) Uani 1 1 d . . . 
H7A H 0.5249 0.9202 0.5485 0.067 Uiso 1 1 calc R . . 
H7B H 0.5390 0.8155 0.5492 0.067 Uiso 1 1 calc R . . 
C8 C 0.6344(4) 0.8853(6) 0.5899(3) 0.0570(18) Uani 1 1 d . . . 
H8B H 0.6569 0.9449 0.5867 0.068 Uiso 1 1 calc R . . 
H8C H 0.6735 0.8400 0.5852 0.068 Uiso 1 1 calc R . . 
C9 C 0.2369(5) 0.6810(5) 0.4650(3) 0.0605(18) Uani 1 1 d . . . 
H9A H 0.2753 0.7089 0.4933 0.073 Uiso 1 1 calc R . . 
C10 C 0.1746(5) 0.6406(6) 0.4826(3) 0.068(2) Uani 1 1 d . . . 
H10B H 0.1707 0.6410 0.5223 0.081 Uiso 1 1 calc R . . 
C11 C 0.1176(4) 0.5992(5) 0.4408(3) 0.0595(18) Uani 1 1 d . . . 
H11A H 0.0738 0.5729 0.4520 0.071 Uiso 1 1 calc R . . 
C12 C 0.1255(4) 0.5969(5) 0.3821(3) 0.0519(16) Uani 1 1 d . . . 
H12B H 0.0885 0.5670 0.3537 0.062 Uiso 1 1 calc R . . 
C13 C 0.1899(3) 0.6401(4) 0.3668(3) 0.0408(13) Uani 1 1 d . . . 
C14 C 0.1482(4) 0.6276(5) 0.2592(3) 0.0503(16) Uani 1 1 d . . . 
C15 C 0.1774(4) 0.6226(6) 0.2022(3) 0.066(2) Uani 1 1 d . . . 
H15A H 0.2128 0.6730 0.2002 0.079 Uiso 1 1 calc R . . 
H15B H 0.2070 0.5668 0.2014 0.079 Uiso 1 1 calc R . . 
C16 C 0.1120(4) 0.6253(6) 0.1502(3) 0.0609(19) Uani 1 1 d . . . 
H16A H 0.0846 0.6827 0.1506 0.091 Uiso 1 1 calc R . . 
H16B H 0.0749 0.5775 0.1545 0.091 Uiso 1 1 calc R . . 
C17 C 0.7830(4) 0.3478(4) 0.2208(3) 0.0452(14) Uani 1 1 d . . . 
H17A H 0.8304 0.3290 0.2443 0.054 Uiso 1 1 calc R . . 
C18 C 0.7271(4) 0.3846(5) 0.2478(3) 0.0487(15) Uani 1 1 d . . . 
H18A H 0.7358 0.3908 0.2888 0.058 Uiso 1 1 calc R . . 
C19 C 0.6562(4) 0.4128(5) 0.2119(3) 0.0493(15) Uani 1 1 d . . . 
H19A H 0.6162 0.4370 0.2288 0.059 Uiso 1 1 calc R . . 
C20 C 0.6461(4) 0.4045(4) 0.1512(3) 0.0428(14) Uani 1 1 d . . . 
H20A H 0.5994 0.4235 0.1267 0.051 Uiso 1 1 calc R . . 
C21 C 0.7065(3) 0.3675(4) 0.1273(2) 0.0328(12) Uani 1 1 d . . . 
C22 C 0.6388(3) 0.3592(4) 0.0214(3) 0.0392(13) Uani 1 1 d . . . 
C23 C 0.6578(4) 0.3506(5) -0.0391(3) 0.0453(14) Uani 1 1 d . . . 
H23A H 0.6800 0.2908 -0.0426 0.054 Uiso 1 1 calc R . . 
H23B H 0.6981 0.3949 -0.0428 0.054 Uiso 1 1 calc R . . 
C24 C 0.5886(4) 0.3638(5) -0.0896(3) 0.0467(15) Uani 1 1 d . . . 
H24A H 0.5669 0.4241 -0.0871 0.056 Uiso 1 1 calc R . . 
H24B H 0.5478 0.3201 -0.0861 0.056 Uiso 1 1 calc R . . 
C25 C 0.9328(4) 0.1562(4) 0.0379(3) 0.0435(14) Uani 1 1 d . . . 
H25A H 0.8877 0.1786 0.0131 0.052 Uiso 1 1 calc R . . 
C26 C 0.9903(4) 0.1198(5) 0.0127(3) 0.0500(16) Uani 1 1 d . . . 
H26A H 0.9854 0.1190 -0.0282 0.060 Uiso 1 1 calc R . . 
C27 C 1.0564(4) 0.0841(5) 0.0495(3) 0.0500(16) Uani 1 1 d . . . 
H27A H 1.0971 0.0595 0.0334 0.060 Uiso 1 1 calc R . . 
C28 C 1.0616(3) 0.0851(4) 0.1099(3) 0.0434(14) Uani 1 1 d . . . 
H28A H 1.1047 0.0592 0.1351 0.052 Uiso 1 1 calc R . . 
C29 C 1.0018(3) 0.1255(4) 0.1326(2) 0.0339(12) Uani 1 1 d . . . 
C30 C 1.0652(3) 0.1329(4) 0.2381(3) 0.0392(13) Uani 1 1 d . . . 
C31 C 1.0444(4) 0.1291(5) 0.2992(3) 0.0503(16) Uani 1 1 d . . . 
H31A H 1.0029 0.1730 0.3005 0.060 Uiso 1 1 calc R . . 
H31B H 1.0233 0.0694 0.3046 0.060 Uiso 1 1 calc R . . 
C32 C 1.1117(4) 0.1477(5) 0.3499(3) 0.0456(14) Uani 1 1 d . . . 
H32A H 1.1303 0.2092 0.3466 0.068 Uiso 1 1 calc R . . 
H32B H 1.1548 0.1066 0.3475 0.068 Uiso 1 1 calc R . . 
C33 C 0.6140(4) 0.1410(4) 0.0442(3) 0.0475(15) Uani 1 1 d . . . 
H33A H 0.5659 0.1618 0.0227 0.057 Uiso 1 1 calc R . . 
C34 C 0.6653(4) 0.1030(5) 0.0138(3) 0.0543(17) Uani 1 1 d . . . 
H34A H 0.6539 0.1008 -0.0274 0.065 Uiso 1 1 calc R . . 
C35 C 0.7344(4) 0.0681(5) 0.0454(3) 0.0547(17) Uani 1 1 d . . . 
H35A H 0.7706 0.0411 0.0258 0.066 Uiso 1 1 calc R . . 
C36 C 0.7504(4) 0.0731(4) 0.1065(3) 0.0447(14) Uani 1 1 d . . . 
H36A H 0.7966 0.0487 0.1285 0.054 Uiso 1 1 calc R . . 
C37 C 0.6960(3) 0.1152(4) 0.1341(2) 0.0351(12) Uani 1 1 d . . . 
C38 C 0.7745(3) 0.1275(4) 0.2361(2) 0.0370(13) Uani 1 1 d . . . 
C39 C 0.7621(4) 0.1325(5) 0.2992(2) 0.0465(15) Uani 1 1 d . . . 
H39A H 0.7335 0.0787 0.3071 0.056 Uiso 1 1 calc R . . 
H39B H 0.7289 0.1846 0.3027 0.056 Uiso 1 1 calc R . . 
C40 C 0.8366(4) 0.1399(4) 0.3465(2) 0.0416(13) Uani 1 1 d . . . 
H40A H 0.8617 0.1983 0.3438 0.050 Uiso 1 1 calc R . . 
H40B H 0.8736 0.0925 0.3412 0.050 Uiso 1 1 calc R . . 
C41 C 0.4571(4) 0.3306(5) 0.2218(3) 0.0580(18) Uani 1 1 d . . . 
H41A H 0.4980 0.3037 0.2487 0.070 Uiso 1 1 calc R . . 
C42 C 0.3998(5) 0.3734(5) 0.2430(3) 0.0600(19) Uani 1 1 d . . . 
H42A H 0.4018 0.3776 0.2836 0.072 Uiso 1 1 calc R . . 
C43 C 0.3382(4) 0.4106(5) 0.2033(3) 0.0574(18) Uani 1 1 d . . . 
H43A H 0.2965 0.4381 0.2166 0.069 Uiso 1 1 calc R . . 
C44 C 0.3385(4) 0.4072(5) 0.1438(3) 0.0511(16) Uani 1 1 d . . . 
H44A H 0.2976 0.4330 0.1164 0.061 Uiso 1 1 calc R . . 
C45 C 0.4008(3) 0.3649(4) 0.1253(2) 0.0382(13) Uani 1 1 d . . . 
C46 C 0.3555(3) 0.3829(4) 0.0170(3) 0.0431(14) Uani 1 1 d . . . 
C47 C 0.3812(4) 0.3680(5) -0.0417(3) 0.0509(16) Uani 1 1 d . . . 
H47A H 0.4187 0.4148 -0.0469 0.061 Uiso 1 1 calc R . . 
H47B H 0.4077 0.3098 -0.0408 0.061 Uiso 1 1 calc R . . 
C48 C 0.3131(4) 0.3700(5) -0.0931(3) 0.0485(15) Uani 1 1 d . . . 
H48A H 0.2851 0.4270 -0.0924 0.073 Uiso 1 1 calc R . . 
H48B H 0.2770 0.3214 -0.0885 0.073 Uiso 1 1 calc R . . 
Cl1 Cl 0.22790(14) 0.88809(15) 0.12692(9) 0.0712(5) Uani 1 1 d . . . 
O7 O 0.2941(13) 0.8555(13) 0.1192(8) 0.377(17) Uani 1 1 d . . . 
O8 O 0.1550(10) 0.8482(9) 0.1152(6) 0.251(8) Uani 1 1 d . . . 
O9 O 0.2370(7) 0.9218(15) 0.1800(4) 0.293(11) Uani 1 1 d . . . 
O10 O 0.2165(5) 0.9648(6) 0.0856(4) 0.136(3) Uani 1 1 d . . . 
Cl2 Cl 0.55880(11) 0.89774(15) 0.12249(8) 0.0620(5) Uani 1 1 d . . . 
O11 O 0.5311(6) 0.9082(13) 0.0647(4) 0.242(8) Uani 1 1 d . . . 
O12 O 0.5344(8) 0.8291(6) 0.1537(6) 0.207(7) Uani 1 1 d . . . 
O13 O 0.6420(4) 0.8865(7) 0.1278(4) 0.127(3) Uani 1 1 d . . . 
O14 O 0.5475(6) 0.9796(5) 0.1530(4) 0.128(3) Uani 1 1 d . . . 
Cl3 Cl 0.10310(15) 0.1674(2) -0.11957(9) 0.0887(8) Uani 1 1 d . . . 
O15 O 0.0923(12) 0.2410(14) -0.0909(11) 0.345(13) Uani 1 1 d . . . 
O16 O 0.1190(10) 0.180(2) -0.1675(6) 0.409(18) Uani 1 1 d . . . 
O17 O 0.1461(13) 0.1238(15) -0.0832(8) 0.423(19) Uani 1 1 d . . . 
O18 O 0.0362(13) 0.138(2) -0.1344(7) 0.44(2) Uani 1 1 d . . . 
O19 O -0.0766(3) 0.6522(5) 0.2440(3) 0.0863(18) Uani 1 1 d . . . 
O20 O 0.1311(3) 0.3627(6) -0.0007(3) 0.106(2) Uani 1 1 d . . . 
  
loop_ 
 _atom_site_aniso_label 
 _atom_site_aniso_U_11 
 _atom_site_aniso_U_22 
 _atom_site_aniso_U_33 
 _atom_site_aniso_U_23 
 _atom_site_aniso_U_13 
 _atom_site_aniso_U_12 
Ag1 0.0487(3) 0.0749(4) 0.0551(3) 0.0003(3) 0.0063(2) -0.0187(3) 
Ag2 0.0409(3) 0.0670(3) 0.0375(3) 0.0040(2) 0.0087(2) 0.0181(2) 
Ag3 0.0482(3) 0.0692(4) 0.0479(3) 0.0005(2) 0.0045(2) 0.0208(2) 
O1 0.036(2) 0.089(4) 0.049(3) -0.002(2) 0.008(2) -0.001(2) 
O2 0.034(3) 0.126(5) 0.063(3) 0.001(3) 0.005(2) -0.001(3) 
O3 0.036(2) 0.089(4) 0.042(2) -0.004(2) 0.0055(19) 0.006(2) 
O4 0.030(2) 0.084(3) 0.044(2) -0.003(2) 0.0056(18) 0.003(2) 
O5 0.033(2) 0.075(3) 0.040(2) 0.004(2) 0.0094(18) 0.003(2) 
O6 0.048(3) 0.115(5) 0.048(3) -0.004(3) 0.003(2) 0.027(3) 
N1 0.041(3) 0.050(3) 0.044(3) 0.000(2) 0.006(2) 0.000(2) 
N2 0.034(3) 0.056(3) 0.042(3) 0.001(2) 0.009(2) 0.000(2) 
N3 0.045(3) 0.047(3) 0.043(3) -0.001(2) 0.006(2) 0.000(2) 
N4 0.033(2) 0.064(3) 0.044(3) -0.005(3) 0.006(2) -0.004(2) 
N5 0.038(2) 0.044(3) 0.031(2) 0.003(2) 0.006(2) 0.001(2) 
N6 0.029(2) 0.048(3) 0.033(3) -0.001(2) 0.0040(19) 0.004(2) 
N7 0.035(2) 0.045(3) 0.029(2) -0.002(2) 0.0049(19) 0.001(2) 
N8 0.032(2) 0.061(3) 0.032(3) 0.000(2) 0.005(2) 0.005(2) 
N9 0.036(2) 0.038(3) 0.033(2) -0.005(2) 0.0025(19) -0.002(2) 
N10 0.034(2) 0.054(3) 0.030(2) 0.003(2) 0.0067(19) 0.004(2) 
N11 0.043(3) 0.055(3) 0.028(2) 0.001(2) 0.008(2) 0.009(2) 
N12 0.041(3) 0.065(4) 0.030(3) -0.002(2) 0.004(2) 0.011(2) 
C1 0.054(4) 0.060(4) 0.051(4) 0.000(3) 0.001(3) 0.003(3) 
C2 0.070(5) 0.075(5) 0.039(4) 0.009(3) 0.012(3) 0.013(4) 
C3 0.061(4) 0.069(5) 0.058(4) 0.021(4) 0.025(4) 0.007(4) 
C4 0.043(3) 0.055(4) 0.055(4) 0.011(3) 0.013(3) 0.000(3) 
C5 0.044(3) 0.038(3) 0.048(4) 0.005(3) 0.012(3) 0.008(3) 
C6 0.041(3) 0.046(4) 0.046(4) -0.004(3) 0.007(3) -0.002(3) 
C7 0.052(4) 0.076(5) 0.039(4) -0.007(3) 0.009(3) 0.000(3) 
C8 0.039(3) 0.084(5) 0.047(4) 0.006(3) 0.006(3) 0.002(3) 
C9 0.076(5) 0.061(4) 0.047(4) 0.001(3) 0.016(4) -0.006(4) 
C10 0.083(6) 0.072(5) 0.051(4) 0.007(4) 0.023(4) 0.004(4) 
C11 0.059(4) 0.055(4) 0.072(5) 0.012(4) 0.031(4) 0.003(3) 
C12 0.044(3) 0.049(4) 0.065(4) 0.002(3) 0.015(3) -0.002(3) 
C13 0.038(3) 0.042(3) 0.044(3) 0.002(3) 0.011(3) 0.005(3) 
C14 0.038(3) 0.057(4) 0.054(4) 0.000(3) 0.008(3) 0.004(3) 
C15 0.040(4) 0.102(6) 0.052(4) -0.012(4) 0.001(3) 0.003(4) 
C16 0.051(4) 0.084(5) 0.046(4) 0.013(4) 0.006(3) -0.009(4) 
C17 0.046(3) 0.051(4) 0.035(3) 0.003(3) 0.000(3) -0.001(3) 
C18 0.060(4) 0.056(4) 0.030(3) -0.006(3) 0.009(3) -0.005(3) 
C19 0.051(4) 0.052(4) 0.048(4) -0.008(3) 0.017(3) 0.004(3) 
C20 0.041(3) 0.045(3) 0.043(3) -0.004(3) 0.009(3) 0.007(3) 
C21 0.032(3) 0.032(3) 0.034(3) -0.001(2) 0.005(2) 0.000(2) 
C22 0.037(3) 0.043(3) 0.037(3) 0.001(3) 0.006(2) 0.003(2) 
C23 0.041(3) 0.059(4) 0.034(3) 0.001(3) 0.003(3) 0.003(3) 
C24 0.038(3) 0.063(4) 0.038(3) 0.001(3) 0.004(3) -0.003(3) 
C25 0.047(3) 0.048(4) 0.034(3) 0.000(3) 0.004(3) 0.003(3) 
C26 0.063(4) 0.055(4) 0.035(3) -0.004(3) 0.016(3) -0.002(3) 
C27 0.050(4) 0.056(4) 0.048(4) -0.014(3) 0.020(3) -0.002(3) 
C28 0.035(3) 0.050(4) 0.046(4) -0.007(3) 0.010(3) 0.003(3) 
C29 0.031(3) 0.040(3) 0.031(3) -0.001(2) 0.006(2) -0.002(2) 
C30 0.031(3) 0.049(3) 0.036(3) -0.001(3) 0.002(2) 0.003(2) 
C31 0.035(3) 0.078(5) 0.037(3) -0.004(3) 0.006(3) 0.006(3) 
C32 0.043(3) 0.057(4) 0.034(3) 0.003(3) 0.001(3) -0.001(3) 
C33 0.051(4) 0.051(4) 0.036(3) -0.002(3) -0.003(3) -0.005(3) 
C34 0.069(5) 0.063(4) 0.030(3) -0.011(3) 0.007(3) -0.008(4) 
C35 0.058(4) 0.061(4) 0.050(4) -0.018(3) 0.022(3) -0.011(3) 
C36 0.039(3) 0.050(4) 0.045(3) -0.008(3) 0.009(3) -0.003(3) 
C37 0.038(3) 0.033(3) 0.033(3) -0.003(2) 0.004(2) -0.005(2) 
C38 0.034(3) 0.045(3) 0.031(3) 0.006(2) 0.003(2) 0.002(2) 
C39 0.043(3) 0.065(4) 0.031(3) 0.001(3) 0.007(3) 0.004(3) 
C40 0.047(3) 0.047(3) 0.030(3) -0.001(3) 0.005(2) 0.001(3) 
C41 0.059(4) 0.072(5) 0.042(4) 0.008(3) 0.007(3) 0.010(4) 
C42 0.077(5) 0.073(5) 0.035(4) -0.001(3) 0.022(3) 0.010(4) 
C43 0.062(4) 0.065(5) 0.049(4) -0.003(3) 0.022(3) 0.011(4) 
C44 0.047(4) 0.061(4) 0.045(4) -0.003(3) 0.007(3) 0.014(3) 
C45 0.038(3) 0.044(3) 0.033(3) -0.005(2) 0.008(2) -0.003(3) 
C46 0.037(3) 0.056(4) 0.034(3) -0.002(3) 0.001(2) 0.004(3) 
C47 0.044(3) 0.076(5) 0.033(3) 0.002(3) 0.009(3) 0.008(3) 
C48 0.048(3) 0.066(4) 0.030(3) -0.002(3) 0.003(3) -0.004(3) 
Cl1 0.0831(14) 0.0714(13) 0.0643(12) -0.0003(10) 0.0276(10) 0.0052(11) 
O7 0.53(3) 0.36(2) 0.35(2) 0.243(18) 0.34(2) 0.36(2) 
O8 0.296(18) 0.193(12) 0.218(13) 0.021(10) -0.060(12) -0.163(13) 
O9 0.139(9) 0.67(4) 0.083(6) -0.060(12) 0.040(6) -0.107(15) 
O10 0.127(7) 0.107(6) 0.182(9) 0.034(6) 0.047(6) 0.018(5) 
Cl2 0.0591(10) 0.0767(13) 0.0516(10) 0.0012(9) 0.0144(8) -0.0002(9) 
O11 0.127(8) 0.50(3) 0.085(6) -0.056(10) -0.024(6) 0.045(12) 
O12 0.282(15) 0.091(6) 0.321(16) -0.036(8) 0.235(14) -0.037(8) 
O13 0.073(4) 0.194(9) 0.110(6) 0.005(6) 0.009(4) 0.030(5) 
O14 0.184(9) 0.072(5) 0.151(7) 0.007(5) 0.088(6) 0.005(5) 
Cl3 0.0793(14) 0.144(2) 0.0425(11) 0.0067(12) 0.0104(10) 0.0061(15) 
O15 0.26(2) 0.29(2) 0.49(3) -0.19(2) 0.10(2) 0.067(16) 
O16 0.226(17) 0.90(5) 0.132(11) 0.07(2) 0.100(11) 0.23(3) 
O17 0.46(3) 0.42(3) 0.266(18) -0.147(18) -0.238(19) 0.31(2) 
O18 0.36(3) 0.74(5) 0.162(13) 0.101(19) -0.086(14) -0.41(3) 
O19 0.047(3) 0.123(5) 0.093(4) -0.010(4) 0.024(3) -0.003(3) 
O20 0.049(3) 0.183(8) 0.093(5) 0.000(5) 0.031(3) 0.001(4) 
  
_geom_special_details 
; 
 All esds (except the esd in the dihedral angle between two l.s. planes) 
 are estimated using the full covariance matrix.  The cell esds are taken 
 into account individually in the estimation of esds in distances, angles 
 and torsion angles; correlations between esds in cell parameters are only 
 used when they are defined by crystal symmetry.  An approximate (isotropic) 
 treatment of cell esds is used for estimating esds involving l.s. planes. 
; 
  
loop_ 
 _geom_bond_atom_site_label_1 
 _geom_bond_atom_site_label_2 
 _geom_bond_distance 
 _geom_bond_site_symmetry_2 
 _geom_bond_publ_flag 
Ag1 N3 2.138(5) . ? 
Ag1 N1 2.149(5) . ? 
Ag2 N7 2.153(5) . ? 
Ag2 N5 2.160(5) . ? 
Ag3 N9 2.154(5) . ? 
Ag3 N11 2.177(5) . ? 
O1 C6 1.222(8) . ? 
O2 C14 1.215(8) . ? 
O3 C22 1.226(7) . ? 
O4 C30 1.213(7) . ? 
O5 C38 1.223(7) . ? 
O6 C46 1.217(7) . ? 
N1 C5 1.333(8) . ? 
N1 C1 1.362(8) . ? 
N2 C6 1.368(8) . ? 
N2 C5 1.397(8) . ? 
N3 C13 1.345(8) . ? 
N3 C9 1.365(8) . ? 
N4 C14 1.351(8) . ? 
N4 C13 1.395(8) . ? 
N5 C21 1.333(7) . ? 
N5 C17 1.357(7) . ? 
N6 C22 1.369(7) . ? 
N6 C21 1.400(7) . ? 
N7 C29 1.347(7) . ? 
N7 C25 1.356(7) . ? 
N8 C30 1.364(7) . ? 
N8 C29 1.393(7) . ? 
N9 C37 1.345(7) . ? 
N9 C33 1.354(7) . ? 
N10 C38 1.362(7) . ? 
N10 C37 1.401(7) . ? 
N11 C45 1.333(7) . ? 
N11 C41 1.352(8) . ? 
N12 C46 1.350(7) . ? 
N12 C45 1.405(7) . ? 
C1 C2 1.368(10) . ? 
C2 C3 1.366(11) . ? 
C3 C4 1.386(9) . ? 
C4 C5 1.395(9) . ? 
C6 C7 1.495(9) . ? 
C7 C8 1.488(9) . ? 
C8 C16 1.521(9) 4_676 ? 
C9 C10 1.360(11) . ? 
C10 C11 1.376(11) . ? 
C11 C12 1.386(10) . ? 
C12 C13 1.388(9) . ? 
C14 C15 1.496(9) . ? 
C15 C16 1.476(9) . ? 
C16 C8 1.521(9) 4_575 ? 
C17 C18 1.362(9) . ? 
C18 C19 1.398(9) . ? 
C19 C20 1.379(8) . ? 
C20 C21 1.385(8) . ? 
C22 C23 1.499(8) . ? 
C23 C24 1.507(8) . ? 
C24 C32 1.531(8) 4_565 ? 
C25 C26 1.355(9) . ? 
C26 C27 1.384(10) . ? 
C27 C28 1.377(9) . ? 
C28 C29 1.382(8) . ? 
C30 C31 1.519(8) . ? 
C31 C32 1.501(8) . ? 
C32 C24 1.531(8) 4_666 ? 
C33 C34 1.354(9) . ? 
C34 C35 1.370(10) . ? 
C35 C36 1.380(9) . ? 
C36 C37 1.382(8) . ? 
C38 C39 1.513(8) . ? 
C39 C40 1.516(8) . ? 
C40 C48 1.531(8) 4_666 ? 
C41 C42 1.346(10) . ? 
C42 C43 1.373(10) . ? 
C43 C44 1.372(9) . ? 
C44 C45 1.382(8) . ? 
C46 C47 1.519(8) . ? 
C47 C48 1.495(8) . ? 
C48 C40 1.531(8) 4_565 ? 
Cl1 O7 1.285(14) . ? 
Cl1 O9 1.299(11) . ? 
Cl1 O8 1.367(13) . ? 
Cl1 O10 1.465(9) . ? 
Cl2 O11 1.330(9) . ? 
Cl2 O12 1.355(10) . ? 
Cl2 O13 1.428(7) . ? 
Cl2 O14 1.429(8) . ? 
Cl3 O17 1.191(13) . ? 
Cl3 O16 1.202(13) . ? 
Cl3 O18 1.221(14) . ? 
Cl3 O15 1.301(15) . ? 
  
loop_ 
 _geom_angle_atom_site_label_1 
 _geom_angle_atom_site_label_2 
 _geom_angle_atom_site_label_3 
 _geom_angle 
 _geom_angle_site_symmetry_1 
 _geom_angle_site_symmetry_3 
 _geom_angle_publ_flag 
N3 Ag1 N1 169.01(19) . . ? 
N7 Ag2 N5 177.52(18) . . ? 
N9 Ag3 N11 169.86(18) . . ? 
C5 N1 C1 118.0(6) . . ? 
C5 N1 Ag1 127.7(4) . . ? 
C1 N1 Ag1 113.7(4) . . ? 
C6 N2 C5 128.1(5) . . ? 
C13 N3 C9 118.2(6) . . ? 
C13 N3 Ag1 124.4(4) . . ? 
C9 N3 Ag1 117.2(4) . . ? 
C14 N4 C13 126.0(5) . . ? 
C21 N5 C17 118.3(5) . . ? 
C21 N5 Ag2 123.6(4) . . ? 
C17 N5 Ag2 116.8(4) . . ? 
C22 N6 C21 128.1(5) . . ? 
C29 N7 C25 117.6(5) . . ? 
C29 N7 Ag2 123.3(4) . . ? 
C25 N7 Ag2 118.2(4) . . ? 
C30 N8 C29 126.5(5) . . ? 
C37 N9 C33 116.7(5) . . ? 
C37 N9 Ag3 126.1(4) . . ? 
C33 N9 Ag3 117.0(4) . . ? 
C38 N10 C37 127.1(5) . . ? 
C45 N11 C41 117.7(5) . . ? 
C45 N11 Ag3 125.9(4) . . ? 
C41 N11 Ag3 115.6(4) . . ? 
C46 N12 C45 128.0(5) . . ? 
N1 C1 C2 123.0(7) . . ? 
C3 C2 C1 118.4(7) . . ? 
C2 C3 C4 120.3(7) . . ? 
C3 C4 C5 118.1(6) . . ? 
N1 C5 C4 122.2(6) . . ? 
N1 C5 N2 115.7(5) . . ? 
C4 C5 N2 122.1(6) . . ? 
O1 C6 N2 122.6(6) . . ? 
O1 C6 C7 124.7(6) . . ? 
N2 C6 C7 112.7(5) . . ? 
C8 C7 C6 118.1(6) . . ? 
C7 C8 C16 108.9(6) . 4_676 ? 
C10 C9 N3 122.5(7) . . ? 
C9 C10 C11 119.0(7) . . ? 
C10 C11 C12 119.8(7) . . ? 
C11 C12 C13 118.4(7) . . ? 
N3 C13 C12 122.0(6) . . ? 
N3 C13 N4 115.6(5) . . ? 
C12 C13 N4 122.4(6) . . ? 
O2 C14 N4 121.5(6) . . ? 
O2 C14 C15 121.9(6) . . ? 
N4 C14 C15 116.6(6) . . ? 
C16 C15 C14 111.9(6) . . ? 
C15 C16 C8 116.5(6) . 4_575 ? 
N5 C17 C18 123.3(6) . . ? 
C17 C18 C19 117.7(6) . . ? 
C20 C19 C18 119.6(6) . . ? 
C19 C20 C21 118.9(6) . . ? 
N5 C21 C20 122.1(5) . . ? 
N5 C21 N6 114.4(5) . . ? 
C20 C21 N6 123.5(5) . . ? 
O3 C22 N6 122.0(5) . . ? 
O3 C22 C23 124.1(5) . . ? 
N6 C22 C23 113.9(5) . . ? 
C22 C23 C24 114.8(5) . . ? 
C23 C24 C32 112.2(5) . 4_565 ? 
C26 C25 N7 123.5(6) . . ? 
C25 C26 C27 118.3(6) . . ? 
C28 C27 C26 119.6(6) . . ? 
C27 C28 C29 118.9(6) . . ? 
N7 C29 C28 122.0(5) . . ? 
N7 C29 N8 114.5(5) . . ? 
C28 C29 N8 123.5(5) . . ? 
O4 C30 N8 122.9(5) . . ? 
O4 C30 C31 123.6(5) . . ? 
N8 C30 C31 113.5(5) . . ? 
C32 C31 C30 115.2(5) . . ? 
C31 C32 C24 112.7(5) . 4_666 ? 
C34 C33 N9 124.2(6) . . ? 
C33 C34 C35 118.2(6) . . ? 
C34 C35 C36 119.9(6) . . ? 
C35 C36 C37 118.5(6) . . ? 
N9 C37 C36 122.5(5) . . ? 
N9 C37 N10 114.1(5) . . ? 
C36 C37 N10 123.4(5) . . ? 
O5 C38 N10 123.9(5) . . ? 
O5 C38 C39 123.5(5) . . ? 
N10 C38 C39 112.6(5) . . ? 
C38 C39 C40 115.6(5) . . ? 
C39 C40 C48 107.7(5) . 4_666 ? 
C42 C41 N11 123.6(6) . . ? 
C41 C42 C43 118.3(6) . . ? 
C44 C43 C42 119.7(6) . . ? 
C43 C44 C45 118.8(6) . . ? 
N11 C45 C44 121.8(5) . . ? 
N11 C45 N12 114.3(5) . . ? 
C44 C45 N12 123.8(5) . . ? 
O6 C46 N12 122.4(6) . . ? 
O6 C46 C47 121.9(5) . . ? 
N12 C46 C47 115.7(5) . . ? 
C48 C47 C46 112.2(5) . . ? 
C47 C48 C40 114.1(5) . 4_565 ? 
O7 Cl1 O9 109.1(12) . . ? 
O7 Cl1 O8 128.6(14) . . ? 
O9 Cl1 O8 106.5(9) . . ? 
O7 Cl1 O10 101.9(7) . . ? 
O9 Cl1 O10 107.0(10) . . ? 
O8 Cl1 O10 101.7(7) . . ? 
O11 Cl2 O12 121.9(10) . . ? 
O11 Cl2 O13 104.8(6) . . ? 
O12 Cl2 O13 106.3(7) . . ? 
O11 Cl2 O14 109.7(9) . . ? 
O12 Cl2 O14 106.4(5) . . ? 
O13 Cl2 O14 106.8(6) . . ? 
O17 Cl3 O16 120.3(15) . . ? 
O17 Cl3 O18 115.2(19) . . ? 
O16 Cl3 O18 100.1(13) . . ? 
O17 Cl3 O15 103.1(14) . . ? 
O16 Cl3 O15 114.6(19) . . ? 
O18 Cl3 O15 102.7(17) . . ? 
  
_diffrn_measured_fraction_theta_max    0.987 
_diffrn_reflns_theta_full              25.06 
_diffrn_measured_fraction_theta_full   0.987 
_refine_diff_density_max    1.248 
_refine_diff_density_min   -0.804 
_refine_diff_density_rms    0.107 
  
#===END

data_8 
  
_audit_creation_method            SHELXL-97 
_chemical_name_systematic 
; 
 ? 
; 
_chemical_name_common             ? 
_chemical_melting_point           ? 
_chemical_formula_moiety          ? 
_chemical_formula_sum 
 'C40 H45 Ag2 N10 O9 S' 
_chemical_formula_weight          1057.66 
  
loop_ 
 _atom_type_symbol 
 _atom_type_description 
 _atom_type_scat_dispersion_real 
 _atom_type_scat_dispersion_imag 
 _atom_type_scat_source 
 'C'  'C'   0.0033   0.0016 
 'International Tables Vol C Tables 4.2.6.8 and 6.1.1.4' 
 'H'  'H'   0.0000   0.0000 
 'International Tables Vol C Tables 4.2.6.8 and 6.1.1.4' 
 'N'  'N'   0.0061   0.0033 
 'International Tables Vol C Tables 4.2.6.8 and 6.1.1.4' 
 'O'  'O'   0.0106   0.0060 
 'International Tables Vol C Tables 4.2.6.8 and 6.1.1.4' 
 'S'  'S'   0.1246   0.1234 
 'International Tables Vol C Tables 4.2.6.8 and 6.1.1.4' 
 'Ag'  'Ag'  -0.8971   1.1015 
 'International Tables Vol C Tables 4.2.6.8 and 6.1.1.4' 
  
_symmetry_cell_setting            Monoclinic 
_symmetry_space_group_name_H-M    C2/c 
  
loop_ 
 _symmetry_equiv_pos_as_xyz 
 'x, y, z' 
 '-x, y, -z+1/2' 
 'x+1/2, y+1/2, z' 
 '-x+1/2, y+1/2, -z+1/2' 
 '-x, -y, -z' 
 'x, -y, z-1/2' 
 '-x+1/2, -y+1/2, -z' 
 'x+1/2, -y+1/2, z-1/2' 
  
_cell_length_a                    31.390(5) 
_cell_length_b                    14.581(3) 
_cell_length_c                    22.107(5) 
_cell_angle_alpha                 90.00 
_cell_angle_beta                  119.167(13) 
_cell_angle_gamma                 90.00 
_cell_volume                      8836(3) 
_cell_formula_units_Z             8 
_cell_measurement_temperature     293(2) 
_cell_measurement_reflns_used     1007 
_cell_measurement_theta_min       3.12 
_cell_measurement_theta_max       24.91 
  
_exptl_crystal_description        plate 
_exptl_crystal_colour             colorless 
_exptl_crystal_size_max           0.8 
_exptl_crystal_size_mid           0.2 
_exptl_crystal_size_min           0.1 
_exptl_crystal_density_meas       0 
_exptl_crystal_density_diffrn     1.590 
_exptl_crystal_density_method     'not measured' 
_exptl_crystal_F_000              4296 
_exptl_absorpt_coefficient_mu     0.999 
_exptl_absorpt_correction_type    none 
_exptl_absorpt_correction_T_min   ? 
_exptl_absorpt_correction_T_max   ? 
_exptl_absorpt_process_details    ? 
  
_exptl_special_details 
; 
 ? 
; 
  
_diffrn_ambient_temperature       293(2) 
_diffrn_radiation_wavelength      0.71073 
_diffrn_radiation_type            MoK\a 
_diffrn_radiation_source          'fine-focus sealed tube' 
_diffrn_radiation_monochromator   graphite 
_diffrn_measurement_device_type   'CCD area detector' 
_diffrn_measurement_method        'phi and omega scans' 
_diffrn_detector_area_resol_mean  ? 
_diffrn_standards_number          ? 
_diffrn_standards_interval_count  ? 
_diffrn_standards_interval_time   ? 
_diffrn_standards_decay_%         ? 
_diffrn_reflns_number             20428 
_diffrn_reflns_av_R_equivalents   0.0369 
_diffrn_reflns_av_sigmaI/netI     0.0443 
_diffrn_reflns_limit_h_min        -36 
_diffrn_reflns_limit_h_max        37 
_diffrn_reflns_limit_k_min        -10 
_diffrn_reflns_limit_k_max        17 
_diffrn_reflns_limit_l_min        -26 
_diffrn_reflns_limit_l_max        26 
_diffrn_reflns_theta_min          2.09 
_diffrn_reflns_theta_max          25.13 
_reflns_number_total              7781 
_reflns_number_gt                 5462 
_reflns_threshold_expression      >2sigma(I) 
  
_computing_data_collection        'Bruker SMART' 
_computing_cell_refinement        'Bruker SMART' 
_computing_data_reduction         'Bruker SAINT' 
_computing_structure_solution     'SHELXS-97 (Sheldrick, 1990)' 
_computing_structure_refinement   'SHELXL-97 (Sheldrick, 1997)' 
_computing_molecular_graphics     'Bruker SHELXTL' 
_computing_publication_material   'Bruker SHELXTL' 
  
_refine_special_details 
; 
 Refinement of F^2^ against ALL reflections.  The weighted R-factor wR and 
 goodness of fit S are based on F^2^, conventional R-factors R are based 
 on F, with F set to zero for negative F^2^. The threshold expression of 
 F^2^ > 2sigma(F^2^) is used only for calculating R-factors(gt) etc. and is 
 not relevant to the choice of reflections for refinement.  R-factors based 
 on F^2^ are statistically about twice as large as those based on F, and R- 
 factors based on ALL data will be even larger. 
; 
  
_refine_ls_structure_factor_coef  Fsqd 
_refine_ls_matrix_type            full 
_refine_ls_weighting_scheme       calc 
_refine_ls_weighting_details 
 'calc w=1/[\s^2^(Fo^2^)+(0.0352P)^2^+11.6192P] where P=(Fo^2^+2Fc^2^)/3' 
_atom_sites_solution_primary      direct 
_atom_sites_solution_secondary    difmap 
_atom_sites_solution_hydrogens    geom 
_refine_ls_hydrogen_treatment     constr 
_refine_ls_extinction_method      none 
_refine_ls_extinction_coef        ? 
_refine_ls_number_reflns          7781 
_refine_ls_number_parameters      559 
_refine_ls_number_restraints      0 
_refine_ls_R_factor_all           0.0640 
_refine_ls_R_factor_gt            0.0361 
_refine_ls_wR_factor_ref          0.0906 
_refine_ls_wR_factor_gt           0.0796 
_refine_ls_goodness_of_fit_ref    1.006 
_refine_ls_restrained_S_all       1.006 
_refine_ls_shift/su_max           0.000 
_refine_ls_shift/su_mean          0.000 
  
loop_ 
 _atom_site_label 
 _atom_site_type_symbol 
 _atom_site_fract_x 
 _atom_site_fract_y 
 _atom_site_fract_z 
 _atom_site_U_iso_or_equiv 
 _atom_site_adp_type 
 _atom_site_occupancy 
 _atom_site_symmetry_multiplicity 
 _atom_site_calc_flag 
 _atom_site_refinement_flags 
 _atom_site_disorder_assembly 
 _atom_site_disorder_group 
Ag1 Ag 0.011829(11) 0.01282(2) 0.335515(19) 0.06429(12) Uani 1 1 d . . . 
Ag2 Ag 0.192402(11) 0.21252(2) 0.292144(19) 0.06358(12) Uani 1 1 d . . . 
S S 0.10456(3) 0.07528(6) 0.28520(5) 0.0453(2) Uani 1 1 d . . . 
O1 O 0.13982(12) -0.2859(2) 0.41498(18) 0.0821(9) Uani 1 1 d . . . 
O2 O 0.25016(11) -0.1328(2) 0.26081(19) 0.0844(10) Uani 1 1 d . . . 
O3 O 0.05589(14) 0.4571(2) 0.1621(3) 0.1267(17) Uani 1 1 d . . . 
O4 O 0.19720(17) 0.2516(3) 0.54171(19) 0.1195(14) Uani 1 1 d . . . 
O5 O 0.03927(16) -0.1008(3) 0.48118(19) 0.1210(15) Uani 1 1 d . . . 
O6 O 0.08521(10) 0.02222(18) 0.32252(17) 0.0720(8) Uani 1 1 d . . . 
O7 O 0.15838(8) 0.07876(16) 0.32861(13) 0.0520(6) Uani 1 1 d . . . 
O8 O 0.09220(11) 0.0296(2) 0.22026(15) 0.0755(9) Uani 1 1 d . . . 
O9 O 0.08494(10) 0.16824(16) 0.27387(15) 0.0635(7) Uani 1 1 d . . . 
N1 N 0.00724(11) -0.1407(2) 0.32960(15) 0.0498(7) Uani 1 1 d . . . 
N2 N 0.08905(11) -0.1634(2) 0.36690(16) 0.0526(8) Uani 1 1 d . . . 
H2A H 0.0887 -0.1068 0.3557 0.063 Uiso 1 1 calc R . . 
N3 N 0.22943(11) -0.00574(19) 0.29961(17) 0.0553(8) Uani 1 1 d . . . 
H3A H 0.2068 0.0184 0.3056 0.066 Uiso 1 1 calc R . . 
N4 N 0.26301(10) 0.13819(19) 0.31649(15) 0.0463(7) Uani 1 1 d . . . 
N5 N 0.14569(13) 0.2445(3) 0.17441(19) 0.0663(9) Uani 1 1 d . . . 
N6 N 0.08653(12) 0.3133(2) 0.19092(19) 0.0670(10) Uani 1 1 d . . . 
H6A H 0.0879 0.2667 0.2156 0.080 Uiso 1 1 calc R . . 
N7 N 0.18821(12) 0.3313(2) 0.35682(18) 0.0601(8) Uani 1 1 d . . . 
N8 N 0.18126(12) 0.2324(2) 0.43208(18) 0.0622(9) Uani 1 1 d . . . 
H8B H 0.1756 0.1915 0.4010 0.075 Uiso 1 1 calc R . . 
N9 N 0.04004(11) -0.0960(2) 0.58324(17) 0.0587(8) Uani 1 1 d . . . 
H9B H 0.0540 -0.0702 0.6233 0.070 Uiso 1 1 calc R . . 
N10 N -0.01680(11) -0.1469(2) 0.61220(17) 0.0552(8) Uani 1 1 d . . . 
C1 C -0.03718(15) -0.1722(3) 0.3131(2) 0.0628(11) Uani 1 1 d . . . 
H1A H -0.0628 -0.1304 0.2978 0.075 Uiso 1 1 calc R . . 
C2 C -0.04688(18) -0.2626(3) 0.3178(3) 0.0746(13) Uani 1 1 d . . . 
H2B H -0.0782 -0.2818 0.3061 0.090 Uiso 1 1 calc R . . 
C3 C -0.00887(19) -0.3244(3) 0.3402(3) 0.0800(14) Uani 1 1 d . . . 
H3B H -0.0143 -0.3863 0.3441 0.096 Uiso 1 1 calc R . . 
C4 C 0.03685(17) -0.2942(3) 0.3567(2) 0.0660(11) Uani 1 1 d . . . 
H4A H 0.0627 -0.3352 0.3712 0.079 Uiso 1 1 calc R . . 
C5 C 0.04392(14) -0.2014(2) 0.35139(19) 0.0486(9) Uani 1 1 d . . . 
C6 C 0.13376(15) -0.2054(3) 0.3977(2) 0.0585(10) Uani 1 1 d . . . 
C7 C 0.17628(15) -0.1443(3) 0.4112(2) 0.0627(11) Uani 1 1 d . . . 
H7A H 0.1931 -0.1261 0.4595 0.075 Uiso 1 1 calc R . . 
H7B H 0.1643 -0.0892 0.3833 0.075 Uiso 1 1 calc R . . 
C8 C 0.21223(15) -0.1932(3) 0.3938(2) 0.0701(12) Uani 1 1 d . . . 
H8C H 0.2400 -0.1533 0.4060 0.084 Uiso 1 1 calc R . . 
H8D H 0.2241 -0.2481 0.4220 0.084 Uiso 1 1 calc R . . 
C9 C 0.19036(15) -0.2199(3) 0.3183(2) 0.0663(11) Uani 1 1 d . . . 
H9C H 0.1612 -0.2559 0.3054 0.080 Uiso 1 1 calc R . . 
H9D H 0.2134 -0.2587 0.3130 0.080 Uiso 1 1 calc R . . 
C10 C 0.17705(14) -0.1392(3) 0.2683(2) 0.0585(10) Uani 1 1 d . . . 
H10A H 0.1573 -0.1609 0.2212 0.070 Uiso 1 1 calc R . . 
H10B H 0.1579 -0.0952 0.2778 0.070 Uiso 1 1 calc R . . 
C11 C 0.22205(14) -0.0929(3) 0.2752(2) 0.0560(10) Uani 1 1 d . . . 
C12 C 0.27022(13) 0.0485(2) 0.31593(19) 0.0483(9) Uani 1 1 d . . . 
C13 C 0.31554(14) 0.0121(3) 0.3320(2) 0.0683(12) Uani 1 1 d . . . 
H13A H 0.3197 -0.0509 0.3309 0.082 Uiso 1 1 calc R . . 
C14 C 0.35370(15) 0.0707(3) 0.3493(3) 0.0738(13) Uani 1 1 d . . . 
H14A H 0.3841 0.0478 0.3594 0.089 Uiso 1 1 calc R . . 
C15 C 0.34707(15) 0.1632(3) 0.3517(2) 0.0652(11) Uani 1 1 d . . . 
H15A H 0.3729 0.2039 0.3644 0.078 Uiso 1 1 calc R . . 
C16 C 0.30155(14) 0.1941(3) 0.3351(2) 0.0569(10) Uani 1 1 d . . . 
H16A H 0.2970 0.2569 0.3366 0.068 Uiso 1 1 calc R . . 
C17 C 0.1674(2) 0.2273(4) 0.1357(3) 0.0903(16) Uani 1 1 d . . . 
H17A H 0.1935 0.1865 0.1527 0.108 Uiso 1 1 calc R . . 
C18 C 0.1528(3) 0.2664(6) 0.0740(4) 0.123(3) Uani 1 1 d . . . 
H18A H 0.1686 0.2526 0.0487 0.148 Uiso 1 1 calc R . . 
C19 C 0.1145(3) 0.3273(6) 0.0481(3) 0.129(3) Uani 1 1 d . . . 
H19A H 0.1043 0.3552 0.0054 0.155 Uiso 1 1 calc R . . 
C20 C 0.0914(2) 0.3464(4) 0.0859(3) 0.0996(19) Uani 1 1 d . . . 
H20A H 0.0655 0.3874 0.0695 0.119 Uiso 1 1 calc R . . 
C21 C 0.10813(16) 0.3024(3) 0.1495(2) 0.0681(12) Uani 1 1 d . . . 
C22 C 0.06335(15) 0.3891(3) 0.1973(3) 0.0882(17) Uani 1 1 d . . . 
C23 C 0.0510(2) 0.3794(3) 0.2549(4) 0.109(2) Uani 1 1 d . . . 
H23A H 0.0813 0.3710 0.2979 0.130 Uiso 1 1 calc R . . 
H23B H 0.0320 0.3239 0.2467 0.130 Uiso 1 1 calc R . . 
C24 C 0.0230(2) 0.4583(3) 0.2648(5) 0.166(4) Uani 1 1 d . . . 
H24A H 0.0347 0.4635 0.3142 0.200 Uiso 1 1 calc R . . 
H24B H 0.0328 0.5141 0.2508 0.200 Uiso 1 1 calc R . . 
C25 C 0.18979(18) 0.4166(3) 0.3344(3) 0.0818(14) Uani 1 1 d . . . 
H25A H 0.1922 0.4230 0.2943 0.098 Uiso 1 1 calc R . . 
C26 C 0.1880(2) 0.4939(4) 0.3678(4) 0.1078(19) Uani 1 1 d . . . 
H26A H 0.1888 0.5517 0.3506 0.129 Uiso 1 1 calc R . . 
C27 C 0.1850(2) 0.4846(4) 0.4268(4) 0.112(2) Uani 1 1 d . . . 
H27A H 0.1837 0.5364 0.4503 0.134 Uiso 1 1 calc R . . 
C28 C 0.18400(19) 0.3991(4) 0.4518(3) 0.0880(15) Uani 1 1 d . . . 
H28A H 0.1828 0.3919 0.4927 0.106 Uiso 1 1 calc R . . 
C29 C 0.18484(15) 0.3226(3) 0.4139(2) 0.0644(11) Uani 1 1 d . . . 
C30 C 0.18567(16) 0.2013(4) 0.4928(2) 0.0724(12) Uani 1 1 d . . . 
C31 C 0.17534(19) 0.1017(4) 0.4938(3) 0.0842(15) Uani 1 1 d . . . 
H31A H 0.2051 0.0668 0.5088 0.101 Uiso 1 1 calc R . . 
H31B H 0.1519 0.0816 0.4475 0.101 Uiso 1 1 calc R . . 
C32 C 0.1548(2) 0.0835(4) 0.5433(3) 0.110(2) Uani 1 1 d . . . 
H32A H 0.1819 0.0723 0.5893 0.132 Uiso 1 1 calc R . . 
H32B H 0.1382 0.1383 0.5457 0.132 Uiso 1 1 calc R . . 
C33 C 0.12190(19) 0.0085(4) 0.5246(3) 0.0888(16) Uani 1 1 d . . . 
H33A H 0.1395 -0.0473 0.5269 0.107 Uiso 1 1 calc R . . 
H33B H 0.0966 0.0165 0.4769 0.107 Uiso 1 1 calc R . . 
C34 C 0.09763(18) -0.0041(3) 0.5690(2) 0.0757(13) Uani 1 1 d . . . 
H34A H 0.1219 -0.0245 0.6148 0.091 Uiso 1 1 calc R . . 
H34B H 0.0852 0.0546 0.5741 0.091 Uiso 1 1 calc R . . 
C35 C 0.05671(17) -0.0718(3) 0.5393(3) 0.0711(12) Uani 1 1 d . . . 
C36 C 0.00277(13) -0.1578(3) 0.5709(2) 0.0561(10) Uani 1 1 d . . . 
C37 C -0.01163(16) -0.2293(3) 0.5228(2) 0.0708(12) Uani 1 1 d . . . 
H37A H 0.0009 -0.2344 0.4925 0.085 Uiso 1 1 calc R . . 
C38 C -0.04486(17) -0.2917(3) 0.5215(3) 0.0839(15) Uani 1 1 d . . . 
H38A H -0.0549 -0.3403 0.4903 0.101 Uiso 1 1 calc R . . 
C39 C -0.06323(17) -0.2830(3) 0.5657(3) 0.0814(14) Uani 1 1 d . . . 
H39A H -0.0849 -0.3261 0.5661 0.098 Uiso 1 1 calc R . . 
C40 C -0.04922(15) -0.2097(3) 0.6094(2) 0.0668(11) Uani 1 1 d . . . 
H40A H -0.0626 -0.2027 0.6386 0.080 Uiso 1 1 calc R . . 
  
loop_ 
 _atom_site_aniso_label 
 _atom_site_aniso_U_11 
 _atom_site_aniso_U_22 
 _atom_site_aniso_U_33 
 _atom_site_aniso_U_23 
 _atom_site_aniso_U_13 
 _atom_site_aniso_U_12 
Ag1 0.0598(2) 0.04924(18) 0.0982(3) -0.00866(17) 0.04975(19) -0.00230(14) 
Ag2 0.0644(2) 0.05112(18) 0.0955(3) 0.00845(17) 0.0548(2) 0.00930(15) 
S 0.0451(5) 0.0364(4) 0.0618(6) 0.0041(4) 0.0318(5) 0.0015(4) 
O1 0.087(2) 0.0594(19) 0.118(3) 0.0287(18) 0.064(2) 0.0225(16) 
O2 0.082(2) 0.0667(18) 0.136(3) -0.0356(19) 0.078(2) -0.0118(16) 
O3 0.097(3) 0.071(2) 0.228(5) 0.075(3) 0.091(3) 0.025(2) 
O4 0.169(4) 0.128(3) 0.072(2) -0.028(2) 0.067(3) -0.042(3) 
O5 0.136(3) 0.176(4) 0.070(2) -0.024(3) 0.064(2) -0.045(3) 
O6 0.0610(17) 0.0570(16) 0.119(2) 0.0301(17) 0.0603(18) 0.0077(13) 
O7 0.0445(14) 0.0541(15) 0.0641(16) -0.0053(13) 0.0316(13) -0.0036(11) 
O8 0.081(2) 0.0648(18) 0.0613(18) -0.0095(15) 0.0193(16) 0.0141(16) 
O9 0.0730(18) 0.0405(14) 0.096(2) 0.0119(14) 0.0558(17) 0.0101(13) 
N1 0.0543(19) 0.0463(17) 0.0560(19) -0.0013(15) 0.0327(16) -0.0055(15) 
N2 0.059(2) 0.0412(16) 0.066(2) 0.0045(15) 0.0368(17) 0.0040(15) 
N3 0.0510(18) 0.0451(18) 0.081(2) -0.0084(16) 0.0411(18) 0.0015(14) 
N4 0.0477(17) 0.0430(17) 0.0565(19) 0.0030(14) 0.0318(16) 0.0030(14) 
N5 0.065(2) 0.072(2) 0.071(2) -0.007(2) 0.040(2) -0.0145(19) 
N6 0.056(2) 0.054(2) 0.094(3) 0.0216(19) 0.039(2) -0.0015(16) 
N7 0.065(2) 0.0512(19) 0.076(2) -0.0019(18) 0.044(2) -0.0007(16) 
N8 0.069(2) 0.069(2) 0.062(2) -0.0122(18) 0.0429(19) -0.0139(18) 
N9 0.057(2) 0.071(2) 0.056(2) -0.0057(17) 0.0337(18) -0.0043(17) 
N10 0.0478(18) 0.0528(18) 0.069(2) -0.0036(17) 0.0321(17) 0.0016(15) 
C1 0.062(3) 0.061(3) 0.072(3) -0.002(2) 0.037(2) -0.006(2) 
C2 0.074(3) 0.066(3) 0.094(4) -0.009(3) 0.049(3) -0.023(2) 
C3 0.099(4) 0.049(2) 0.102(4) -0.005(3) 0.057(3) -0.019(3) 
C4 0.079(3) 0.044(2) 0.082(3) 0.000(2) 0.046(3) -0.002(2) 
C5 0.062(2) 0.042(2) 0.051(2) -0.0025(18) 0.035(2) -0.0020(18) 
C6 0.067(3) 0.055(2) 0.068(3) 0.006(2) 0.045(2) 0.009(2) 
C7 0.062(3) 0.061(2) 0.068(3) 0.002(2) 0.034(2) 0.006(2) 
C8 0.054(2) 0.071(3) 0.092(3) 0.011(3) 0.041(3) 0.010(2) 
C9 0.064(3) 0.053(2) 0.096(3) -0.006(2) 0.051(3) 0.004(2) 
C10 0.055(2) 0.050(2) 0.077(3) -0.010(2) 0.037(2) -0.0023(18) 
C11 0.054(2) 0.051(2) 0.070(3) -0.007(2) 0.036(2) 0.0028(18) 
C12 0.046(2) 0.049(2) 0.055(2) -0.0042(18) 0.0287(19) 0.0036(17) 
C13 0.050(2) 0.054(2) 0.101(3) -0.005(2) 0.037(2) 0.010(2) 
C14 0.047(2) 0.075(3) 0.099(4) -0.004(3) 0.035(3) 0.009(2) 
C15 0.049(2) 0.068(3) 0.082(3) 0.000(2) 0.035(2) -0.006(2) 
C16 0.062(3) 0.051(2) 0.065(3) 0.004(2) 0.037(2) -0.0003(19) 
C17 0.090(4) 0.106(4) 0.092(4) -0.033(3) 0.058(3) -0.037(3) 
C18 0.136(6) 0.177(8) 0.077(5) -0.039(5) 0.069(5) -0.083(6) 
C19 0.137(6) 0.167(7) 0.063(4) 0.001(4) 0.034(5) -0.085(6) 
C20 0.092(4) 0.107(4) 0.073(4) 0.018(3) 0.020(3) -0.046(3) 
C21 0.057(3) 0.067(3) 0.072(3) 0.004(2) 0.026(2) -0.027(2) 
C22 0.046(2) 0.057(3) 0.164(5) 0.033(3) 0.054(3) 0.006(2) 
C23 0.097(4) 0.063(3) 0.218(7) 0.033(4) 0.118(5) 0.021(3) 
C24 0.120(5) 0.043(3) 0.400(13) 0.027(5) 0.177(8) 0.012(3) 
C25 0.096(4) 0.054(3) 0.106(4) 0.004(3) 0.058(3) -0.004(2) 
C26 0.132(5) 0.054(3) 0.148(6) -0.009(3) 0.077(5) -0.003(3) 
C27 0.128(5) 0.070(4) 0.153(6) -0.039(4) 0.081(5) -0.011(3) 
C28 0.103(4) 0.078(4) 0.102(4) -0.029(3) 0.066(3) -0.016(3) 
C29 0.057(2) 0.058(3) 0.086(3) -0.013(2) 0.040(2) -0.008(2) 
C30 0.066(3) 0.096(4) 0.064(3) -0.008(3) 0.039(2) -0.018(3) 
C31 0.090(3) 0.102(4) 0.073(3) 0.003(3) 0.049(3) -0.024(3) 
C32 0.133(5) 0.142(5) 0.075(3) -0.015(3) 0.067(4) -0.064(4) 
C33 0.088(4) 0.117(4) 0.085(4) 0.008(3) 0.061(3) -0.011(3) 
C34 0.081(3) 0.088(3) 0.077(3) 0.008(3) 0.053(3) -0.004(3) 
C35 0.070(3) 0.089(3) 0.063(3) 0.000(3) 0.039(3) 0.004(3) 
C36 0.045(2) 0.060(2) 0.059(3) -0.001(2) 0.022(2) 0.0066(19) 
C37 0.066(3) 0.072(3) 0.069(3) -0.017(2) 0.028(2) 0.010(2) 
C38 0.062(3) 0.068(3) 0.096(4) -0.028(3) 0.019(3) -0.006(2) 
C39 0.060(3) 0.061(3) 0.117(4) -0.010(3) 0.038(3) -0.005(2) 
C40 0.054(2) 0.059(3) 0.090(3) -0.001(2) 0.038(2) 0.000(2) 
  
_geom_special_details 
; 
 All esds (except the esd in the dihedral angle between two l.s. planes) 
 are estimated using the full covariance matrix.  The cell esds are taken 
 into account individually in the estimation of esds in distances, angles 
 and torsion angles; correlations between esds in cell parameters are only 
 used when they are defined by crystal symmetry.  An approximate (isotropic) 
 treatment of cell esds is used for estimating esds involving l.s. planes. 
; 
  
loop_ 
 _geom_bond_atom_site_label_1 
 _geom_bond_atom_site_label_2 
 _geom_bond_distance 
 _geom_bond_site_symmetry_2 
 _geom_bond_publ_flag 
Ag1 N10 2.238(3) 5_556 ? 
Ag1 N1 2.243(3) . ? 
Ag1 O6 2.460(2) . ? 
Ag2 N4 2.283(3) . ? 
Ag2 N7 2.291(3) . ? 
Ag2 N5 2.328(4) . ? 
Ag2 O7 2.536(2) . ? 
S O8 1.453(3) . ? 
S O9 1.459(2) . ? 
S O6 1.462(3) . ? 
S O7 1.482(3) . ? 
O1 C6 1.219(4) . ? 
O2 C11 1.221(4) . ? 
O3 C22 1.210(5) . ? 
O4 C30 1.208(5) . ? 
O5 C35 1.202(5) . ? 
N1 C1 1.339(5) . ? 
N1 C5 1.342(5) . ? 
N2 C6 1.370(5) . ? 
N2 C5 1.399(5) . ? 
N3 C11 1.356(4) . ? 
N3 C12 1.395(5) . ? 
N4 C12 1.328(4) . ? 
N4 C16 1.346(5) . ? 
N5 C21 1.331(6) . ? 
N5 C17 1.352(6) . ? 
N6 C22 1.368(6) . ? 
N6 C21 1.389(6) . ? 
N7 C29 1.322(5) . ? 
N7 C25 1.349(5) . ? 
N8 C30 1.358(5) . ? 
N8 C29 1.397(5) . ? 
N9 C35 1.355(5) . ? 
N9 C36 1.395(5) . ? 
N10 C36 1.335(5) . ? 
N10 C40 1.348(5) . ? 
N10 Ag1 2.238(3) 5_556 ? 
C1 C2 1.367(6) . ? 
C2 C3 1.380(6) . ? 
C3 C4 1.370(6) . ? 
C4 C5 1.385(5) . ? 
C6 C7 1.509(6) . ? 
C7 C8 1.533(5) . ? 
C8 C9 1.514(6) . ? 
C9 C10 1.526(6) . ? 
C10 C11 1.505(5) . ? 
C12 C13 1.393(5) . ? 
C13 C14 1.365(6) . ? 
C14 C15 1.370(6) . ? 
C15 C16 1.366(5) . ? 
C17 C18 1.338(9) . ? 
C18 C19 1.375(10) . ? 
C19 C20 1.376(10) . ? 
C20 C21 1.395(7) . ? 
C22 C23 1.506(8) . ? 
C23 C24 1.527(7) . ? 
C24 C24 1.264(12) 2 ? 
C25 C26 1.364(7) . ? 
C26 C27 1.359(9) . ? 
C27 C28 1.370(8) . ? 
C28 C29 1.403(6) . ? 
C30 C31 1.491(7) . ? 
C31 C32 1.539(6) . ? 
C32 C33 1.420(7) . ? 
C33 C34 1.520(6) . ? 
C34 C35 1.495(6) . ? 
C36 C37 1.398(6) . ? 
C37 C38 1.375(7) . ? 
C38 C39 1.362(7) . ? 
C39 C40 1.361(6) . ? 
  
loop_ 
 _geom_angle_atom_site_label_1 
 _geom_angle_atom_site_label_2 
 _geom_angle_atom_site_label_3 
 _geom_angle 
 _geom_angle_site_symmetry_1 
 _geom_angle_site_symmetry_3 
 _geom_angle_publ_flag 
N10 Ag1 N1 152.69(11) 5_556 . ? 
N10 Ag1 O6 100.26(10) 5_556 . ? 
N1 Ag1 O6 94.93(10) . . ? 
N4 Ag2 N7 123.80(11) . . ? 
N4 Ag2 N5 111.63(12) . . ? 
N7 Ag2 N5 110.47(13) . . ? 
N4 Ag2 O7 94.05(9) . . ? 
N7 Ag2 O7 102.83(10) . . ? 
N5 Ag2 O7 112.09(10) . . ? 
O8 S O9 111.63(17) . . ? 
O8 S O6 109.32(19) . . ? 
O9 S O6 109.38(15) . . ? 
O8 S O7 109.06(17) . . ? 
O9 S O7 109.39(15) . . ? 
O6 S O7 107.98(16) . . ? 
S O6 Ag1 139.96(16) . . ? 
S O7 Ag2 110.13(13) . . ? 
C1 N1 C5 118.0(3) . . ? 
C1 N1 Ag1 112.8(3) . . ? 
C5 N1 Ag1 128.1(2) . . ? 
C6 N2 C5 127.9(3) . . ? 
C11 N3 C12 126.3(3) . . ? 
C12 N4 C16 117.8(3) . . ? 
C12 N4 Ag2 128.0(2) . . ? 
C16 N4 Ag2 114.2(2) . . ? 
C21 N5 C17 118.3(4) . . ? 
C21 N5 Ag2 122.5(3) . . ? 
C17 N5 Ag2 115.7(3) . . ? 
C22 N6 C21 128.0(4) . . ? 
C29 N7 C25 118.3(4) . . ? 
C29 N7 Ag2 125.3(3) . . ? 
C25 N7 Ag2 116.4(3) . . ? 
C30 N8 C29 128.0(4) . . ? 
C35 N9 C36 127.4(4) . . ? 
C36 N10 C40 118.5(4) . . ? 
C36 N10 Ag1 121.2(3) . 5_556 ? 
C40 N10 Ag1 118.6(3) . 5_556 ? 
N1 C1 C2 123.4(4) . . ? 
C1 C2 C3 118.1(4) . . ? 
C4 C3 C2 119.7(4) . . ? 
C3 C4 C5 118.8(4) . . ? 
N1 C5 C4 122.0(4) . . ? 
N1 C5 N2 114.6(3) . . ? 
C4 C5 N2 123.4(4) . . ? 
O1 C6 N2 123.5(4) . . ? 
O1 C6 C7 121.2(4) . . ? 
N2 C6 C7 115.3(3) . . ? 
C6 C7 C8 111.3(3) . . ? 
C9 C8 C7 113.7(3) . . ? 
C8 C9 C10 114.7(3) . . ? 
C11 C10 C9 111.1(3) . . ? 
O2 C11 N3 123.0(4) . . ? 
O2 C11 C10 121.5(4) . . ? 
N3 C11 C10 115.5(3) . . ? 
N4 C12 C13 122.1(3) . . ? 
N4 C12 N3 114.9(3) . . ? 
C13 C12 N3 123.0(3) . . ? 
C14 C13 C12 118.7(4) . . ? 
C13 C14 C15 119.8(4) . . ? 
C16 C15 C14 118.2(4) . . ? 
N4 C16 C15 123.3(4) . . ? 
C18 C17 N5 122.6(6) . . ? 
C17 C18 C19 119.6(7) . . ? 
C18 C19 C20 119.4(6) . . ? 
C19 C20 C21 118.0(7) . . ? 
N5 C21 N6 114.7(4) . . ? 
N5 C21 C20 122.0(5) . . ? 
N6 C21 C20 123.2(5) . . ? 
O3 C22 N6 122.8(5) . . ? 
O3 C22 C23 124.8(5) . . ? 
N6 C22 C23 112.3(4) . . ? 
C22 C23 C24 117.0(5) . . ? 
C24 C24 C23 121.2(7) 2 . ? 
N7 C25 C26 122.9(5) . . ? 
C27 C26 C25 118.6(5) . . ? 
C26 C27 C28 120.2(5) . . ? 
C27 C28 C29 118.1(5) . . ? 
N7 C29 N8 114.9(4) . . ? 
N7 C29 C28 121.8(4) . . ? 
N8 C29 C28 123.3(4) . . ? 
O4 C30 N8 121.6(5) . . ? 
O4 C30 C31 123.4(4) . . ? 
N8 C30 C31 115.0(4) . . ? 
C30 C31 C32 110.4(4) . . ? 
C33 C32 C31 115.0(4) . . ? 
C32 C33 C34 115.3(5) . . ? 
C35 C34 C33 113.0(4) . . ? 
O5 C35 N9 122.8(5) . . ? 
O5 C35 C34 123.2(4) . . ? 
N9 C35 C34 114.0(4) . . ? 
N10 C36 N9 114.2(3) . . ? 
N10 C36 C37 121.6(4) . . ? 
N9 C36 C37 124.1(4) . . ? 
C38 C37 C36 118.0(4) . . ? 
C39 C38 C37 120.4(4) . . ? 
C40 C39 C38 118.7(5) . . ? 
N10 C40 C39 122.8(4) . . ? 
  
_diffrn_measured_fraction_theta_max    0.983 
_diffrn_reflns_theta_full              25.13 
_diffrn_measured_fraction_theta_full   0.983 
_refine_diff_density_max    0.533 
_refine_diff_density_min   -0.452 
_refine_diff_density_rms    0.057 
  
#===END
